# Supplementary material
Source: PubMed Central journal article supplement (PMC2919626)
Supplement: NIHMS214961-supplement-1.pdf [file NIHMS214961-supplement-1.pdf]

## Supplementary Materials for:

# Discovery and characterization of chromatin states for systematic annotation of the human genome.

Jason Ernst<sup>1,2</sup>, Manolis Kellis<sup>1,2</sup>

<sup>1</sup>MIT Computer Science and Artificial Intelligence Laboratory, 32 Vassar Street, Cambridge, Massachusetts 02139, USA

<sup>2</sup>Broad Institute of MIT and Harvard, 7 Cambridge Center, Cambridge, Massachusetts 02142, USA

## Overview of Supplementary Materials:

### Supplementary Notes

1. Capturing genomic spatial context information.
2. Establishing the number of biologically-relevant chromatin states.
3. General validation of modeling approach.
4. Transcription associated states.
5. Active intergenic associated states.
6. Predictive power comparison with individual mark intensities and alternate methods.
7. Additive and combinatorial relationships of marks.
8. Chromatin state recovery using subsets of marks.

### Supplementary Tables

1. Chromatin state characterization.
2. Sequence tag thresholds for binarization of each chromatin mark input signal.

### Supplementary Figures

#### A. Chromatin state definition and components of the model

1. Example of posterior probability distributions for all 51 chromatin states.
2. Individual mark frequencies for each chromatin state (Emission Probability Matrix).
3. Top five most-frequently-detected chromatin marks for each state.
4. State-to-State transition probabilities (Transition Matrix).
5. High-probability transitions for each state.
6. Chromatin state co-occurrence enrichments at distances of 0kb, 2kb, 10kb, and 20kb.
7. Comparison with published ChromaSig clusters illustrates increased coverage.

#### B. Model training, selection, and robustness

8. Bayesian Information Criterion (BIC) score with increasing numbers of states and convergence of model training.
9. State discrimination with all 41 marks: overlap in posterior probabilities in genome-wide probabilistic assignments.
10. Pairwise expected vs. observed mark co-occurrence.

11. Chromatin marks become conditionally independent with increasing numbers of states.
12. Emission probabilities of 79-state model used for nested initialization.
13. Advantage of nested-initialization strategy for consistent state recovery using a small number of states.
14. Maximal state enrichments for three different types of genomic elements by models of increasing numbers of states.
15. Recovery of states from 10 random random-initialization 51-state models using the nested-initialization 51-state model.
16. Percent genome coverage.
17. Chromatin state emission vector distances visualized using Multi-Dimensional Scaling
18. Robustness of chromatin states to mark detection thresholds.
19. Correlation of mark presence calls with background model based on nucleosome density.
20. Sequence tag enrichments relative to genome average, and relative to input control.
21. Chromatin states capture tag intensities outside binary cutoffs.

### **C. Properties of chromatin states**

22. Chromatin state association with expression level of downstream genes.
23. Transcription factor binding and motif enrichments.
24. Spliced exon enrichments.
25. Elongating vs. resting Pol2 enrichments relative to an IgG control.
26. Di-nucleotide percentages.
27. Chromatin state enrichments for each chromosomal staining band for all human chromosomes.
28. Staining band genome-wide enrichments for each state.
29. Gene Ontology (GO) enrichments for states with the most transcription start sites
30. Histone Deacetylase (HDAC) inhibition response enrichments.
31. RepeatMasker class and family enrichments.

### **D. Predictive power for gene annotation**

32. Comparison of TSS Recovery with Individual Marks at varying intensity thresholds, K-means, and Logistic Regression.
33. Overlap with Expressed Sequence Tags (ESTs).
34. Expression enrichments for numerous cell types.
35. State enrichments for most expressed and most repressed genes.
36. Transcription Start Site and Transcribed Region Recovery in additional Cell Types.
37. State overlap of varying distances from TSS and genes, and detection of Pol2 away from genes.

### **E. Recovery of chromatin states using different combinations of marks and in additional cell types**

38. Example of combinatorial mark relationships.
39. Chromatin State Recovery with Subset of 10 Chromatin Marks.
40. Chromatin State Recovery with all marks except CTCF and Pol2.
41. Enrichment of State 27 Relative to the Transcription End Sites across Cell Types.

# Supplementary Notes

## 1. Capturing Genomic Spatial Context Information

Inspecting the transition matrix of the HMM (see full transition matrix at **Supplementary Fig. 4**) highlighted the value of incorporating spatial information, as the use of state-to-state transition probabilities were highly non-uniform, with a large majority of transition probabilities between states being very small (83% are below 0.005), with only a handful of important state transitions receiving high probabilities for each state (see top transitions at **Supplementary Fig. 5**). By inspecting the transition matrix, several notable findings emerge:

- Upstream promoter states (states 1-3) are most likely to transition to other promoter states, or to active intergenic states (right panel of **Supplementary Fig. 4**), while downstream promoter states (states 9-11) are more likely to transition to other promoter states or to transcribed states, illustrating the transition from active intergenic to upstream promoter, to downstream promoter, and to transcribed states along the body of the gene. (Note that transitions upstream or downstream along the body of a gene contribute equally to the transition matrix, as no transcriptional directionality was imposed in parsing the genome).
- The repressed promoter state (state 4), is the only state to transition to any of the large-scale repressed states, specifically state 45 (right panel of **Supplementary Fig. 4**).
- State 26 which enriches in transcribed regions but dips relative to exons, transitions most frequently to States 24 and 25 which enrich in exons relative to introns (**Supplementary Figure 24a**). Similarly, repressive states 43 and 44 transition frequently to each other, and also show opposite enrichments relative to exons and introns (**Supplementary Figure 24b**). This suggests perhaps an alternation between exonic and intronic states along the body of genes.
- The CTCF island state (State 39) is found most frequently transitioning to other active intergenic states (particularly States 36-38) as well as the H3K27me3 enriched repressive states (particularity State 43), but interestingly not the H3K9me3 associated repressive states. This may suggest that CTCF, which is thought to act an insulator, is playing a role in insulation within more dynamic regions (involving active marks and the repressive H3K27me3 mark), but not in more stably repressed regions (thought to be associated with heterochromatin and H3K9me3).
- The L1/LTR repeat enriched state (state 47), characterized by a dominant H3K9me3 mark, is found to most frequently transition to the broad H3K27me domains (state 43), suggesting the presence of certain H3K9me3-marked repetitive elements within or adjacent to broader H3K27me3 domains, and thus that even though the two marks typically do not overlap, they may be proximal to each other in the genome at least for these repetitive elements as observed by the transition matrix.
- Lastly, we note that the transition matrix helps define large groups of promoter, transcribed, enhancer, repressed, and repetitive states, with significantly higher within-group transitions than outside-group transitions (right panel of **Supplementary Fig. 4**), and also subgroups within each group with most frequent within-subgroup transitions (boxed areas in left panel of **Supplementary Fig. 4**). These groups and subgroups tend to share many additional biological functions (**Supplementary Table 1**), validating the biological interpretability of the learned transition parameters.

These are just some of the many features of the epigenome that can be extracted by close inspection of the transition matrix, highlighting both its importance in guiding the learning of our model, and also its direct interpretability in understanding the chromatin modification landscape.

It is notable that many of these spatial associations persisted over much longer distances than those reported here for neighboring intervals (**Supplementary Fig. 6**). While the most intense peaks of the transition matrix become more diffuse at longer intervals, strong non-random spatial associations are observed at distances of 2kb, 10kb, and 20kb, revealing substantial pairwise dependencies even at long distances, and further highlighting the importance of incorporating spatial information in the study of chromatin.

## 2. Establishing the number of biologically-relevant chromatin states

We sought to evaluate what number of chromatin states provides an appropriate resolution at which to interpret combinations of chromatin marks and their biological function. While we found distinct functional interpretations for each of 51 chromatin states in the text, additional chromatin marks and additional independent experimental datasets may reveal further meaningful subdivisions, while conversely increasingly finer-grain distinctions provided by additional states may be of decreased biological interest. To address these questions, we took three approaches for studying how distinguishable the 51 chromatin states that we described here are, the extent to which they capture mark co-occurrence patterns, and how frequently they are recovered with varying numbers of states and different initializations for parameter learning.

First, we asked how distinct different chromatin states are from each other in their genome-wide assignments. The probabilistic nature of the multivariate HMM allowed us to directly quantify the likelihood of overlap in the genome-wide assignments of any pair of states. For every location in the genome, we evaluated the posterior probability of each of the 51 states, summed over all possible parses of the genome. We then computed for each state  $i$  its posterior overlap with each state  $j$  defined to be a weighted average of the posterior probabilities of state  $j$  where the weighting is based on the posterior of state  $i$  in the interval. If the chromatin state assignment of a region is not of high confidence, we would expect many different states to all show similar posterior probability that could be as low as 2% for a truly uncertain assignment given 51 states. Instead, we found that on average the model confidence level in the assignment for 49 of the 51 states was at least 50% and for 28 states at least 75% (**Supplementary Fig. 9**). Thus the states described here are distinct both in their biological enrichments and also in their confident assignments.

Second, we evaluated how increasing numbers of states capture the genome-wide dependencies between chromatin marks. If two or more marks work together to define a chromatin state, they should show a strong genome-wide dependencies, namely they should occur more frequently together than one would expect based solely on their total abundance. However, if the chromatin state assignments correctly capture these dependencies and assign regions defined by their combination into the same chromatin state, these marks should then become conditionally independent within those states, namely they should occur together within the state at the frequency dictated by the product of their individual probabilities. Indeed the 51-state model showed pairs of marks occurring as expected by their individual frequencies (**Supplementary Fig. 10**), while models with fewer states showed pairs marks co-occurring more frequently than expected as evidence of un-captured dependencies (**Supplementary Fig. 11**), evidence that the chromatin states defined here have effectively captured pairwise dependencies of chromatin marks by explicitly grouping significant mark combinations in individual states.

Third, we evaluated the consistency of chromatin states in models learned at varying complexity and across different initializations, quantified as the correlation of chromatin mark frequencies obtained for corresponding states across different models (see **Online Methods**). We found that the emission parameters of the 51 states described here were highly correlated with states of the highest-scoring 79-state model (**Supplementary Fig. 12**). In general we found that the states recovered in a model of the nested initialization procedure were also consistently recovered in larger models, which was not the case for random initialized models. For instance based on nested initializations, the CTCF island state was recovered in all models with 24 or more states and the simple repeat enriched state was recovered in all models with at least 35 states, while under the highest scoring of three random initializations there were still models with 69 and 41 states respectively that did not recover these states though some randomly initialized models with fewer states did (**Supplementary Fig. 13**). In several cases when considering increasing sized models learned from nested initializations a jump in the best correlation for a specific state in the 79-state model corresponded to a clear jump in the maximal enrichment for specific types of genomic elements such as Zinc Finger Genes, TG simple repeats, and Transcription End Sites (**Supplementary Fig. 14**). Lastly, we confirmed the 51 chromatin states described here were highly representative of the 510 states obtained after training 10 independent random initializations of 51-state models (**Supplementary Fig. 15**), showing the desirable property of high coverage of local maximum state-space variability.

Overall, the 51 chromatin states described here have captured much of the complexity of a 79-state model with significantly fewer states, thus eliminating potentially redundant states. Moreover, the direct comparison of which biological states are recovered at each number of states enables us to select models that capture biologically-meaningful chromatin states we recognize, while including in an unbiased way all chromatin states captured with them. In our case, we selected a 51-state model which was the first to sufficiently capture the end of transcription state (State 27) (**Supplementary Figure 14**).

### 3. General Validation of Modeling Approach

Upon inspection of the learned model and its parameters, we verified several desirable properties.

- First, we found that the descriptive power of the model was appropriately spent, allocating more states to capture biologically-meaningful complexity in small regions, for example dedicating 11 states (1-11) to capture the subtleties of promoter-associated regions that only cover 1% of the genome, while two states (41 and 43) associated with large-scale repressed regions cover 46% of the genome (**Supplementary Fig. 16**).
- Second, we found that the emission parameters learned showed distinct combinations of chromatin marks, spanning a wide spectrum of combinations (**Supplementary Figs. 2 and 17**).
- Third, we found that the frequency at which the various chromatin marks would be considered detected in the states are highly correlated at the  $10^{-3}$ ,  $10^{-4}$ ,  $10^{-5}$ , and  $10^{-6}$  Poisson distribution thresholds (**Supplementary Table 2 and Supplementary Fig. 18**), indicating that the chromatin mark combinations learned are robust across three orders of magnitude in the probability cutoff.
- Fourth, we found that adjusting our thresholds for each mark locally based on the density of nucleosome tags<sup>1</sup> did not affect the state definitions (**Supplementary Fig. 19**). For each mark, we compared the same sequence tag count as before, but we locally adjusted the mean  $\lambda$  used by the Poisson distribution to calculate the read threshold for each mark. Instead of using the genome average for the mark,  $\lambda$ , we used a scaled genome-wide average, based on the local density of nucleosome reads. Intuitively, we increased  $\lambda$  for an interval if there was an enrichment of nucleosome tags found locally, thus requiring more tags for the mark for it to reach the  $10^{-4}$  threshold. More specifically, we computed the nucleosome-adjusted background by scaling the genome-wide average number of tags for each mark in a given interval  $I$  by the neighborhood nucleosome read count  $c_I$  mapping in a 1kb window centered at the interval  $I$  (applying the same tag-shift procedure for the ChIP-seq data described in the methods), divided by  $c_G$ , the genome average value of  $c_I$ .
- Fifth, we found that chromatin states captured variations in the intensity levels for each chromatin mark in their raw tag count enrichments as well as relative to an IgG control, both of which were highly correlated with the emission parameters of the mark over states (**Supplementary Fig. 20**).
- Lastly, we found even beyond the intensity levels used in making the binary presence/absence decision for each mark, chromatin states capture information on individual mark intensity levels both below and above the tag count thresholds used (**Supplementary Fig. 21**), likely because our model considers both combinations of marks and spatial information. We separately considered the tag enrichments for those intervals for which the mark was called present and absent, and found that in both cases the tag enrichment is higher in states that have the mark called present at higher frequency and lower outside them, correlating highly with the emission parameters.

### 4. Transcription Associated States

The transition frequencies between different transcribed states (**Supplementary Fig. 4**) suggest that these states can be divided into four sub-groups and two additional isolated states, with no transition probability greater than 0.03 between states in different subgroups.

- The first subgroup (states 12-16) is characterized by higher frequency of H3K79me2 and H3K79me3 relative to H3K79me1, and is strongly enriched for 5' proximal region of higher expressed genes (**Figure 3c**). Some of these states also showed enrichment for transcription factors and DNaseI hypersensitive sites making them candidates for being enhancer regions that are also transcribed.

- The second subgroup (states 17-19) is characterized by higher frequency of H3K79me1 relative to H3K79me2 and H3K79me3, and is found on average in 5' proximal region of lower-expression genes.
- The third subgroup (States 20-23) was characterized with lower frequency for H3K79me2 and H3K79me3 and higher frequency of H2BK5me1, H420Kme1, H3K4me1, and various acetylations. These states showed high enrichments for DNaseI hypersensitive regions, GC-rich areas and CpG islands, proximity to both 5' and 3' ends of genes.
- The fourth subgroup (States 24-26) is characterized by relatively high levels of H3K36me3, and is associated with transcribed regions of genes distal to the 5' end (**Figure 3d**).

States 27-28 are discussed in the main text. **Supplementary Table 1** contains a more complete discussion of differences between states in each subgroup.

## 5. Active Intergenic Associated States

The eleven active intergenic states, states 29-39 states can be divided into a group of eight states (States 29-36) associated as being either candidate enhancer regions (states 29-33) or being proximal to them (states 34-36) and three additional states (States 37-39) also not associated with pronounced repression of downstream genes as seen with large scale repressed states, states 41-45 (**Supplementary Fig. 22**).

States 34-36 all had lower enrichments for DNaseI hypersensitive sites and transcription factor binding than states 29-33. Of these states, State 34 was the most enriched for being proximal to some of the strongest candidate enhancer states such as States 29 and 30 (**Supplementary Fig. 6**), as well as on average genes of substantially induced expression levels (**Supplementary Fig. 22**). States 35 and 36 represented acetylation domains most frequently marked by H2AK5ac, H4K91ac, and H3K4ac and were also proximal to candidate enhancer regions and genes with above-average expression.

State 37 represented large domains of low modification frequency that tended to be far from repressed genes. State 38 and 39 would frequently transition to this state (**Supplementary Fig 4**). State 39, corresponds to candidate insulator regions. It showed the highest frequency of CTCF insulator protein binding and enrichment in the associated CTCF motif. It was also enriched for DNaseI hypersensitive sites and transcription factor binding, suggesting potential interactions of CTCF with several other factors either directly in these regions or through looping. State 38 had the highest frequency for H2AZ. State 39 showed strong enrichment for being proximal to two other active intergenic states 31 and 38, both of which had a relatively high frequency for H2AZ (**Supplementary Figs. 2 and 6**), suggesting a potential association between insulators and this histone variants.

## 6. Predictive power comparison with individual mark intensities and alternative methods

We used the recovery of RefSeq TSS and transcribed regions to gauge the importance of using chromatin mark combinations and spatial genomic information in a *de novo* unsupervised learning approach, compared to individual chromatin mark intensities and alternate methodological approaches.

First, we compared the recovery power of chromatin states and of individual chromatin marks at the binary cutoff dictated by our Poisson threshold for both classes of elements. In both cases, we found that chromatin states consistently surpassed all individual chromatin marks (**Figure 5**), and dramatically so for transcribed regions.

- For promoter regions, H3K4me3 provided a very good predictor, capturing 57% of TSS regions in 1.2% of the genome, lacking however the refinement of 11 distinct promoter classes with distinct positional and functional properties (**Figure 5a**).
- For transcribed intervals, no single mark input surpassed 7% recovery while transcribed states together accounted for nearly 40% of transcripts at <3% false positive rate (**Figure 5b**).

We also assessed the discovery power of chromatin marks at varying thresholds, by considering the signal intensity provided by read counts for each chromatin mark (**Supplementary Fig. 32**):

- For promoter regions, while H3K4me3 performed similar to chromatin states at the binary threshold chosen (Poisson cutoff at  $10^{-4}$ ), the full ROC curve at varying signal intensity levels shows that it does not achieve comparable power at higher specificity values (**Supplementary Fig. 32a**). The two other marks most closely associated with promoter regions, Pol2, and H3K9ac, both significantly underperformed chromatin states across the ROC curve.
- For transcribed regions, individual chromatin marks continued to perform significantly below chromatin states, even when varying mark intensity thresholds were considered (**Supplementary Fig. 32b**), again emphasizing the importance of multiple mark combinations and spatial context information.

We next compared chromatin states to two alternative approaches, k-means clustering and logistic regression (**Supplementary Fig. 32c,d**).

- The k-means comparison enabled us to gauge the importance of genomic context information encoded in our transition matrix, by comparing the discovery power of chromatin states to that of a k-means clustering approach with the same input binarization and same number of 51 clusters (**Supplementary Fig. 32c,d**). We found that chromatin states outperformed k-means clustering for both promoter regions (approximately a 20% increase in the true positive rate for a large range of false positive rates), and for transcribed regions (nearly 50% increase in the true positive rate). These results further highlight the importance of spatial context information, especially for long-range features such as transcribed regions.
- We also found that the *de novo* learning of chromatin states did not substantially hurt their performance compared to the supervised learning approach that specifically sought combinations of local chromatin mark signals that maximize prediction of promoter and transcribed locations (**Supplementary Fig. 32c,d**). For promoters, chromatin states performed comparably to a logistic regression supervised learning approach (less than a 4% drop in performance), and for transcribed intervals, they significantly outperformed logistic regression (nearly 25% higher performance despite the *de novo* learning for chromatin states) by being able to take advantage of spatial information despite having no prior knowledge of gene annotations for training.

Method comparison: The k-means clustering was performed using the fastkmeans implementation<sup>2</sup> on the same binarized input used with the HMM, but without any spatial information. The supervised logistic regression predictions were based on the TR-IRLS implementation<sup>3</sup> of logistic regression using the default settings except the cgdeveps parameter was set to 0.0001. The features to the classifier were  $\ln(x+1)$  transformed values of the raw number of tags mapped to a 200bp interval for each mark, and thus had no spatial information. Results for the classifier are based on five-fold cross validation.

## 7. Additive and Combinatorial Relationships of Marks

We sought to understand the importance of different marks and mark combinations in defining chromatin states. This revealed both additive and combinatorial relationships between different chromatin marks. Acetylation marks in promoter states seemed to play a largely additive role, with higher levels of diverse acetylation marks consistently associated with higher expression. However, in active intergenic regions, acetylations showed a more complex behavior, with different combinations of acetylation marks (H2BK120ac, H2BK20ac, H2BK5ac, H3K27ac, H4K8ac, H4K91ac) acting as a primary determinant of candidate enhancer states and differences in downstream expression levels (States 29-33). Methylation marks seemed to play more combinatorial roles in defining chromatin states. One such example is found between H3K9me3, H4K20me3 and H3K36me3 which together help define repetitive states 47/48 and the ZNF-enriched state 28 (**Supplementary Fig. 39**). The enrichment of satellite repeat elements varied dramatically with different combinations of the three marks: State 47 (H3K9me3 alone) showed 0.5-fold enrichment, State 48 (H3K9me3 and H4K20me3) showed 63-fold enrichment, and State 28 (H3K9me3, H4K20me3, and H3K36me3) was back at 0.7-fold enrichment, suggesting a complex relationship that cannot be explained by a strictly additive association of any single mark and repeat elements. Similarly, enrichment for ZNF genes goes from 11-fold in State 47 to 112-fold in State 28 with the

addition of H3K36me3, even though H3K36me3 is found as a dominant mark in states with a substantially weaker enrichment for ZNF genes (e.g. States 24-26).

## 8: Chromatin state recovery using subsets of marks

For the recovery of the chromatin state assignments based on the subset of 10 marks example given in **Supplementary Fig. 39**, we found an average of 77.2% sensitivity and 76.9% specificity averaged across the genome though these values varied dramatically across different states, from above 90% for repressed states 40 (defined by a general lack of marks) and 41 (associated with H3K9me3 but lacking most marks) to below 10% for candidate insulator state 39 (unsurprisingly since its major determinant CTCF was not included in the 10 marks surveyed). With the subset of 10 marks, promoter states 1-11 and candidate enhancer states 29-33 showed on average low sensitivity (48% and 35%, respectively), with the exception of repressed promoter state 4 that showed 72% sensitivity as most of its defining marks were profiled. Large state grouping were generally preserved however, with promoter states recognized as such and candidate enhancer states as such, suggesting that it was the subtleties of different promoter and candidate enhancer states that were lost.

We also evaluated the subset of 39 input datasets that excludes CTCF and PolII, to evaluate how much information lies strictly in histone marks and histone variants alone (**Supplementary Fig. 40**). In particular, we asked to what extent the CTCF island state, TSS and promoter states, and transcribed states could be identified without CTCF and Pol2.

- For the first question, we found that the histone marks alone are likely insufficient to demarcate regions of CTCF binding as only 9% of the state recovered in the absence of CTCF/PolII.
- For the second question, we found that promoter states were strikingly well identified in the absence of PolII/CTCF. 95-100% of promoter states remained promoter states even in the absence of PolII/CTCF information. Moreover, individual promoter states 1-11 preserved their exact identity 88-95% of the time without PolII/CTCF as an input.
- Similarly, all transcribed states were assigned to transcribed states in the absence of PolII/CTCF 97-100% of the time, and all but one preserved their specific state identity 93-99% of the time. The one exception was state 27, the transcription end state, which was recovered only 69% of the time, although it remained assigned to a transcribed state 98% of the time.
- We further assessed whether state 27 still peaked at transcription end sites even when PolII/CTCF were not part of the input features, and indeed state 27 was both the most highly enriched state at TES, and conversely TES regions were where state 27 was most enriched. However, the enrichment was reduced from 12.5-fold to 8.75-fold (becoming comparable to states 21 and 23 that showed enrichments of 8.1 and 8.3 respectively). Without Pol2 information, the peak of state 27 on TES remained but became less pronounced, though its enrichment still precipitously dropped after the end of the transcript (**Supplementary Fig. 41**).
- We further assessed the association of state 27 with transcription end sites in CD36 and CD133 cells, using the subset of 10 marks available in those cell types. This analysis confirmed that in both cell types, state 27 peaked strongly at the TES, further confirming its validity (**Supplementary Fig. 41**).

# Chromatin state characterization

## Promoter states:

| State | Shared State Descriptions                                                                                                                                                                                                                                                                                                                                                                                                                                                                                                                                                                                   |                                                                                                                                                                                                                                                                                                                                                                                                                                                                                                                                                      | State Description with defining marks and candidate biological interpretation                                                                                                                                                                                                                                                                                                                                                                                      |  |
|-------|-------------------------------------------------------------------------------------------------------------------------------------------------------------------------------------------------------------------------------------------------------------------------------------------------------------------------------------------------------------------------------------------------------------------------------------------------------------------------------------------------------------------------------------------------------------------------------------------------------------|------------------------------------------------------------------------------------------------------------------------------------------------------------------------------------------------------------------------------------------------------------------------------------------------------------------------------------------------------------------------------------------------------------------------------------------------------------------------------------------------------------------------------------------------------|--------------------------------------------------------------------------------------------------------------------------------------------------------------------------------------------------------------------------------------------------------------------------------------------------------------------------------------------------------------------------------------------------------------------------------------------------------------------|--|
| 1     | <b>Promoter Upstream States; Potential enhancer looping.</b> State 1-3 had high overall frequency of H3K4me1/2/3, H3K9me1, H2AZ, but had a lower frequency for specific methylation marks such as H3K79me2, H3K79me3, H3K27me1, and H4K20me1 than found in other promoter associated states. These states all enriched in the promoter regions particularly upstream of the TSS. These states are associated with high enrichments for open chromatin and transcription factor binding. A portion of this state may also correspond to distal enhancers also having promoter marks possibly due to looping. | <b>Promoter upstream high expression; Potential enhancer looping.</b> State 1 relative to states 2 and 3 had higher frequency of all acetylation marks. 51% of this state was located within 2kb of a RefSeq annotated transcription start site (TSS), and when found in promoter regions was more likely to be found upstream of the TSS and associated with higher expressed genes. Relative to States 2 and 3 this state had greater enrichments for open chromatin and experimental transcription factor binding except for the repressive NRSF. |                                                                                                                                                                                                                                                                                                                                                                                                                                                                    |  |
| 2     |                                                                                                                                                                                                                                                                                                                                                                                                                                                                                                                                                                                                             | <b>Promoter upstream medium expression; Potential enhancer looping.</b> State 2 had an intermediate frequency for detection of all acetylation marks as compared to states 1 and 3. About 41% of this state was located within 2kb of a RefSeq annotated TSS. When found in promoter regions, this state was more likely to be found upstream of the TSS, but there was less of a bias upstream as compared to State 1. The genes downstream of this state had expression levels in between that of State 1 and 3.                                   |                                                                                                                                                                                                                                                                                                                                                                                                                                                                    |  |
| 3     |                                                                                                                                                                                                                                                                                                                                                                                                                                                                                                                                                                                                             | <b>Promoter upstream low expression; Potential enhancer looping.</b> Relative to states 1 and 2, this state had lower frequency for all acetylations. 52% of this state was located within 2kb of a RefSeq annotated TSS, and when found in promoter regions was almost equally likely to be found upstream and downstream of the TSS. This state was associated with lower expressed genes. Of genes with a TSS most likely in this state, there was an enrichment for cell cycle related genes.                                                    |                                                                                                                                                                                                                                                                                                                                                                                                                                                                    |  |
| 4     | <b>Repressed Promoter.</b> State 4 had the greatest frequency for H3K4me3 relative to other marks in the state. It is distinguished from other promoter states in its very low frequency ( $\leq 0.02$ ) of detection for all acetylations, and its relatively higher frequency for H3K27me3. 57% of this state was within 2kb of a TSS. Genes with this state in its promoter region were generally repressed. This was the most enriched state for the repressive NRSF transcription factor. Genes with a TSS in this state enriched for Gene Ontology categories related to embryonic development.       |                                                                                                                                                                                                                                                                                                                                                                                                                                                                                                                                                      |                                                                                                                                                                                                                                                                                                                                                                                                                                                                    |  |
| 5     | <b>TSS states.</b> States 5-7 had high frequency for H3K4me3 and Pol II, but had lower frequency for H3K4me1 and other methylation marks found in other promoter enriched states. These three states had the highest enrichment for TSS of any states.                                                                                                                                                                                                                                                                                                                                                      | <b>TSS low-medium expression; most GC rich.</b> State 5 compared to states 6 and 7 had a lower frequency for all acetylations. 74% of this state was found within 2kb of a RefSeq annotated transcription start site. This state and genes immediately downstream from it had a lower average expression than state 7 and to a lesser extent state 6. Chromatin is an example of a GO category genes with a TSS in this state had a greater enrichment for than states 6 and 7. Of all states this state had the highest GC content.                 |                                                                                                                                                                                                                                                                                                                                                                                                                                                                    |  |
| 6     |                                                                                                                                                                                                                                                                                                                                                                                                                                                                                                                                                                                                             | <b>TSS medium expression.</b> State 6 had a medium frequency of acetylation relative to states 5 and 7. About 78% of this state is located within 2kb of an annotated transcription start site. The average expression level of this state and genes immediately downstream of it was lower than that of state 7, and slightly higher than that of state 5. Response to DNA stimulus is an example of a GO category genes with a TSS in this state had a greater enrichment for than states 5 and 7.                                                 |                                                                                                                                                                                                                                                                                                                                                                                                                                                                    |  |
| 7     |                                                                                                                                                                                                                                                                                                                                                                                                                                                                                                                                                                                                             | <b>TSS high expression.</b> State 7 relative to States 5 and 6 had a higher frequency for all acetylations. This state was 89% within 2kb of a RefSeq annotated TSS. The genes in this state were on average higher expressed than states 5 and 6. RNA processing is an example of a GO category genes with a TSS in this state had a greater enrichment for than states 5 and 6.                                                                                                                                                                    |                                                                                                                                                                                                                                                                                                                                                                                                                                                                    |  |
| 8     | <b>Transcribed Promoter States.</b> State 8-11 had high frequency H3K4me3 and for some or all of the methylations H3K4me1/2, H3K9me1, H3K79me1/2/3, H3K27me1, H2BK5me1, and H4K20me1. These states were all enriched in the promoter region particularly downstream of the TSS. These four states had higher average expression than the other promoter associated states.                                                                                                                                                                                                                                  | <b>Transcribed promoter highest expression.</b> State 8 and 9 had a higher frequency for H3K79me2/3, a lower frequency for most other methylations, and higher average expression than states 10 and 11.                                                                                                                                                                                                                                                                                                                                             | <b>Transcribed promoter; highest expression, TSS for T-cell activation genes.</b> State 8 had higher frequency of acetylations than state 9. State 8 was 71.5% within 2kb of a RefSeq annotated TSS. Relative to state 9 this state was found closer to the TSS and had higher enrichments for transcription factor binding and open chromatin. The genes with TSS most likely in this state enriched for cell type specific categories such as T-cell activation. |  |
| 9     |                                                                                                                                                                                                                                                                                                                                                                                                                                                                                                                                                                                                             |                                                                                                                                                                                                                                                                                                                                                                                                                                                                                                                                                      | <b>Transcribed promoter; highest expression, downstream.</b> State 9 had lower frequency of acetylations than state 8. State 9 was 41% within 2kb of a RefSeq annotated TSS. This state was more likely to be found downstream of the TSS. This state had the highest average expression of any state. Relative to state 8 it was found even further downstream of the TSS and had lower enrichments for transcription factor binding and open chromatin.          |  |
| 10    |                                                                                                                                                                                                                                                                                                                                                                                                                                                                                                                                                                                                             | <b>Transcribed promoter high expression.</b> State 10 and 11 had a lower frequency for H3K79me2/3, a higher frequency for most other methylations, and lower average expression than states 8 and 9.                                                                                                                                                                                                                                                                                                                                                 | <b>Transcribed promoter; high expression, near TSS.</b> State 10 had higher frequency for acetylations as compared to state 11. State 10 was found closer to the TSS than state 11, and had higher relative enrichments for transcription factor binding and open chromatin.                                                                                                                                                                                       |  |
| 11    |                                                                                                                                                                                                                                                                                                                                                                                                                                                                                                                                                                                                             |                                                                                                                                                                                                                                                                                                                                                                                                                                                                                                                                                      | <b>Transcribed promoter; high expression, downstream.</b> State 11 had lower frequency for acetylations as compared to state 10. State 11 was found further from the TSS than states 10, and had lower relative enrichments for transcription factor binding and open chromatin.                                                                                                                                                                                   |  |

## Transcribed States:

|    |                                                                                                                                                                                                                                                                                                                                                                                                                                                                                                                                                                                                     |                                                                                                                                                                                                                                         |                                                                                                                                                                                                                                                                                                                                                                                                                                                                                                 |
|----|-----------------------------------------------------------------------------------------------------------------------------------------------------------------------------------------------------------------------------------------------------------------------------------------------------------------------------------------------------------------------------------------------------------------------------------------------------------------------------------------------------------------------------------------------------------------------------------------------------|-----------------------------------------------------------------------------------------------------------------------------------------------------------------------------------------------------------------------------------------|-------------------------------------------------------------------------------------------------------------------------------------------------------------------------------------------------------------------------------------------------------------------------------------------------------------------------------------------------------------------------------------------------------------------------------------------------------------------------------------------------|
| 12 | <b>Transcribed 5'proximal States.</b><br>States 12-16 had low frequency for H3K4me3, higher frequency of H3K79me2/3 relative to H3K79me1, and would frequently transition between each other. As a group these five states tended to be relatively proximal to the 5' end of genes and higher expressed.                                                                                                                                                                                                                                                                                            | <b>Higher expression.</b> States 12 and 13 relative to 14-16 had higher frequency for a number of methylation marks including H3K4me1, H3K4me2, H3K9me1, H3K79me1, H3K27me1, H2BK5me1, and H4K20me1 and were more highly expressed.     | <b>Transcribed 5'proximal; higher expression, open chromatin, TF binding, candidate enhancer.</b> State 12 relative to state 13 had higher frequency for all acetylations and greater enrichment for open chromatin and transcription factor binding.                                                                                                                                                                                                                                           |
| 13 |                                                                                                                                                                                                                                                                                                                                                                                                                                                                                                                                                                                                     |                                                                                                                                                                                                                                         | <b>Transcribed 5'proximal; higher expression, open chromatin, candidate weak enhancer.</b> State 13 relative to state 12 had lower frequency for all acetylations and open chromatin and transcription factor binding.                                                                                                                                                                                                                                                                          |
| 14 |                                                                                                                                                                                                                                                                                                                                                                                                                                                                                                                                                                                                     | <b>High and medium expression.</b> States 14-16 relative to 12-13 had lower frequency for a number of methylation marks including H3K4me1, H3K4me2, H3K9me1, H3K79me1, H3K27me1, H2BK5me1, and H4K20me1 and were less highly expressed. | <b>Transcribed 5'proximal; high expression, open chromatin; candidate enhancer.</b> State 14 relative to states 15 and 16 had higher frequency for acetylations and H3K4me1, and also greater enrichment for open chromatin and transcription factor binding.                                                                                                                                                                                                                                   |
| 15 |                                                                                                                                                                                                                                                                                                                                                                                                                                                                                                                                                                                                     |                                                                                                                                                                                                                                         | <b>Transcribed 5' proximal; high expression.</b> State 15 had lower acetylation frequencies than state 14 and consistently higher methylation frequencies than state 16. State 15 had lower enrichments for open chromatin and transcription factor binding than state 14, and had higher expression than state 16. The enrichment for Alu repeat elements was between that of state 14 and 16.                                                                                                 |
| 16 |                                                                                                                                                                                                                                                                                                                                                                                                                                                                                                                                                                                                     |                                                                                                                                                                                                                                         | <b>Transcribed 5' proximal; medium expression, Alu repeats.</b> State 16 had lower detected acetylation and methylation frequencies than states 14 and 15. This state had lower average expression, lower enrichments for open chromatin and transcription factor binding, and was the most enriched of all states for Alu repeat elements.                                                                                                                                                     |
| 17 | <b>Transcribe less 5' proximal States.</b> States 17-19 all had low frequency for H3K4me3, higher frequency for H3K79me1 relative to H3K79me2 and H3K79me3 and would frequently transition between each other. These states were also found relatively proximal to the 5' end of genes, but to a lesser extent than States 17-19. These states were more likely associated with lower expressed genes.                                                                                                                                                                                              |                                                                                                                                                                                                                                         | <b>Transcribed less 5'proximal, medium expression; open chromatin; candidate weak enhancer.</b> State 17 relative to States 18 and 19 had a higher frequency for methylation marks such as H3K4me1/2, H3K9me1, H3K79me1/2/3, H3K27me1, H2BK5me1, H4K20me1, H3K36me3, and acetylations. State 17 relative to States 18 and 19 had higher average expression, greater open chromatin and transcription factor binding enrichments, and fewer Alu repeat elements.                                 |
| 18 |                                                                                                                                                                                                                                                                                                                                                                                                                                                                                                                                                                                                     |                                                                                                                                                                                                                                         | <b>Transcribed less 5' proximal, medium expression.</b> State 18 had low frequency for acetylations, and relative to States 17 and 19 had an intermediate frequency for methylation marks such as H3K4me1/2, H3K9me1, H3K79me1/2/3, H3K27me1, H2BK5me1, H4K20me1, H3K36me3. State 18 relative to States 17 and 19 had an intermediate average expression level, intermediate open chromatin and transcription factor binding enrichments, and intermediate enrichments for Alu repeat elements. |
| 19 |                                                                                                                                                                                                                                                                                                                                                                                                                                                                                                                                                                                                     |                                                                                                                                                                                                                                         | <b>Transcribed less 5' proximal, lower expression; Alu repeats.</b> State 19 had low frequency for acetylations, and relative to States 18 and 19 had lower frequency for methylation marks such as H3K4me1/2, H3K9me1, H3K79me1/2/3, H3K27me1, H2BK5me1, H4K20me1, H3K36me3. State 19 relative to States 17 and 18 had a lower average expression level, lower open chromatin and transcription factor binding enrichments, and greater enrichments for Alu repeat elements.                   |
| 20 | <b>Candidate strong enhancer in transcribed regions.</b> State 20 had the highest frequency for H3K4me1/2, H3K9me1, and various acetylations and to a lesser extent other methylations such as H2BK5me1, H4K20me1, H3K79me1, H3K27me1. This state had the greatest enrichment for open chromatin and transcription factor binding among the transcribed states. This state had higher GC levels than all transcribed states except States 21-23. States 21-22 had a higher frequency for this state than H2BK5me1 and H4K20me1, but lower frequency for H3K4me1, H3K4me2, and various acetylations. |                                                                                                                                                                                                                                         |                                                                                                                                                                                                                                                                                                                                                                                                                                                                                                 |
| 21 | <b>Spliced exons/GC Rich.</b><br>States 21-23 all had relatively high frequency for H4K20me1, H2BK5me1, and H3K79me1 relative to most other modifications in the state. These states enriched for regions of the genome that are GC-rich and contained spliced exons                                                                                                                                                                                                                                                                                                                                |                                                                                                                                                                                                                                         | <b>Spliced exons/GC Rich; open chromatin, TF binding; candidate enhancer.</b> State 21 relative to States 22 and 23 had higher frequency for H3K4me1, H3K9me1, and acetylations and showed greater enrichments for open chromatin and transcription factor binding. Relative to State 20 it had higher frequency for H2BK5me1 and H4K20me1, and had greater enrichments for GC-rich areas and spliced exons.                                                                                    |
| 22 |                                                                                                                                                                                                                                                                                                                                                                                                                                                                                                                                                                                                     |                                                                                                                                                                                                                                         | <b>Spliced exons/GC Rich.</b> State 22 relative to State 21 had a lower frequency H3K4me1 and various acetylations, and was less likely to contain open chromatin and detected transcription factor binding. Relative to State 23 this state was on average higher expressed and less likely to contain Alu repeat elements.                                                                                                                                                                    |
| 23 |                                                                                                                                                                                                                                                                                                                                                                                                                                                                                                                                                                                                     |                                                                                                                                                                                                                                         | <b>Spliced exons/GC Rich; Alu repeats.</b> State 23 relative to States 21 and 22 had lower frequency of detection of all marks, and had lower average expression and was more likely to contain Alu repeat elements.                                                                                                                                                                                                                                                                            |
| 24 | <b>Transcribed 5' Distal States.</b> States 24-26 all share H3K36me3, H3K27me1, and H2BK5me1 as the three most frequent marks in that order and frequently transition with each other. These three states are found more often in genic locations that are distal to the 5' end of the gene.                                                                                                                                                                                                                                                                                                        |                                                                                                                                                                                                                                         | <b>Transcribed 5' distal; exons.</b> State 24 relative to states 25 and 26 had the highest absolute frequency for marks other than H3K36me3 such as H3K27me1 and H2BK5me1. Of these three states this state had the highest average expression and the least relative bias away from 5' ends of genes.                                                                                                                                                                                          |
| 25 |                                                                                                                                                                                                                                                                                                                                                                                                                                                                                                                                                                                                     |                                                                                                                                                                                                                                         | <b>Transcribed Further 5' distal; exons.</b> State 25 relative to State 24 was found at locations more distal to the 5' end of a gene and relative to State 26 was more likely to be found overlapping exons.                                                                                                                                                                                                                                                                                   |
| 26 |                                                                                                                                                                                                                                                                                                                                                                                                                                                                                                                                                                                                     |                                                                                                                                                                                                                                         | <b>Transcribed 5' distal; Alu repeats.</b> State 26 relative to states 24 and 25 was less likely to correspond to exons relative to introns, and more likely to overlap Alu repeat elements.                                                                                                                                                                                                                                                                                                    |
| 27 | <b>End of Transcription; exons; high expression.</b> State 27 had the highest frequency for the detection of H3K36me3, H4K20me1, and PolII marks, but low frequency for a number of other marks found with these marks in other states. This state had the highest average expression of the non-promoter associated states, and of any state the greatest enrichment for spliced exons, transcription end sites, and the 3'UTR region of genes.                                                                                                                                                    |                                                                                                                                                                                                                                         |                                                                                                                                                                                                                                                                                                                                                                                                                                                                                                 |
| 28 | <b>ZNF Genes; KAP1 repressed state.</b> State 28 had the highest frequency for H4K20me3, H3K36me3, and H3K9me3. This state was associated with ZNF genes and KAP1 binding.                                                                                                                                                                                                                                                                                                                                                                                                                          |                                                                                                                                                                                                                                         |                                                                                                                                                                                                                                                                                                                                                                                                                                                                                                 |

## Active intergenic states:

|    |                                                                                                                                                                                                                                                                                                                                                                                                                                                                                                                                                                                                                                                                                                                 |                                                                                                                                                                                                                                                                                                                                                                                                                                                                                                                      |
|----|-----------------------------------------------------------------------------------------------------------------------------------------------------------------------------------------------------------------------------------------------------------------------------------------------------------------------------------------------------------------------------------------------------------------------------------------------------------------------------------------------------------------------------------------------------------------------------------------------------------------------------------------------------------------------------------------------------------------|----------------------------------------------------------------------------------------------------------------------------------------------------------------------------------------------------------------------------------------------------------------------------------------------------------------------------------------------------------------------------------------------------------------------------------------------------------------------------------------------------------------------|
| 29 | <b>Candidate strong distal enhancer states.</b> States 29 and 30 both had relatively high frequency for H3K4me1 and various acetylations compared to other marks in the state. These states showed high enrichments for open chromatin and transcription factor binding enrichments except in some cases for the repressive NRSF. Genes located downstream from states 29 and 30 had among the highest average expression levels of the active intergenic states. Combined this suggests many locations within this state likely represent active enhancers.                                                                                                                                                    | <b>Candidate strong distal enhancer; higher open chromatin; higher target expression.</b> State 29 relative to State 30 had higher frequency for all acetylations and H3K4me1. Compared with State 30 this state had a higher frequency for detecting acetylations as well as higher open chromatin enrichments, higher enrichments in most transcription factor binding experiments, and a higher GC content.                                                                                                       |
| 30 |                                                                                                                                                                                                                                                                                                                                                                                                                                                                                                                                                                                                                                                                                                                 | <b>Candidate strong distal enhancer; high open chromatin; higher target expression.</b> State 30 had highest frequency relative to other marks in the state for detecting H3K4me1 and specific acetylations, such as H2BK5ac, H3K27ac, and H2BK120ac, though this frequency was lower than in State 29. Compared with State 29 this state had lower frequency for detecting acetylations it showed lower open chromatin, lower enrichments in most transcription factor binding experiments, and a lower GC content. |
| 31 | <b>Intergenic H2AZ with open chromatin/TF binding; Candidate distal enhancer.</b> State 31 had H2AZ, H4K8ac, H4K5ac, and H3K4me1 as the most frequent marks. This state had higher frequency for H2AZ and H4K8ac than both States 29 and 30. This state showed enrichment for open chromatin and transcription factor binding on the same order of State 29 and State 30, however downstream genes of this state did not display as high an average expression level. Compared to States 29 and 30 this state was even more likely to fall outside of annotated genes. This state enriched for being proximal to the CTCF island state (State 39), but a large portion was also found proximal to other states. |                                                                                                                                                                                                                                                                                                                                                                                                                                                                                                                      |
| 32 | <b>Candidate weaker distal enhancer.</b> State 32 had a similar H3K4me1 frequency as found in States 30 and 31, but differed in the relative frequency of specific acetylations with H4K91ac and H2BK20ac being the most frequent in this state. While this state enriched for open chromatin and in some transcription factor binding experiments, the enrichment was lower than what was seen in States 29-31 and 33, and there were also fewer transcription factors enriched for conserved motifs.                                                                                                                                                                                                          |                                                                                                                                                                                                                                                                                                                                                                                                                                                                                                                      |
| 33 | <b>Candidate distal enhancer.</b> State 33 had a relatively high frequency of H3K4me1 compared to the other marks in this state, and lower acetylation levels than States 29-32. This state showed enrichment for open chromatin lower than in states 29-31, but higher than in 32.                                                                                                                                                                                                                                                                                                                                                                                                                             |                                                                                                                                                                                                                                                                                                                                                                                                                                                                                                                      |
| 34 | <b>Proximal to active enhancers; Alu repeats.</b> State 34 had low frequency for a number of methylations and acetylations. This state was enriched proximal to the intergenic candidate enhancer states. Genes downstream from this state had higher average expression levels than States 31-33. This state had lower enrichments for detected open chromatin, transcription factor binding as compared to States 29-33, while having greater enrichments for Alu repetitive elements.                                                                                                                                                                                                                        |                                                                                                                                                                                                                                                                                                                                                                                                                                                                                                                      |
| 35 | <b>Active intergenic regions not enhancer specific.</b> State 35 had the highest frequency for acetylations such as H2AK5ac, H4K91ac, H3K4ac, and H2BK20ac relative to other marks in the state. These marks were also among the most frequent in State 32, but this state had lower absolute frequencies for these acetylations and also had limited detection of H3K4me1. The enrichment for open chromatin and overall for transcription factor binding was lower than found in States 29-33. In comparison to state 34 this state had lower enrichments for neighboring the stronger intergenic candidate enhancer states. Genes downstream of this state also had a lower average expression than 34.      |                                                                                                                                                                                                                                                                                                                                                                                                                                                                                                                      |
| 36 | <b>Active intergenic further from enhancers; Alu repeats.</b> State 36 as with state 35 had the highest relatively frequency for the acetylation marks H2AK5ac, H4K91ac, H3K4ac, but at lower absolute levels. In comparison to State 35, this state had even lower frequency for detected open chromatin and transcription factor binding, and higher levels of Alu repetitive elements. This state had lower enrichments for neighboring intergenic candidate enhancers than States 34 or 35.                                                                                                                                                                                                                 |                                                                                                                                                                                                                                                                                                                                                                                                                                                                                                                      |
| 37 | <b>Non-repressive intergenic domains; Alu repeats.</b> State 37 had relatively low level of detection of all marks and represented a large 11.0% of the genome. While the absolute mark frequency was also low in the three larger states: 40, 41, and 43 the transitions transition probabilities for this state was distinct, allowing small absolute differences in mark frequency to become significant over broad domains. Functionally genes near this state had higher average expression than states 40-45, but lower than States 29-36. This state had lower enrichments for being proximal to the intergenic candidate enhancer states than States 29-36, but higher than States 40-45.               |                                                                                                                                                                                                                                                                                                                                                                                                                                                                                                                      |
| 38 | <b>H2AZ specific state.</b> State 38 had the highest frequency for H2AZ relative to other marks in this state. Relative to State 31 which also had H2AZ as the most frequently detected mark, the acetylations in this state were lower and there was lower enrichment for open chromatin and transcription factor binding. This state was found enriched near CTCF islands states, but a large portion was also found next to other states.                                                                                                                                                                                                                                                                    |                                                                                                                                                                                                                                                                                                                                                                                                                                                                                                                      |
| 39 | <b>CTCF Island; Candidate Insulator.</b> State 39 was most frequently associated with CTCF and to a lesser extent H2AZ. CTCF is an insulator binding protein and while also found in promoter enriched states, the vast majority of CTCF in this state was found distal to promoters.                                                                                                                                                                                                                                                                                                                                                                                                                           |                                                                                                                                                                                                                                                                                                                                                                                                                                                                                                                      |

## Repressed states:

|    |                                                                                                                                                                                                                                                                                                                                                                                                                                                                                                                                                                                             |
|----|---------------------------------------------------------------------------------------------------------------------------------------------------------------------------------------------------------------------------------------------------------------------------------------------------------------------------------------------------------------------------------------------------------------------------------------------------------------------------------------------------------------------------------------------------------------------------------------------|
| 40 | <b>Unmappable.</b> State 40 had all emission frequencies <0.0010 and a very high self-transition parameter. This state also showed a severe depletion in an IgG control experiment. This state corresponds to large segments of the genome which cannot be interrogated using the ChIP-seq technology, either because the sequence is not available or is duplicated across the genome.                                                                                                                                                                                                     |
| 41 | <b>Heterochromatin; Nuclear Lamina; Most A/T rich.</b> State 41 represented large domains covering 23.3% of the genome with H3K9me3 the most frequently detected mark, but at a low absolute frequency. This was the most A/T rich state, showed strong depletion for promoter regions and genes, genes within this state were repressed, and with State 42 showed the greatest correspondence with the nuclear lamina and the darkest staining chromosomal bands. This state was more gene depleted compared to States 43-45.                                                              |
| 42 | <b>Heterochromatin; Nuclear Lamina; ERVL repeats.</b> State 42 was often flanked by State 41, and as with State 41 was also associated with gene depletion and repression. State 42 relative to 41 was more likely to be marked by H3K27me2, H3K9me2, H4K20me3, and H3R2me2. The enrichments for repetitive elements differed between this state and State 41. This state showed the strongest enrichment for ERVL repetitive elements of any state including State 41, while being less likely to mark an L1 repetitive element than State 41.                                             |
| 43 | <b>Heterochromatin.</b> State 43 represented large domains covering 22.3% of the genome with H3K27me3 as the most frequently detected mark, but at a low absolute frequency. The genes in this state were on average repressed, but relative to State 41 had less depletion for promoter regions and genes.                                                                                                                                                                                                                                                                                 |
| 44 | <b>Heterochromatin; Nuclear Lamina; Less exon depleted.</b> State 44 was often flanked by State 43, and as with State 43 was associated with gene repression and less gene depletion compared to states 41 and 42. Compared to State 43 this state was more likely to have detected H3K27me3 with higher frequency and also for other marks such as H3K27me2, H3R2me1, H3K36me1, and/or H3R2me2. State 44 was more likely to contain ERVL repetitive elements and less likely to contain L1 elements than state 43. State 44 also more likely than State 43 to be found near spliced exons. |
| 45 | <b>Specific Repression.</b> State 45 represented regions of relative higher frequency of detecting H3K27me3. This state contrasts with State 44 both in its more frequent self-transitions as compared to transitions to State 43 as well as the lower frequency for the other marks such as H3K27me2. This state showed enrichment for TSS of genes, though it was less specific to promoter regions as compared to State 4. Genes in this state were repressed genes and the TSS of genes most likely falling in this state enriched for embryonic development related genes.             |

## Repetitive states:

|    |                                                                                                                                                                                                                                                                                                                                                                          |                                                                                                                                                                                                                                                                          |                                                                                                                                                                                                                                                                                           |
|----|--------------------------------------------------------------------------------------------------------------------------------------------------------------------------------------------------------------------------------------------------------------------------------------------------------------------------------------------------------------------------|--------------------------------------------------------------------------------------------------------------------------------------------------------------------------------------------------------------------------------------------------------------------------|-------------------------------------------------------------------------------------------------------------------------------------------------------------------------------------------------------------------------------------------------------------------------------------------|
| 46 | <b>Simple repeats (CA)<sub>n</sub>, (TG)<sub>n</sub>.</b> State 46 had the highest frequency for H2BK5me1 and H3R2me1. This state showed strong enrichments for simple repeat elements particularly (CA) <sub>n</sub> , (TG) <sub>n</sub> , and (CATG) <sub>n</sub> repeats.                                                                                             |                                                                                                                                                                                                                                                                          |                                                                                                                                                                                                                                                                                           |
| 47 | <b>L1/LTR Repeats.</b> State 47 had the highest frequency for H3K9me3. These locations of H3K9me3 are found within or bordering domains of H3K27me3 as evidenced by states 43 and 45 being the majority of non-self transitions, which also differentiates it from the broader H3K9me3 associated state 41. This state shows a specific enrichment for LINE/LTR repeats. |                                                                                                                                                                                                                                                                          |                                                                                                                                                                                                                                                                                           |
| 48 | <b>Satellite Repeats.</b> States (48-51) were all marked by H4K20me3 and H3K9me3, but did not have the highly specific ZNF signature found in State 28. These four states all strongly enriched for Satellite repeats.                                                                                                                                                   | <b>Satellite Repeat.</b> Out of States 48-51, only in State 48 was there low frequency of all other marks besides H3K9me3 and H4K20me3 and no substantial bias detected in an IgG control experiment.                                                                    |                                                                                                                                                                                                                                                                                           |
| 49 |                                                                                                                                                                                                                                                                                                                                                                          | <b>Satellite Repeat; mapping bias.</b> States 49 -51 showed several additional marks detected, and all enriched based on IgG control. Locations within these states likely reflect sequences in the genome which are non-unique, but are unique in the reference genome. | <b>Satellite Repeat; moderate mapping bias.</b> Compared to states 50 and 51 this state had fewer additional marks detected and a lower relative bias in the IgG control.                                                                                                                 |
| 50 |                                                                                                                                                                                                                                                                                                                                                                          |                                                                                                                                                                                                                                                                          | <b>Satellite Repeat; high mapping bias.</b> Compared to states 49 and 51 this state had intermediate frequencies for additional marks detected and enrichment in an IgG control.                                                                                                          |
| 51 |                                                                                                                                                                                                                                                                                                                                                                          |                                                                                                                                                                                                                                                                          | <b>Satellite Repeat/rRNA; extreme mapping bias.</b> Compared to states 49 and 50 this state had the highest frequencies for additional marks detected and enrichment in an IgG control. This state in addition to enriching for Satellite repeats also had a notable enrichment for rRNA. |

**Supplementary Table 1: Chromatin state characterization.** Defining chromatin marks and biological interpretation summary for each chromatin state, summarizing key findings for reference. When groups of states share marks or candidate biological functions, these are grouped into left-most columns, and their specific differences are discussed in right-most columns.

| Mark      | Number of Tags<br>(in Millions) | Threshold | % 200 bp Intervals<br>Called '1' | % Tags in Called '1'<br>Interval |
|-----------|---------------------------------|-----------|----------------------------------|----------------------------------|
| H3K4me3   | 16.85                           | 7         | 1.28                             | 47.8                             |
| H3K36me3  | 13.57                           | 6         | 2.34                             | 26.0                             |
| H3K4me1   | 11.32                           | 6         | 2.59                             | 49.4                             |
| H4K20me1  | 11.02                           | 6         | 2.80                             | 57.5                             |
| H3K27me1  | 10.05                           | 5         | 1.53                             | 14.7                             |
| H3K9me2   | 9.78                            | 5         | 0.60                             | 5.9                              |
| H3R2me1   | 9.56                            | 5         | 0.67                             | 6.8                              |
| H3K9me1   | 9.31                            | 5         | 2.56                             | 34.4                             |
| H3K27me2  | 9.07                            | 5         | 0.65                             | 6.7                              |
| H3K27me3  | 8.97                            | 5         | 0.86                             | 8.7                              |
| H2BK5me1  | 8.94                            | 5         | 2.45                             | 41.2                             |
| H3K36me1  | 8.08                            | 5         | 0.31                             | 3.9                              |
| H2AZ      | 7.54                            | 5         | 1.37                             | 31.2                             |
| H4R3me2   | 7.36                            | 5         | 0.18                             | 4.2                              |
| H4K16ac   | 7.06                            | 5         | 0.42                             | 6.1                              |
| H3R2me2   | 6.52                            | 4         | 0.67                             | 8.7                              |
| H3K9me3   | 6.35                            | 4         | 1.29                             | 18.4                             |
| H3K79me3  | 5.93                            | 4         | 2.39                             | 57.8                             |
| H4K20me3  | 5.72                            | 4         | 0.80                             | 38.6                             |
| H3K4me2   | 5.45                            | 4         | 1.74                             | 35.7                             |
| H3K79me1  | 5.14                            | 4         | 2.27                             | 37.2                             |
| H3K79me2  | 4.71                            | 4         | 2.11                             | 57.4                             |
| H3K36ac   | 4.37                            | 4         | 0.74                             | 19.3                             |
| H4K8ac    | 4.28                            | 4         | 0.90                             | 19.9                             |
| H3K18ac   | 4.25                            | 4         | 1.36                             | 37.9                             |
| PolII     | 4.15                            | 4         | 0.96                             | 29.2                             |
| H4K5ac    | 4.12                            | 4         | 0.99                             | 23.9                             |
| H2BK20ac  | 4.08                            | 4         | 1.27                             | 33.7                             |
| H3K9ac    | 3.95                            | 4         | 0.51                             | 19.7                             |
| H3K14ac   | 3.80                            | 4         | 0.12                             | 2.5                              |
| H4K12ac   | 3.68                            | 4         | 0.36                             | 7.1                              |
| H2BK12ac  | 3.62                            | 4         | 0.63                             | 17.8                             |
| H3K4ac    | 3.55                            | 3         | 1.54                             | 34.1                             |
| H2BK120ac | 3.44                            | 3         | 1.63                             | 46.3                             |
| H2AK5ac   | 3.44                            | 3         | 1.30                             | 21.9                             |
| H3K27ac   | 3.43                            | 3         | 1.51                             | 51.6                             |
| H2BK5ac   | 3.33                            | 3         | 1.36                             | 51.8                             |
| H4K91ac   | 3.19                            | 3         | 1.79                             | 53.0                             |
| CTCF      | 2.95                            | 3         | 0.68                             | 35.5                             |
| H3K23ac   | 2.53                            | 3         | 0.51                             | 10.8                             |
| H2AK9ac   | 2.07                            | 3         | 0.41                             | 11.2                             |

**Supplementary Table 2: Sequence tag thresholds for binarization of each chromatin mark input signal.** This table indicates for each chromatin mark the number of sequence tags available for that the mark in millions, the threshold number of tags for which that mark was called present (e.g. 7 or more tags for H3K4me3 results in '1'), the percentage of 200bp intervals called '1' in the input for that mark, and the percentage of tags which fell in a bin called '1'. These thresholds were selected using a Poisson background model, such that a bin was called '1' for a mark if the probability of more sequence tags mapping to the interval was less than  $<10^{-4}$ .



|    | state | H3K14ac | H3K23ac | H4K12ac | H2AK9ac | H4K16ac | H2AK5ac | H4K91ac | H3K4ac | H2BK20ac | H3K18ac | H2BK120ac | H3K27ac | H2BK5ac | H2BK12ac | H3K36ac | H4K5ac | H4K8ac | H3K9ac | PoII | CTCF | H2AZ | H3K4me3 | H3K4me2 | H3K4me1 | H3K9me1 | H3K79me3 | H3K79me2 | H3K79me1 | H3K27me1 | H2BK5me1 | H4K20me1 | H3K36me3 | H3K36me1 | H3R2me1 | H3R2me2 | H3K27me2 | H3K27me3 | H4R3me2 | H3K9me2 | H3K9me3 | H4K20me3 |      |
|----|-------|---------|---------|---------|---------|---------|---------|---------|--------|----------|---------|-----------|---------|---------|----------|---------|--------|--------|--------|------|------|------|---------|---------|---------|---------|----------|----------|----------|----------|----------|----------|----------|----------|---------|---------|----------|----------|---------|---------|---------|----------|------|
| 1  |       | 3.8     | 23.6    | 24.2    | 18.0    | 37.7    | 25.5    | 95.2    | 94.8   | 94.3     | 99.2    | 99.6      | 99.7    | 98.9    | 79.1     | 88.6    | 93.6   | 86.9   | 83.6   | 51.6 | 15.7 | 87.5 | 94.2    | 93.8    | 64.2    | 87.0    | 3.8      | 3.3      | 12.0     | 19.4     | 11.6     | 3.8      | 0.5      | 2.6      | 1.9     | 2.1     | 0.2      | 0.1      | 0.2     | 0.5     | 0.1     | 1.8      |      |
| 2  |       | 2.5     | 17.5    | 9.2     | 3.2     | 5.9     | 6.3     | 44.6    | 44.4   | 47.0     | 73.2    | 74.1      | 85.9    | 71.2    | 22.1     | 33.5    | 61.9   | 63.3   | 35.4   | 18.1 | 10.9 | 91.2 | 86.7    | 90.4    | 66.9    | 78.3    | 2.4      | 2.2      | 7.9      | 17.6     | 8.7      | 2.3      | 0.6      | 2.2      | 1.7     | 1.5     | 0.4      | 0.5      | 0.2     | 0.4     | 0.1     | 1.4      |      |
| 3  |       | 0.5     | 5.8     | 1.8     | 1.0     | 0.9     | 1.2     | 12.3    | 9.5    | 8.8      | 22.6    | 21.3      | 22.8    | 12.1    | 2.2      | 4.2     | 8.4    | 12.8   | 7.1    | 11.2 | 16.3 | 77.1 | 93.9    | 80.3    | 45.6    | 74.2    | 1.5      | 1.3      | 4.6      | 4.3      | 7.0      | 8.8      | 0.2      | 1.4      | 2.1     | 1.5     | 0.2      | 2.1      | 0.1     | 0.1     | 0.1     | 1.2      |      |
| 4  |       | 0.1     | 0.8     | 0.1     | 0.4     | 0.3     | 0.2     | 1.5     | 0.9    | 0.7      | 2.1     | 2.1       | 0.5     | 0.2     | 0.1      | 0.1     | 0.1    | 0.3    | 0.3    | 1.9  | 6.2  | 19.0 | 77.9    | 20.8    | 21.1    | 26.4    | 0.3      | 0.0      | 0.1      | 0.0      | 1.3      | 14.9     | 0.1      | 0.2      | 1.4     | 0.9     | 0.0      | 10.2     | 0.1     | 0.1     | 0.4     | 1.3      |      |
| 5  |       | 0.0     | 0.2     | 0.8     | 1.3     | 2.0     | 0.4     | 26.6    | 12.6   | 6.7      | 15.8    | 23.1      | 26.8    | 24.3    | 1.5      | 4.3     | 0.9    | 1.4    | 7.7    | 53.5 | 20.6 | 21.8 | 87.0    | 11.2    | 2.7     | 15.7    | 6.3      | 3.8      | 2.5      | 0.0      | 5.5      | 14.2     | 0.0      | 0.3      | 0.2     | 0.6     | 0.0      | 0.0      | 0.0     | 0.1     | 0.0     | 1.5      |      |
| 6  |       | 0.1     | 1.8     | 3.6     | 6.9     | 6.1     | 1.9     | 74.5    | 63.5   | 53.0     | 75.7    | 84.3      | 89.4    | 86.7    | 20.8     | 41.5    | 20.5   | 21.6   | 62.7   | 69.2 | 25.5 | 61.2 | 98.3    | 37.4    | 7.1     | 40.3    | 5.3      | 2.7      | 5.6      | 0.6      | 6.0      | 11.6     | 0.0      | 0.5      | 0.4     | 0.9     | 0.0      | 0.0      | 0.0     | 0.0     | 0.1     | 1.6      |      |
| 7  |       | 1.2     | 8.7     | 20.6    | 43.0    | 53.7    | 9.8     | 98.7    | 98.6   | 95.7     | 99.4    | 99.9      | 99.9    | 99.9    | 76.5     | 93.3    | 81.8   | 76.6   | 99.2   | 88.0 | 26.9 | 77.1 | 99.7    | 38.3    | 2.2     | 37.9    | 32.1     | 24.9     | 14.0     | 2.6      | 6.5      | 16.2     | 0.1      | 1.0      | 0.5     | 1.2     | 0.0      | 0.0      | 0.0     | 0.1     | 0.0     | 1.9      |      |
| 8  |       | 1.2     | 12.7    | 5.2     | 11.9    | 5.6     | 6.8     | 56.9    | 56.1   | 37.5     | 52.4    | 69.8      | 89.1    | 85.5    | 21.3     | 24.8    | 16.7   | 10.3   | 60.8   | 62.1 | 12.0 | 31.4 | 96.7    | 51.7    | 14.9    | 45.3    | 86.3     | 80.1     | 23.8     | 1.7      | 6.7      | 42.2     | 4.5      | 0.4      | 1.1     | 0.9     | 0.0      | 0.0      | 0.0     | 0.0     | 0.0     | 0.5      |      |
| 9  |       | 0.5     | 7.2     | 3.0     | 1.1     | 0.5     | 2.1     | 4.0     | 7.4    | 2.4      | 2.5     | 11.6      | 35.3    | 28.0    | 2.7      | 2.8     | 2.0    | 1.8    | 8.6    | 34.7 | 4.2  | 4.5  | 79.2    | 41.5    | 23.8    | 36.1    | 86.0     | 82.6     | 12.0     | 1.9      | 6.7      | 43.5     | 7.4      | 0.2      | 0.6     | 0.7     | 0.0      | 0.0      | 0.0     | 0.2     | 0.4     |          |      |
| 10 |       | 4.1     | 24.8    | 13.1    | 17.5    | 24.4    | 37.0    | 90.4    | 88.6   | 82.0     | 89.8    | 95.5      | 97.0    | 95.1    | 54.0     | 56.4    | 67.2   | 45.7   | 55.7   | 46.6 | 10.2 | 40.8 | 84.6    | 92.3    | 91.4    | 92.8    | 67.1     | 67.2     | 63.4     | 29.2     | 53.8     | 65.2     | 4.5      | 6.8      | 5.7     | 3.4     | 0.1      | 0.0      | 0.3     | 0.1     | 0.0     | 1.0      |      |
| 11 |       | 1.6     | 21.0    | 3.9     | 3.8     | 3.2     | 8.4     | 28.0    | 26.1   | 14.5     | 22.6    | 37.6      | 56.8    | 47.4    | 6.0      | 6.4     | 13.5   | 8.8    | 18.4   | 30.9 | 6.9  | 20.1 | 92.4    | 93.5    | 94.3    | 94.5    | 73.8     | 74.2     | 55.1     | 24.0     | 57.2     | 79.9     | 8.9      | 6.6      | 4.4     | 2.5     | 0.1      | 0.0      | 0.2     | 0.1     | 0.1     | 0.7      |      |
| 12 |       | 3.6     | 17.0    | 8.9     | 2.2     | 14.1    | 34.9    | 60.3    | 51.0   | 38.8     | 35.6    | 56.6      | 53.3    | 55.3    | 11.9     | 11.5    | 30.0   | 15.4   | 1.7    | 18.0 | 2.7  | 0.7  | 5.4     | 58.2    | 96.0    | 77.8    | 87.4     | 87.0     | 76.3     | 41.6     | 79.8     | 82.2     | 13.4     | 3.1      | 6.4     | 3.6     | 0.3      | 0.0      | 0.7     | 0.2     | 0.1     | 0.4      |      |
| 13 |       | 1.2     | 10.8    | 3.6     | 0.7     | 2.5     | 7.4     | 9.1     | 6.5    | 2.6      | 2.5     | 6.5       | 7.7     | 5.5     | 0.5      | 1.0     | 5.5    | 3.3    | 0.3    | 10.2 | 1.5  | 0.0  | 2.4     | 56.2    | 83.7    | 82.9    | 92.7     | 92.6     | 64.4     | 38.2     | 80.0     | 89.8     | 12.0     | 2.4      | 3.3     | 2.1     | 0.3      | 0.0      | 0.4     | 0.2     | 0.1     | 0.3      |      |
| 14 |       | 0.7     | 5.3     | 7.9     | 1.0     | 2.4     | 18.0    | 19.8    | 20.7   | 14.6     | 7.9     | 24.5      | 20.1    | 21.8    | 6.7      | 6.6     | 11.3   | 8.6    | 0.3    | 6.9  | 1.7  | 2.1  | 1.3     | 8.0     | 33.0    | 16.3    | 61.8     | 62.1     | 37.9     | 9.7      | 14.3     | 18.3     | 9.7      | 0.2      | 1.7     | 1.2     | 0.2      | 0.0      | 0.1     | 0.3     | 0.4     | 1.0      |      |
| 15 |       | 0.2     | 1.9     | 2.9     | 0.3     | 0.3     | 1.5     | 0.8     | 1.3    | 0.3      | 0.2     | 1.2       | 1.5     | 1.2     | 0.2      | 0.4     | 0.7    | 1.2    | 0.1    | 5.0  | 0.7  | 0.0  | 0.2     | 11.0    | 17.3    | 29.3    | 84.7     | 82.2     | 33.1     | 8.0      | 26.4     | 56.2     | 5.2      | 0.2      | 0.7     | 0.9     | 0.1      | 0.0      | 0.1     | 0.1     | 0.6     | 0.2      |      |
| 16 |       | 0.0     | 0.3     | 0.4     | 0.1     | 0.1     | 0.5     | 0.4     | 0.6    | 0.2      | 0.1     | 0.5       | 0.4     | 0.3     | 0.1      | 0.2     | 0.2    | 0.3    | 0.0    | 0.6  | 0.3  | 0.1  | 0.1     | 1.2     | 2.8     | 3.9     | 29.0     | 25.2     | 8.5      | 0.7      | 1.3      | 7.9      | 1.2      | 0.0      | 0.1     | 0.1     | 0.0      | 0.0      | 0.0     | 0.4     | 0.1     |          |      |
| 17 |       | 1.2     | 9.8     | 2.8     | 0.9     | 2.4     | 7.8     | 6.8     | 6.1    | 2.3      | 4.0     | 3.5       | 8.4     | 3.5     | 0.3      | 1.0     | 9.3    | 6.6    | 0.5    | 3.5  | 1.1  | 0.4  | 1.0     | 52.3    | 68.9    | 83.7    | 22.7     | 23.5     | 61.2     | 48.3     | 64.7     | 57.3     | 21.8     | 2.8      | 4.9     | 2.0     | 1.0      | 0.1      | 0.5     | 0.5     | 0.1     | 0.5      |      |
| 18 |       | 0.3     | 2.6     | 2.1     | 0.4     | 2.4     | 1.4     | 1.6     | 0.5    | 0.6      | 0.9     | 1.6       | 0.7     | 0.2     | 0.5      | 1.9     | 1.9    | 0.1    | 1.6    | 0.7  | 0.1  | 0.1  | 10.4    | 9.7     | 29.1    | 15.0    | 13.5     | 34.0     | 14.9     | 19.9     | 21.4     | 10.6     | 0.5      | 1.2      | 0.9     | 0.5     | 0.1      | 0.1      | 0.3     | 0.2     | 0.2     |          |      |
| 19 |       | 0.1     | 0.3     | 0.5     | 0.2     | 0.1     | 0.5     | 0.1     | 0.3    | 0.0      | 0.0     | 0.1       | 0.2     | 0.1     | 0.1      | 0.1     | 0.3    | 0.0    | 0.4    | 0.3  | 0.0  | 0.0  | 0.1     | 0.5     | 0.2     | 2.0     | 4.4      | 2.9      | 7.3      | 1.0      | 1.0      | 2.3      | 1.4      | 0.0      | 0.2     | 0.3     | 0.1      | 0.0      | 0.0     | 0.1     | 0.4     | 0.1      |      |
| 20 |       | 2.5     | 10.7    | 5.4     | 3.1     | 9.9     | 26.2    | 58.2    | 48.8   | 41.7     | 49.3    | 54.8      | 57.1    | 51.5    | 13.0     | 14.1    | 31.6   | 21.7   | 4.0    | 14.5 | 6.7  | 15.6 | 20.9    | 56.8    | 97.1    | 70.5    | 5.4      | 5.6      | 33.8     | 31.1     | 52.6     | 38.4     | 7.4      | 3.4      | 6.9     | 3.8     | 0.5      | 0.1      | 0.7     | 0.3     | 0.0     | 1.0      |      |
| 21 |       | 0.2     | 0.8     | 2.0     | 1.3     | 7.2     | 11.3    | 32.3    | 15.4   | 11.5     | 5.7     | 18.6      | 8.4     | 12.4    | 2.1      | 1.2     | 3.2    | 2.3    | 0.5    | 15.1 | 6.5  | 0.6  | 4.7     | 17.0    | 68.7    | 33.3    | 8.7      | 6.4      | 37.2     | 9.6      | 65.4     | 87.7     | 9.2      | 1.3      | 7.1     | 5.3     | 0.1      | 0.2      | 1.4     | 0.0     | 0.0     | 0.8      |      |
| 22 |       | 0.1     | 0.1     | 1.1     | 0.6     | 6.2     | 2.4     | 7.8     | 1.8    | 0.6      | 0.1     | 1.5       | 0.8     | 1.5     | 0.1      | 0.1     | 0.7    | 0.7    | 0.1    | 8.5  | 1.0  | 0.0  | 0.0     | 5.3     | 8.4     | 14.6    | 15.5     | 9.1      | 50.0     | 9.6      | 77.5     | 94.1     | 22.9     | 0.5      | 5.6     | 4.6     | 0.1      | 0.0      | 1.4     | 0.0     | 0.1     | 0.7      |      |
| 23 |       | 0.0     | 0.1     | 0.1     | 0.4     | 2.0     | 1.6     | 4.9     | 1.2    | 0.5      | 0.2     | 0.9       | 0.2     | 0.3     | 0.0      | 0.1     | 0.1    | 0.1    | 0.0    | 1.4  | 1.1  | 0.0  | 0.0     | 0.5     | 2.6     | 1.4     | 0.5      | 0.1      | 5.4      | 1.3      | 19.4     | 36.8     | 2.5      | 0.1      | 1.4     | 1.5     | 0.1      | 0.2      | 0.3     | 0.0     | 0.0     | 0.2      |      |
| 24 |       | 0.3     | 1.8     | 2.1     | 0.9     | 3.2     | 3.8     | 4.0     | 2.3    | 0.9      | 0.6     | 1.1       | 3.6     | 1.9     | 0.1      | 0.4     | 3.7    | 3.9    | 0.3    | 2.2  | 1.0  | 0.1  | 0.1     | 6.0     | 4.5     | 17.2    | 1.3      | 0.2      | 15.6     | 29.8     | 29.3     | 7.1      | 49.5     | 1.3      | 4.7     | 2.2     | 1.0      | 0.0      | 0.6     | 0.3     | 0.1     | 0.3      |      |
| 25 |       | 0.1     | 0.3     | 0.8     | 0.5     | 0.5     | 0.6     | 0.3     | 0.3    | 0.1      | 0.0     | 0.1       | 0.5     | 0.3     | 0.1      | 0.1     | 0.4    | 0.7    | 0.1    | 0.8  | 0.4  | 0.0  | 0.1     | 0.4     | 0.1     | 1.4     | 0.8      | 0.1      | 2.0      | 8.8      | 2.8      | 0.4      | 60.1     | 0.4      | 1.1     | 0.9     | 0.6      | 0.1      | 0.2     | 0.3     | 1.7     | 0.3      |      |
| 26 |       | 0.1     | 0.2     | 0.6     | 0.2     | 0.2     | 0.2     | 0.1     | 0.2    | 0.0      | 0.0     | 0.1       | 0.3     | 0.2     | 0.0      | 0.1     | 0.2    | 0.4    | 0.0    | 0.6  | 0.3  | 0.0  | 0.0     | 0.3     | 0.1     | 0.8     | 0.2      | 0.0      | 0.8      | 2.3      | 0.9      | 0.2      | 4.2      | 0.1      | 0.2     | 0.4     | 0.1      | 0.0      | 0.0     | 0.1     | 0.1     | 0.0      |      |
| 27 |       | 0.0     | 0.5     | 4.4     | 0.4     | 1.3     | 1.2     | 1.3     | 0.7    | 0.3      | 0.1     | 0.7       | 2.1     | 2.4     | 0.1      | 0.1     | 1.6    | 2.7    | 0.1    | 21.7 | 1.4  | 0.0  | 0.0     | 1.1     | 1.1     | 3.5     | 4.6      | 1.2      | 9.9      | 3.0      | 7.1      | 31.7     | 34.0     | 0.2      | 0.7     | 1.1     | 0.0      | 0.0      | 0.1     | 0.0     | 0.3     | 0.1      |      |
| 28 |       | 0.0     | 0.0     | 0.2     | 0.3     | 0.0     | 0.4     | 0.1     | 0.2    | 0.2      | 0.0     | 0.3       | 0.1     | 0.1     | 0.1      | 0.0     | 0.1    | 0.1    | 0.1    | 0.0  | 1.3  | 0.3  | 0.0     | 3.3     | 0.2     | 0.5     | 0.5      | 13.8     | 3.4      | 5.7      | 1.3      | 3.0      | 1.5      | 68.8     | 0.1     | 2.7     | 2.7      | 0.3      | 0.2     | 0.8     | 0.4     | 43.0     | 74.9 |
| 29 |       | 4.6     | 8.4     | 11.1    | 6.6     | 20.4    | 54.7    | 88.5    | 88.1   | 89.6     | 86.6    | 95.3      | 86.3    | 86.9    | 68.1     | 60.2    | 67.6   | 42.6   | 10.4   | 13.6 | 3.8  | 24.2 | 7.6     | 24.7    | 84.4    | 25.8    | 4.9      | 5.6      | 14.9     | 17.6     | 21.7     | 5.0      | 2.9      | 0.9      | 4.8     | 3.1     | 0.4      | 0.1      | 0.4     | 0.8     | 0.2     | 4.4      |      |
| 30 |       | 1.2     | 3.6     | 8.4     | 2.4     | 2.6     | 13.5    | 24.9    | 34.5   | 34.4     | 24.6    | 52.1      | 60.1    | 64.6    | 27.4     | 23.8    | 20.7   | 16.7   | 3.2    | 9.1  | 2.9  | 12.0 | 6.9     | 8.8     | 35.8    | 6.5     | 2.8      | 2.9      | 4.4      | 3.7      | 3.0      | 1.0      | 2.8      | 0.1      | 0.9     | 1.0     | 0.0      | 0.1      | 0.1     | 0.4     | 0.6     | 3.4      |      |
| 31 |       | 1.7     | 7.6     | 4.7     | 1.7     | 2.4     | 6.8     | 17.7    | 18.4   | 21.5     | 37.9    | 31.6      | 35.4    | 20.1    | 9.3      | 13.0    | 48.3   | 57.7   | 3.3    | 1.2  | 5.9  | 69.0 | 10.5    | 16.1    | 41.8    | 11.0    | 0.6      | 0.5      | 1.2      | 10.7     | 2.2      | 0.0      | 1.1      | 1.4      | 2.0     | 1.3     | 1.1      | 0.5      | 0.2     | 0.8     | 0.2     | 1.1      |      |
| 32 |       | 1.4     | 1.6     | 1.0     | 1.9     | 8.1     | 50.1    | 72.4    | 57.2   | 60.9     | 42.5    | 57.6      | 12.1    | 14.8    | 23.6     | 19.5    | 16.0   | 5.4    | 0.3    | 1.6  | 1.7  | 3.6  | 0.1     | 2.1     | 41.4    | 5.0     | 1.8      | 1.7      | 12.2     | 10.9     | 17.1     | 4.1      | 4.1      | 0.9      | 6.5     | 3.0     | 1.3      | 0.3      | 0.6     | 0.5     | 0.3     | 3.8      |      |
| 33 |       | 1.2     | 4.6     | 0.9     | 0.9     | 1.2     | 9.8     | 12.9    | 10.3   | 7.0      | 12.7    | 10.5      | 9.8     | 5.7     | 1.3      | 2.1     | 6.3    | 4.1    | 0.4    | 2.6  | 4.3  | 8.6  | 1.5     | 16.3    | 77.1    | 23.5    | 0.7      | 0.5      | 5.1      | 10.3     | 10.8     | 3.9      | 1.8      | 1.1      | 2.9     | 1.6     | 0.7      | 0.3      | 0.2     | 0.4     | 0.1     | 0.4      |      |
| 34 |       | 0.2     | 0.7     | 2.0     | 0.5     | 0.7     | 5.4     | 7.2     | 6.2    | 4.9      | 1.2     | 8.9       | 5.7     | 6.2     | 2.9      | 2.2     | 2.3    | 2.3    | 0.1    | 1.5  | 0.9  | 1.0  | 0.2     | 0.6     | 6.3     | 1.0     | 1        |          |          |          |          |          |          |          |         |         |          |          |         |         |         |          |      |

| State | Most frequent chromatin marks |     |           |     |           |     |           |     |           |     |
|-------|-------------------------------|-----|-----------|-----|-----------|-----|-----------|-----|-----------|-----|
|       | 1st                           | %   | 2nd       | %   | 3rd       | %   | 4th       | %   | 5th       |     |
| 1     | H3K27ac                       | 100 | H2BK120ac | 100 | H3K18ac   | 99  | H2BK5ac   | 99  | H4K91ac   | 95  |
| 2     | H2AZ                          | 91  | H3K4me2   | 90  | H3K4me3   | 87  | H3K27ac   | 86  | H3K9me1   | 78  |
| 3     | H3K4me3                       | 94  | H3K4me2   | 80  | H2AZ      | 77  | H3K9me1   | 74  | H3K4me1   | 46  |
| 4     | H3K4me3                       | 78  | H3K9me1   | 26  | H3K4me1   | 21  | H3K4me2   | 21  | H2AZ      | 19  |
| 5     | H3K4me3                       | 87  | PolII     | 53  | H3K27ac   | 27  | H4K91ac   | 27  | H2BK5ac   | 24  |
| 6     | H3K4me3                       | 98  | H3K27ac   | 89  | H2BK5ac   | 87  | H2BK120ac | 84  | H3K18ac   | 76  |
| 7     | H3K27ac                       | 100 | H2BK5ac   | 100 | H2BK120ac | 100 | H3K4me3   | 100 | H3K18ac   | 99  |
| 8     | H3K4me3                       | 97  | H3K27ac   | 89  | H3K79me3  | 86  | H2BK5ac   | 86  | H3K79me2  | 80  |
| 9     | H3K79me3                      | 86  | H3K79me2  | 83  | H3K4me3   | 79  | H4K20me1  | 43  | H3K4me2   | 41  |
| 10    | H3K27ac                       | 97  | H2BK120ac | 95  | H2BK5ac   | 95  | H3K9me1   | 93  | H3K4me2   | 93  |
| 11    | H3K9me1                       | 95  | H3K4me1   | 94  | H3K4me2   | 94  | H3K4me3   | 92  | H4K20me1  | 80  |
| 12    | H3K4me1                       | 96  | H3K79me3  | 87  | H3K79me2  | 87  | H4K20me1  | 82  | H2BK5me1  | 80  |
| 13    | H3K79me3                      | 93  | H3K79me2  | 93  | H4K20me1  | 90  | H3K4me1   | 84  | H3K9me1   | 83  |
| 14    | H3K79me2                      | 62  | H3K79me3  | 62  | H3K79me1  | 38  | H3K4me1   | 33  | H2BK120ac | 25  |
| 15    | H3K79me3                      | 85  | H3K79me2  | 82  | H4K20me1  | 56  | H3K79me1  | 33  | H3K9me1   | 29  |
| 16    | H3K79me3                      | 29  | H3K79me2  | 25  | H3K79me1  | 8   | H4K20me1  | 8   | H3K9me1   | 4   |
| 17    | H3K9me1                       | 84  | H3K4me1   | 69  | H2BK5me1  | 65  | H3K79me1  | 61  | H4K20me1  | 57  |
| 18    | H3K79me1                      | 34  | H3K9me1   | 29  | H4K20me1  | 21  | H2BK5me1  | 20  | H3K79me3  | 15  |
| 19    | H3K79me1                      | 7   | H3K79me3  | 4   | H3K79me2  | 3   | H4K20me1  | 2   | H3K9me1   | 2   |
| 20    | H3K4me1                       | 97  | H3K9me1   | 71  | H4K91ac   | 58  | H3K27ac   | 57  | H3K4me2   | 57  |
| 21    | H4K20me1                      | 88  | H3K4me1   | 69  | H2BK5me1  | 65  | H3K79me1  | 37  | H3K9me1   | 33  |
| 22    | H4K20me1                      | 94  | H2BK5me1  | 77  | H3K79me1  | 50  | H3K36me3  | 23  | H3K79me3  | 16  |
| 23    | H4K20me1                      | 37  | H2BK5me1  | 19  | H3K79me1  | 5   | H4K91ac   | 5   | H3K4me1   | 3   |
| 24    | H3K36me3                      | 50  | H3K27me1  | 30  | H2BK5me1  | 29  | H3K9me1   | 17  | H3K79me1  | 16  |
| 25    | H3K36me3                      | 60  | H3K27me1  | 9   | H2BK5me1  | 3   | H3K79me1  | 2   | H3K9me3   | 1   |
| 26    | H3K36me3                      | 4   | H3K27me1  | 2   | H2BK5me1  | 1   | H3K9me1   | 1   | H3K79me1  | 1   |
| 27    | H3K36me3                      | 34  | H4K20me1  | 32  | PolII     | 22  | H3K79me1  | 10  | H2BK5me1  | 7   |
| 28    | H4K20me3                      | 75  | H3K36me3  | 69  | H3K9me3   | 43  | H3K79me3  | 14  | H3K79me1  | 6   |
| 29    | H2BK120ac                     | 95  | H2BK20ac  | 90  | H4K91ac   | 88  | H3K4ac    | 88  | H2BK5ac   | 87  |
| 30    | H2BK5ac                       | 65  | H3K27ac   | 60  | H2BK120ac | 52  | H3K4me1   | 36  | H3K4ac    | 34  |
| 31    | H2AZ                          | 69  | H4K8ac    | 58  | H4K5ac    | 48  | H3K4me1   | 42  | H3K18ac   | 38  |
| 32    | H4K91ac                       | 72  | H2BK20ac  | 61  | H2BK120ac | 58  | H3K4ac    | 57  | H2AK5ac   | 50  |
| 33    | H3K4me1                       | 77  | H3K9me1   | 23  | H3K4me2   | 16  | H4K91ac   | 13  | H3K18ac   | 13  |
| 34    | H2BK120ac                     | 9   | H4K91ac   | 7   | H3K4me1   | 6   | H3K4ac    | 6   | H2BK5ac   | 6   |
| 35    | H2AK5ac                       | 32  | H4K91ac   | 30  | H3K4ac    | 20  | H2BK20ac  | 20  | H3K18ac   | 16  |
| 36    | H2AK5ac                       | 6   | H4K91ac   | 3   | H3K4ac    | 2   | H3K18ac   | 2   | H3R2me1   | 1   |
| 37    | H2AK5ac                       | 0.7 | H3R2me1   | 0.5 | H3R2me2   | 0.4 | H3K36me3  | 0.3 | H3K27me2  | 0.2 |
| 38    | H2AZ                          | 33  | H4K8ac    | 9   | H3K4me1   | 6   | H4K5ac    | 5   | H3K18ac   | 4   |
| 39    | CTCF                          | 86  | H2AZ      | 12  | H3K4me1   | 5   | PolII     | 4   | H3R2me1   | 3   |
| 40    | all emissions < 0.0010        |     |           |     |           |     |           |     |           |     |
| 41    | H3K9me3                       | 2   | H3K9me2   | 1   | H3R2me2   | 0.5 | H4K20me3  | 0.4 | H3K27me2  | 0.3 |
| 42    | H3K27me2                      | 9   | H3K9me2   | 6   | H4K20me3  | 4   | H3K9me3   | 2   | H3R2me2   | 2   |
| 43    | H3K27me3                      | 1   | H3K9me2   | 0.5 | H3K9me3   | 0.4 | H3K27me2  | 0.3 | H3R2me2   | 0.3 |
| 44    | H3K27me3                      | 10  | H3K27me2  | 9   | H3R2me1   | 6   | H3K36me1  | 3   | H3R2me2   | 3   |
| 45    | H3K27me3                      | 16  | H3K9me3   | 1   | H3R2me1   | 1   | H3R2me2   | 1   | H3K23ac   | 1   |
| 46    | H2BK5me1                      | 64  | H3R2me1   | 49  | H3K4me1   | 28  | H3R2me2   | 25  | H3K36me1  | 18  |
| 47    | H3K9me3                       | 32  | H3K27me3  | 3   | H3K36me3  | 2   | H4K20me3  | 2   | H3K9me2   | 1   |
| 48    | H4K20me3                      | 38  | H3K9me3   | 12  | H3K36me3  | 1   | H3R2me2   | 1   | H3K9me2   | 1   |
| 49    | H4K20me3                      | 85  | H3K9me3   | 49  | H4R3me2   | 49  | H3R2me2   | 38  | H3K9me2   | 25  |
| 50    | H4K20me3                      | 97  | H4R3me2   | 88  | H3R2me2   | 85  | H3K36me3  | 80  | H3K9me3   | 80  |
| 51    | H4K20me3                      | 100 | H3R2me2   | 99  | H3R2me1   | 98  | H4R3me2   | 97  | H3K36me1  | 97  |

**Supplementary Figure 3: Top five most-frequently-detected chromatin marks for each state.** Number in each cell indicates the frequency of the mark in that state (multiplied by 100 to improve readability). Marks are colored according to their similarity in chromatin state enrichments in order to visually reveal groups of states defined by similar mark combinations, and also differences between states within each group.

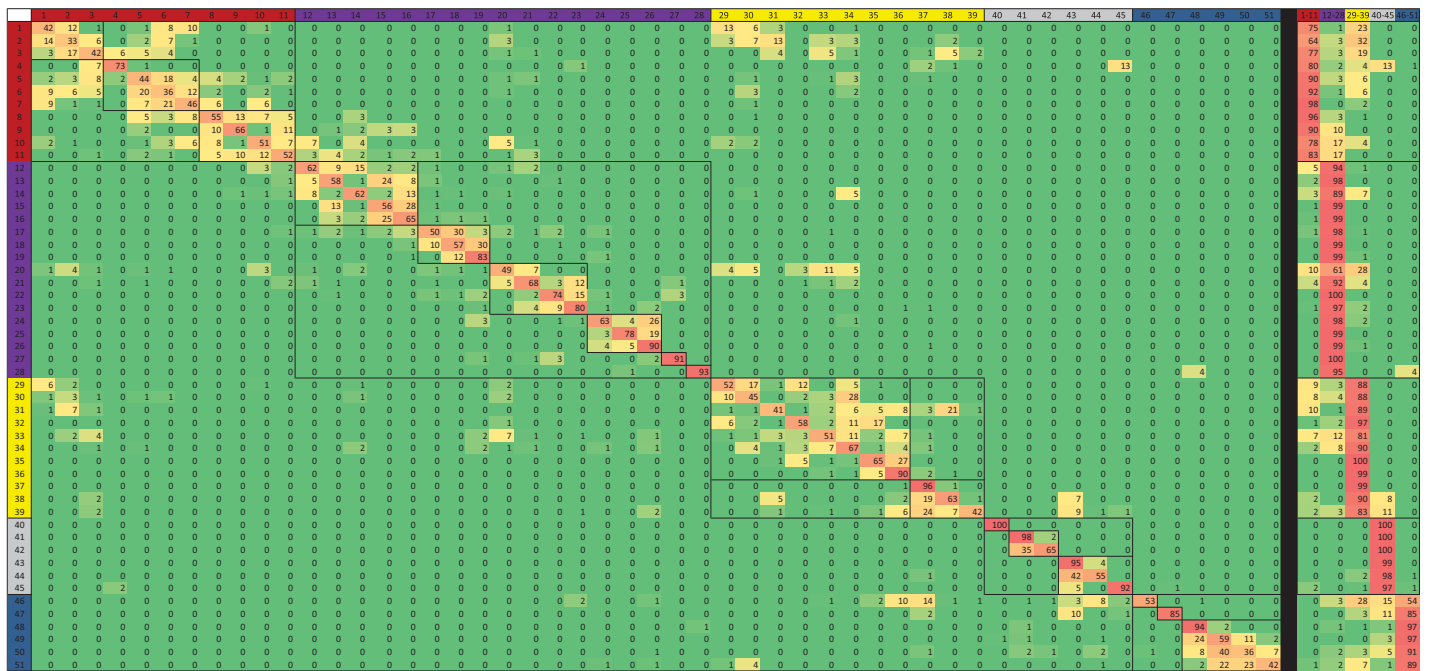

**Supplementary Figure 4: State-to-state and state-to-group transition probabilities (Transition Matrix).** To the left of the thick black line is the full set of transition probabilities between states multiplied by 100. The rows are the state the transition is from and the column the state the transitioning is to. The boxes show the groups and sub-groups of states described in the text. To the right of the thick black line is the total probability of transitioning from a state to any state in the indicated group of states (these are not separate model parameters, but rather a summarization of the table by summing the transition probabilities to each group of states).

| States Transitioning To |                                                       |    |    |    |    |    |    |    |    |    |    | Transition Probability |                 |     |     |     |     |     |     |     |     |     |      |      |       |
|-------------------------|-------------------------------------------------------|----|----|----|----|----|----|----|----|----|----|------------------------|-----------------|-----|-----|-----|-----|-----|-----|-----|-----|-----|------|------|-------|
| State                   | Non-self transitions $\geq 0.015$ in decreasing order |    |    |    |    |    |    |    |    |    |    | State                  | Self-Transition | 1st | 2nd | 3rd | 4th | 5th | 6th | 7th | 8th | 9th | 10th | 11th | Other |
| 1                       | 29                                                    | 2  | 7  | 6  | 30 | 31 |    |    |    |    |    | 1                      | 42              | 13  | 12  | 10  | 8   | 6   | 3   |     |     |     |      |      | 6     |
| 2                       | 1                                                     | 31 | 6  | 30 | 3  | 29 | 33 | 34 | 20 | 5  | 38 | 2                      | 33              | 14  | 13  | 7   | 7   | 6   | 3   | 3   | 3   | 3   | 2    | 2    | 4     |
| 3                       | 2                                                     | 4  | 38 | 5  | 33 | 6  | 31 | 1  | 39 |    |    | 3                      | 42              | 17  | 6   | 5   | 5   | 5   | 4   | 4   | 3   | 2   |      |      | 8     |
| 4                       | 45                                                    | 3  | 37 |    |    |    |    |    |    |    |    | 4                      | 73              | 13  | 7   | 2   |     |     |     |     |     |     |      |      | 6     |
| 5                       | 6                                                     | 3  | 7  | 8  | 2  | 34 | 9  | 1  | 4  | 11 |    | 5                      | 44              | 18  | 8   | 4   | 4   | 3   | 3   | 2   | 2   | 2   | 2    |      | 8     |
| 6                       | 5                                                     | 7  | 1  | 2  | 3  | 30 | 8  | 10 | 34 |    |    | 6                      | 36              | 20  | 12  | 9   | 6   | 5   | 3   | 2   | 2   | 2   |      |      | 4     |
| 7                       | 6                                                     | 1  | 5  | 8  | 10 |    |    |    |    |    |    | 7                      | 46              | 21  | 9   | 7   | 6   | 6   |     |     |     |     |      |      | 4     |
| 8                       | 9                                                     | 7  | 10 | 5  | 11 | 6  | 14 |    |    |    |    | 8                      | 55              | 13  | 8   | 7   | 5   | 5   | 3   | 3   |     |     |      |      | 1     |
| 9                       | 11                                                    | 8  | 16 | 15 | 5  | 14 |    |    |    |    |    | 9                      | 66              | 11  | 10  | 3   | 3   | 2   | 2   |     |     |     |      |      | 3     |
| 10                      | 8                                                     | 12 | 11 | 7  | 20 | 14 | 6  | 29 | 1  | 30 |    | 10                     | 51              | 8   | 7   | 7   | 6   | 5   | 4   | 3   | 2   | 2   | 2    |      | 4     |
| 11                      | 10                                                    | 9  | 8  | 13 | 12 | 21 | 14 | 5  | 16 |    |    | 11                     | 52              | 12  | 10  | 5   | 4   | 3   | 3   | 2   | 2   | 2   |      |      | 6     |
| 12                      | 14                                                    | 13 | 10 | 21 | 16 | 15 | 11 |    |    |    |    | 12                     | 62              | 15  | 9   | 3   | 2   | 2   | 2   | 2   |     |     |      |      | 3     |
| 13                      | 15                                                    | 16 | 12 |    |    |    |    |    |    |    |    | 13                     | 58              | 24  | 8   | 5   |     |     |     |     |     |     |      |      | 5     |
| 14                      | 16                                                    | 12 | 34 | 15 | 13 |    |    |    |    |    |    | 14                     | 62              | 13  | 8   | 5   | 2   | 2   |     |     |     |     |      |      | 8     |
| 15                      | 16                                                    | 13 |    |    |    |    |    |    |    |    |    | 15                     | 56              | 28  | 13  |     |     |     |     |     |     |     |      |      | 3     |
| 16                      | 15                                                    | 13 | 14 |    |    |    |    |    |    |    |    | 16                     | 65              | 25  | 3   | 2   |     |     |     |     |     |     |      |      | 4     |
| 17                      | 18                                                    | 16 | 19 | 13 | 20 | 22 | 15 |    |    |    |    | 17                     | 50              | 30  | 3   | 3   | 2   | 2   | 2   | 2   |     |     |      |      | 6     |
| 18                      | 19                                                    | 17 |    |    |    |    |    |    |    |    |    | 18                     | 57              | 30  | 10  |     |     |     |     |     |     |     |      |      | 3     |
| 19                      | 18                                                    |    |    |    |    |    |    |    |    |    |    | 19                     | 83              | 12  |     |     |     |     |     |     |     |     |      |      | 5     |
| 20                      | 33                                                    | 21 | 30 | 34 | 29 | 2  | 10 | 32 | 14 |    |    | 20                     | 49              | 11  | 7   | 5   | 5   | 4   | 4   | 3   | 3   | 2   |      |      | 9     |
| 21                      | 23                                                    | 20 | 22 | 34 | 11 |    |    |    |    |    |    | 21                     | 68              | 12  | 5   | 3   | 2   | 2   |     |     |     |     |      |      | 8     |
| 22                      | 23                                                    | 27 | 19 | 21 |    |    |    |    |    |    |    | 22                     | 74              | 15  | 3   | 2   | 2   |     |     |     |     |     |      |      | 4     |
| 23                      | 22                                                    | 21 | 26 |    |    |    |    |    |    |    |    | 23                     | 80              | 9   | 4   | 2   |     |     |     |     |     |     |      |      | 5     |
| 24                      | 26                                                    | 25 | 19 |    |    |    |    |    |    |    |    | 24                     | 63              | 26  | 4   | 3   |     |     |     |     |     |     |      |      | 4     |
| 25                      | 26                                                    | 24 |    |    |    |    |    |    |    |    |    | 25                     | 78              | 19  | 3   |     |     |     |     |     |     |     |      |      | 1     |
| 26                      | 25                                                    | 24 |    |    |    |    |    |    |    |    |    | 26                     | 90              | 5   | 4   |     |     |     |     |     |     |     |      |      | 1     |
| 27                      | 22                                                    | 26 |    |    |    |    |    |    |    |    |    | 27                     | 91              | 3   | 2   |     |     |     |     |     |     |     |      |      | 4     |
| 28                      | 48                                                    |    |    |    |    |    |    |    |    |    |    | 28                     | 93              | 4   |     |     |     |     |     |     |     |     |      |      | 3     |
| 29                      | 30                                                    | 32 | 1  | 34 | 2  | 20 |    |    |    |    |    | 29                     | 52              | 17  | 12  | 6   | 5   | 2   | 2   |     |     |     |      |      | 5     |
| 30                      | 34                                                    | 29 | 2  | 33 | 20 | 32 |    |    |    |    |    | 30                     | 45              | 28  | 10  | 3   | 3   | 2   | 2   |     |     |     |      |      | 8     |
| 31                      | 38                                                    | 36 | 2  | 34 | 35 | 37 | 33 |    |    |    |    | 31                     | 41              | 21  | 8   | 7   | 6   | 5   | 3   | 2   |     |     |      |      | 7     |
| 32                      | 35                                                    | 34 | 29 | 33 | 30 |    |    |    |    |    |    | 32                     | 58              | 17  | 11  | 6   | 2   | 2   |     |     |     |     |      |      | 4     |
| 33                      | 34                                                    | 36 | 20 | 3  | 31 | 32 | 2  | 35 | 19 |    |    | 33                     | 51              | 11  | 7   | 7   | 4   | 3   | 3   | 2   | 2   | 2   |      |      | 8     |
| 34                      | 33                                                    | 30 | 36 | 32 | 14 | 19 |    |    |    |    |    | 34                     | 67              | 7   | 4   | 4   | 3   | 2   | 2   |     |     |     |      |      | 11    |
| 35                      | 36                                                    | 32 |    |    |    |    |    |    |    |    |    | 35                     | 65              | 27  | 5   |     |     |     |     |     |     |     |      |      | 3     |
| 36                      | 35                                                    | 37 |    |    |    |    |    |    |    |    |    | 36                     | 90              | 5   | 2   |     |     |     |     |     |     |     |      |      | 3     |
| 37                      |                                                       |    |    |    |    |    |    |    |    |    |    | 37                     | 96              |     |     |     |     |     |     |     |     |     |      |      | 4     |
| 38                      | 37                                                    | 43 | 31 | 3  | 36 |    |    |    |    |    |    | 38                     | 63              | 19  | 7   | 5   | 2   | 2   |     |     |     |     |      |      | 2     |
| 39                      | 37                                                    | 43 | 38 | 36 | 26 | 3  |    |    |    |    |    | 39                     | 42              | 24  | 9   | 7   | 6   | 2   | 2   |     |     |     |      |      | 8     |
| 40                      |                                                       |    |    |    |    |    |    |    |    |    |    | 40                     | 100             |     |     |     |     |     |     |     |     |     |      |      | 0     |
| 41                      | 42                                                    |    |    |    |    |    |    |    |    |    |    | 41                     | 98              | 2   |     |     |     |     |     |     |     |     |      |      | 0     |
| 42                      | 41                                                    |    |    |    |    |    |    |    |    |    |    | 42                     | 65              | 35  |     |     |     |     |     |     |     |     |      |      | 0     |
| 43                      | 44                                                    |    |    |    |    |    |    |    |    |    |    | 43                     | 95              | 4   |     |     |     |     |     |     |     |     |      |      | 1     |
| 44                      | 43                                                    |    |    |    |    |    |    |    |    |    |    | 44                     | 55              | 42  |     |     |     |     |     |     |     |     |      |      | 3     |
| 45                      | 43                                                    | 4  |    |    |    |    |    |    |    |    |    | 45                     | 92              | 5   | 2   |     |     |     |     |     |     |     |      |      | 2     |
| 46                      | 37                                                    | 36 | 44 | 43 | 23 | 35 | 45 |    |    |    |    | 46                     | 53              | 14  | 10  | 8   | 3   | 2   | 2   | 2   |     |     |      |      | 7     |
| 47                      | 43                                                    | 37 |    |    |    |    |    |    |    |    |    | 47                     | 85              | 10  | 2   |     |     |     |     |     |     |     |      |      | 3     |
| 48                      | 49                                                    |    |    |    |    |    |    |    |    |    |    | 48                     | 94              | 2   |     |     |     |     |     |     |     |     |      |      | 4     |
| 49                      | 48                                                    | 50 | 51 |    |    |    |    |    |    |    |    | 49                     | 59              | 24  | 11  | 2   |     |     |     |     |     |     |      |      | 4     |
| 50                      | 49                                                    | 48 | 51 | 44 | 41 |    |    |    |    |    |    | 50                     | 36              | 40  | 8   | 7   | 2   | 2   |     |     |     |     |      |      | 6     |
| 51                      | 50                                                    | 49 | 30 | 48 |    |    |    |    |    |    |    | 51                     | 42              | 23  | 22  | 4   | 2   |     |     |     |     |     |      |      | 7     |

**Supplementary Figure 5: High-probability transitions for each state.** Left: For each state all non self-transitions that are greater than 0.015 are indicated in decreasing order. Right: Corresponding table of probabilities for self-transition (first column), and non-self transition probabilities for each transition indicated in the left table. Right-most column shows remaining transition probability for all other states (probability  $< 0.015$ ).

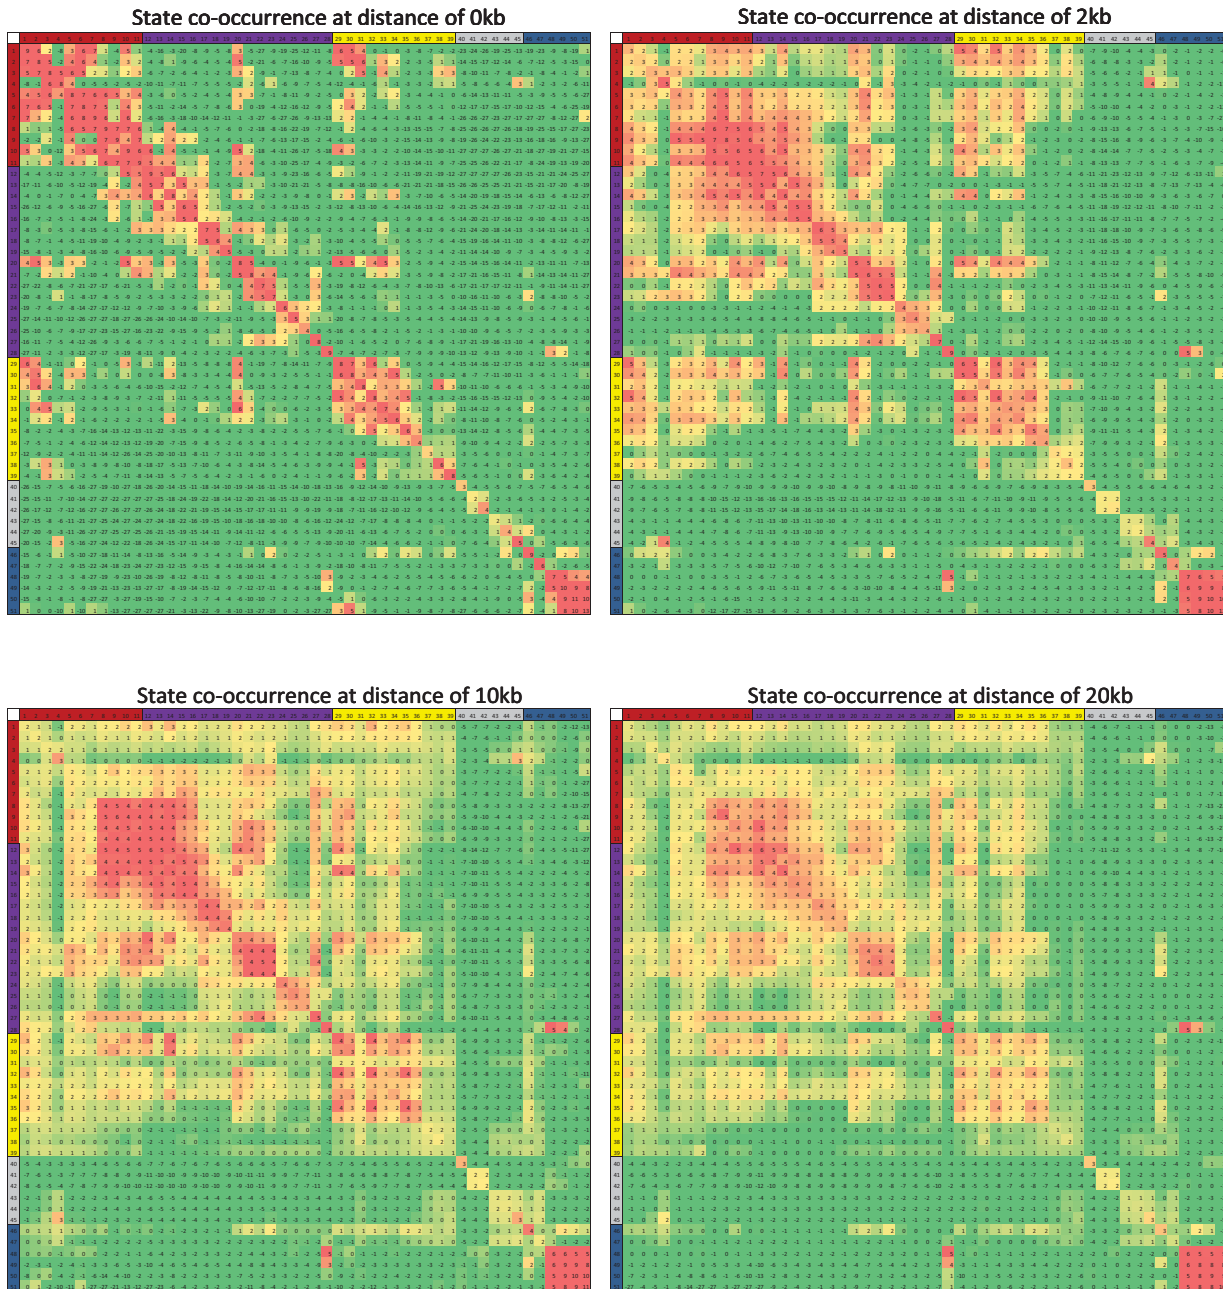

**Supplementary Figure 6: Chromatin state co-occurrence enrichments at distances of 0kb, 2kb, 10kb, and 20kb.** The grid shows the log base 2 fold enrichment for the frequency with which each pair of states co-occur at a fixed distance based on genomic coordinates relative to how often they would be expected to co-occur at the distance based on their size and if state occurrences were independent. Four distances are shown at a fixed gap of 0bp (top left) 2kb (top right), 10kb (bottom left), and 20kb (bottom right). These tables show several noteworthy longer-distance spatial relationships between states. For instance, large scale repressed states are depleted at each of the shown distances from most of the promoter, transcribed, and active intergenic states. Also, transcribed states enrich at all the distances shown relative to all promoter states except for the repressed promoter state (state 4). In computing the log fold enrichments, a pseudocount of  $10^{-8}$  was added to the ratio before taking the log to smooth values close to 0.

| state                          | ChromaSig clusters |       |      |      |      |      |      |      |      |      |      |      |       |      |     |      | Total coverage of each state (over all clusters) |
|--------------------------------|--------------------|-------|------|------|------|------|------|------|------|------|------|------|-------|------|-----|------|--------------------------------------------------|
|                                | C7                 | C8    | C1   | C4   | C2   | C3   | C11  | C12  | C13  | C5   | C10  | C6   | C9    | C16  | C14 | C15  |                                                  |
| 1                              | 53.6               | 3.7   | 41.6 | 1.2  | 0.0  | 0.0  | 0.0  | 0.0  | 0.0  | 14.8 | 33.1 | 1.6  | 0.3   | 0.0  | 0.0 | 0.0  | 74.5                                             |
| 2                              | 53.7               | 12.0  | 27.7 | 1.0  | 0.0  | 0.0  | 0.0  | 0.0  | 0.0  | 35.2 | 34.3 | 7.7  | 0.5   | 0.1  | 0.0 | 0.0  | 69.0                                             |
| 3                              | 43.8               | 47.3  | 24.6 | 0.6  | 0.4  | 0.1  | 0.0  | 0.0  | 0.0  | 29.0 | 7.2  | 6.2  | 2.7   | 0.2  | 0.1 | 0.0  | 58.7                                             |
| 4                              | 8.8                | 113.8 | 3.2  | 0.1  | 0.7  | 0.0  | 0.0  | 0.0  | 0.0  | 6.6  | 0.3  | 1.4  | 10.7  | 17.8 | 1.2 | 0.0  | 34.7                                             |
| 5                              | 28.5               | 7.0   | 46.3 | 1.9  | 1.2  | 0.1  | 0.0  | 0.0  | 0.0  | 18.9 | 2.2  | 0.4  | 1.3   | 0.0  | 0.0 | 0.0  | 56.7                                             |
| 6                              | 38.6               | 4.0   | 58.3 | 0.8  | 0.4  | 0.1  | 0.0  | 0.0  | 0.0  | 21.2 | 2.5  | 0.4  | 0.2   | 0.0  | 0.0 | 0.0  | 70.7                                             |
| 7                              | 29.4               | 0.5   | 77.1 | 0.3  | 0.0  | 0.0  | 0.0  | 0.0  | 0.0  | 14.7 | 0.6  | 0.1  | 0.1   | 0.0  | 0.0 | 0.0  | 77.6                                             |
| 8                              | 8.7                | 0.0   | 48.8 | 2.4  | 0.0  | 0.1  | 0.0  | 0.0  | 0.0  | 5.7  | 1.5  | 0.0  | 0.0   | 0.0  | 0.0 | 0.0  | 44.3                                             |
| 9                              | 7.7                | 0.0   | 28.6 | 6.0  | 0.4  | 0.6  | 0.0  | 0.0  | 0.0  | 5.3  | 1.2  | 0.1  | 0.0   | 0.0  | 0.0 | 0.0  | 30.2                                             |
| 10                             | 4.6                | 0.0   | 55.9 | 22.1 | 0.2  | 0.2  | 0.0  | 0.0  | 0.0  | 0.6  | 9.8  | 0.0  | 0.0   | 0.0  | 0.0 | 0.0  | 58.9                                             |
| 11                             | 2.9                | 0.0   | 53.9 | 18.6 | 0.7  | 0.4  | 0.0  | 0.0  | 0.0  | 0.4  | 2.2  | 0.0  | 0.2   | 0.0  | 0.0 | 0.0  | 52.7                                             |
| 12                             | 0.6                | 0.0   | 9.5  | 65.3 | 2.6  | 3.3  | 0.2  | 0.0  | 0.0  | 0.0  | 5.2  | 0.0  | 0.5   | 0.0  | 0.0 | 0.0  | 42.7                                             |
| 13                             | 0.1                | 0.0   | 7.7  | 58.2 | 13.9 | 4.2  | 0.0  | 0.0  | 0.0  | 0.0  | 0.4  | 0.0  | 0.2   | 0.0  | 0.0 | 0.0  | 37.3                                             |
| 14                             | 3.9                | 0.0   | 8.4  | 14.9 | 1.5  | 4.0  | 1.7  | 0.1  | 0.3  | 0.8  | 9.7  | 0.4  | 1.7   | 0.0  | 0.1 | 0.0  | 20.9                                             |
| 15                             | 0.5                | 0.0   | 4.6  | 19.8 | 9.7  | 4.5  | 0.3  | 0.0  | 0.0  | 0.1  | 0.5  | 0.0  | 0.2   | 0.0  | 0.0 | 0.0  | 15.7                                             |
| 16                             | 1.2                | 0.0   | 3.6  | 8.1  | 3.7  | 2.6  | 0.4  | 0.1  | 0.2  | 0.5  | 1.0  | 0.2  | 0.6   | 0.0  | 0.0 | 0.0  | 9.1                                              |
| 17                             | 0.6                | 0.0   | 7.9  | 42.0 | 5.5  | 22.1 | 2.3  | 0.0  | 0.0  | 0.0  | 1.9  | 0.0  | 1.4   | 0.0  | 0.0 | 0.0  | 34.0                                             |
| 18                             | 0.7                | 0.0   | 2.4  | 8.1  | 2.1  | 11.9 | 2.4  | 0.1  | 0.0  | 0.1  | 0.8  | 0.0  | 2.1   | 0.0  | 0.0 | 0.0  | 10.5                                             |
| 19                             | 1.1                | 0.1   | 1.0  | 1.1  | 1.1  | 3.1  | 1.6  | 0.4  | 0.1  | 0.3  | 0.4  | 0.0  | 1.8   | 0.0  | 0.0 | 0.0  | 3.9                                              |
| 20                             | 6.9                | 0.3   | 20.2 | 27.6 | 3.7  | 4.1  | 0.7  | 0.1  | 0.0  | 0.3  | 45.7 | 0.1  | 6.2   | 0.0  | 0.0 | 0.0  | 47.2                                             |
| 21                             | 1.3                | 0.2   | 22.1 | 21.6 | 41.7 | 17.7 | 0.5  | 0.0  | 0.0  | 0.0  | 2.6  | 0.0  | 14.2  | 0.0  | 0.0 | 0.0  | 37.6                                             |
| 22                             | 0.1                | 0.0   | 2.4  | 8.9  | 96.9 | 62.3 | 3.0  | 0.0  | 0.0  | 0.0  | 0.1  | 0.0  | 7.7   | 0.0  | 0.0 | 0.0  | 29.5                                             |
| 23                             | 0.9                | 0.5   | 4.2  | 2.6  | 33.8 | 17.2 | 2.2  | 0.1  | 0.0  | 0.1  | 0.6  | 0.0  | 25.2  | 0.1  | 0.0 | 0.0  | 14.7                                             |
| 24                             | 0.3                | 0.0   | 0.3  | 0.7  | 0.2  | 15.3 | 27.8 | 7.0  | 0.1  | 0.1  | 0.6  | 0.0  | 4.1   | 0.0  | 0.1 | 0.0  | 18.5                                             |
| 25                             | 0.0                | 0.0   | 0.0  | 0.0  | 0.0  | 1.9  | 24.9 | 38.9 | 2.1  | 0.0  | 0.1  | 0.0  | 0.4   | 0.0  | 0.2 | 0.0  | 22.7                                             |
| 26                             | 0.3                | 0.0   | 0.1  | 0.0  | 0.1  | 0.8  | 5.0  | 6.7  | 0.4  | 0.1  | 0.1  | 0.0  | 1.1   | 0.0  | 0.1 | 0.0  | 5.0                                              |
| 27                             | 0.2                | 0.0   | 0.9  | 0.9  | 5.4  | 20.3 | 17.3 | 1.0  | 0.0  | 0.0  | 0.1  | 0.0  | 2.4   | 0.0  | 0.0 | 0.0  | 13.8                                             |
| 28                             | 0.0                | 0.0   | 0.0  | 0.0  | 0.0  | 0.0  | 0.1  | 4.6  | 87.4 | 0.0  | 0.0  | 0.0  | 0.8   | 0.0  | 0.4 | 0.0  | 14.9                                             |
| 29                             | 16.9               | 1.2   | 8.5  | 4.9  | 0.1  | 0.7  | 0.2  | 0.0  | 0.0  | 5.0  | 89.5 | 3.7  | 3.1   | 0.0  | 0.1 | 0.0  | 44.3                                             |
| 30                             | 18.9               | 1.3   | 9.3  | 1.8  | 0.2  | 0.6  | 1.0  | 0.3  | 0.2  | 12.6 | 38.1 | 4.0  | 1.5   | 0.0  | 0.3 | 0.0  | 32.6                                             |
| 31                             | 23.7               | 9.0   | 7.5  | 0.1  | 0.0  | 0.0  | 0.1  | 0.1  | 0.0  | 47.9 | 24.1 | 48.4 | 0.6   | 0.1  | 0.3 | 0.0  | 42.8                                             |
| 32                             | 9.0                | 1.1   | 5.1  | 2.0  | 1.4  | 1.2  | 1.0  | 0.2  | 0.1  | 3.1  | 47.3 | 3.2  | 11.1  | 0.0  | 0.6 | 0.0  | 26.5                                             |
| 33                             | 10.7               | 2.4   | 8.6  | 3.6  | 0.7  | 0.9  | 0.7  | 0.1  | 0.0  | 2.8  | 28.4 | 2.4  | 8.8   | 0.0  | 0.2 | 0.0  | 24.9                                             |
| 34                             | 11.7               | 1.5   | 6.8  | 1.3  | 0.6  | 0.9  | 1.2  | 0.4  | 0.2  | 7.5  | 15.2 | 3.2  | 3.2   | 0.0  | 0.3 | 0.1  | 20.2                                             |
| 35                             | 3.9                | 1.2   | 1.2  | 0.1  | 0.2  | 0.2  | 0.3  | 0.3  | 0.1  | 2.8  | 9.2  | 3.3  | 5.6   | 0.1  | 1.4 | 0.0  | 10.7                                             |
| 36                             | 2.3                | 1.2   | 0.8  | 0.0  | 0.1  | 0.0  | 0.1  | 0.1  | 0.1  | 2.0  | 2.2  | 2.2  | 3.6   | 0.2  | 1.1 | 0.1  | 6.3                                              |
| 37                             | 1.0                | 1.1   | 0.3  | 0.0  | 0.0  | 0.0  | 0.0  | 0.1  | 0.3  | 1.9  | 0.2  | 2.3  | 1.0   | 0.3  | 0.5 | 0.3  | 3.3                                              |
| 38                             | 8.9                | 7.4   | 2.5  | 0.0  | 0.0  | 0.0  | 0.0  | 0.0  | 0.0  | 23.3 | 2.0  | 33.9 | 0.4   | 0.3  | 0.6 | 0.1  | 19.5                                             |
| 39                             | 2.3                | 2.4   | 0.8  | 0.0  | 0.0  | 0.0  | 0.2  | 0.2  | 0.0  | 4.8  | 0.7  | 9.1  | 2.2   | 0.5  | 0.5 | 0.0  | 6.4                                              |
| 40                             | 0.0                | 0.0   | 0.0  | 0.0  | 0.0  | 0.0  | 0.0  | 0.0  | 0.0  | 0.0  | 0.0  | 0.0  | 0.0   | 0.0  | 0.0 | 0.0  | 0.1                                              |
| 41                             | 0.0                | 0.0   | 0.0  | 0.0  | 0.0  | 0.0  | 0.0  | 0.0  | 0.3  | 0.0  | 0.0  | 0.0  | 0.0   | 0.0  | 1.1 | 2.2  | 3.7                                              |
| 42                             | 0.0                | 0.0   | 0.0  | 0.0  | 0.0  | 0.0  | 0.0  | 0.0  | 0.5  | 0.0  | 0.0  | 0.1  | 0.0   | 0.1  | 3.5 | 2.6  | 9.3                                              |
| 43                             | 0.1                | 0.4   | 0.0  | 0.0  | 0.0  | 0.0  | 0.0  | 0.0  | 0.2  | 0.3  | 0.0  | 0.6  | 0.2   | 0.9  | 1.2 | 0.5  | 3.5                                              |
| 44                             | 0.1                | 0.4   | 0.0  | 0.0  | 0.0  | 0.0  | 0.0  | 0.0  | 0.2  | 0.3  | 0.0  | 0.7  | 0.8   | 1.0  | 2.9 | 0.2  | 7.1                                              |
| 45                             | 0.4                | 16.8  | 0.1  | 0.0  | 0.0  | 0.0  | 0.0  | 0.0  | 0.1  | 0.5  | 0.0  | 0.3  | 1.2   | 20.3 | 5.1 | 0.2  | 18.9                                             |
| 46                             | 0.7                | 3.3   | 0.3  | 0.1  | 6.1  | 2.7  | 0.8  | 0.2  | 0.3  | 0.2  | 2.7  | 0.5  | 113.4 | 1.1  | 7.0 | 0.1  | 27.8                                             |
| 47                             | 0.1                | 1.1   | 0.0  | 0.0  | 0.0  | 0.0  | 0.0  | 2.3  | 16.8 | 0.1  | 0.0  | 0.2  | 0.2   | 32.8 | 7.4 | 16.0 | 34.7                                             |
| 48                             | 0.1                | 0.0   | 0.0  | 0.0  | 0.0  | 0.0  | 0.0  | 0.2  | 66.3 | 0.2  | 0.0  | 0.1  | 0.5   | 0.9  | 7.0 | 14.0 | 32.7                                             |
| 49                             | 0.0                | 0.1   | 0.0  | 0.0  | 0.0  | 0.0  | 0.0  | 0.0  | 18.7 | 0.3  | 0.0  | 0.1  | 0.0   | 0.5  | 3.2 | 1.5  | 10.8                                             |
| 50                             | 0.1                | 0.2   | 0.0  | 0.0  | 0.0  | 0.0  | 0.1  | 0.0  | 3.9  | 0.0  | 0.0  | 0.0  | 1.1   | 0.0  | 1.7 | 0.4  | 4.8                                              |
| 51                             | 0.6                | 0.0   | 0.2  | 0.0  | 0.0  | 0.0  | 0.0  | 0.0  | 1.6  | 2.3  | 0.0  | 0.0  | 4.1   | 0.0  | 1.7 | 0.2  | 5.1                                              |
| % of genome covered by cluster |                    |       |      |      |      |      |      |      |      |      |      |      |       |      |     |      | All clusters                                     |
|                                |                    |       |      |      |      |      |      |      |      |      |      |      |       |      |     |      | #                                                |
|                                |                    |       |      |      |      |      |      |      |      |      |      |      |       |      |     |      | 6.73                                             |

**Supplementary Figure 7: Comparison with published ChromaSig clusters illustrates increased coverage.** We compared our state assignments to the published ChromaSig<sup>4</sup> annotation based on a subset of 21 datasets (20 methylation marks and H2AZ). As ChromaSig clusters were learned using 4kb intervals but only cluster centers were reported, we extended each of 49,340 reported genomic loci by 2kb in either side, assigning the full 4kb interval to one of the 16 ChromaSig clusters. We computed the fold enrichment of each state for each location assigned to one of the 16 ChromaSig clusters. We then ordered the ChromaSig clusters to match the 51 states based on the states of maximum enrichment for each cluster, resulting in a general mapping of the correspondence between the chromatin states and ChromaSig clusters. We do however find some overlap between promoter and enhancer assignments, likely due to the difference in resolution between the two methods (4kb vs. 200bp intervals). In addition to the difference in resolution, we find a significant difference in coverage. On average, only 7% of the genome is assigned to a ChromaSig cluster, and although it is higher for promoter (30-78%) and intergenic candidate enhancer (20-44%) states, a large majority of most states remain unassigned by ChromaSig. Each entry denotes the fold enrichment for different ChromaSig clusters, the bottom row indicates the total percentage of all 200bp intervals of the genome that each ChromaSig cluster represents, the last column indicates the percentage of the state that was assigned by ChromaSig to any cluster.

a. Bayesian Information Criterion (BIC) score increase with increasing numbers of states

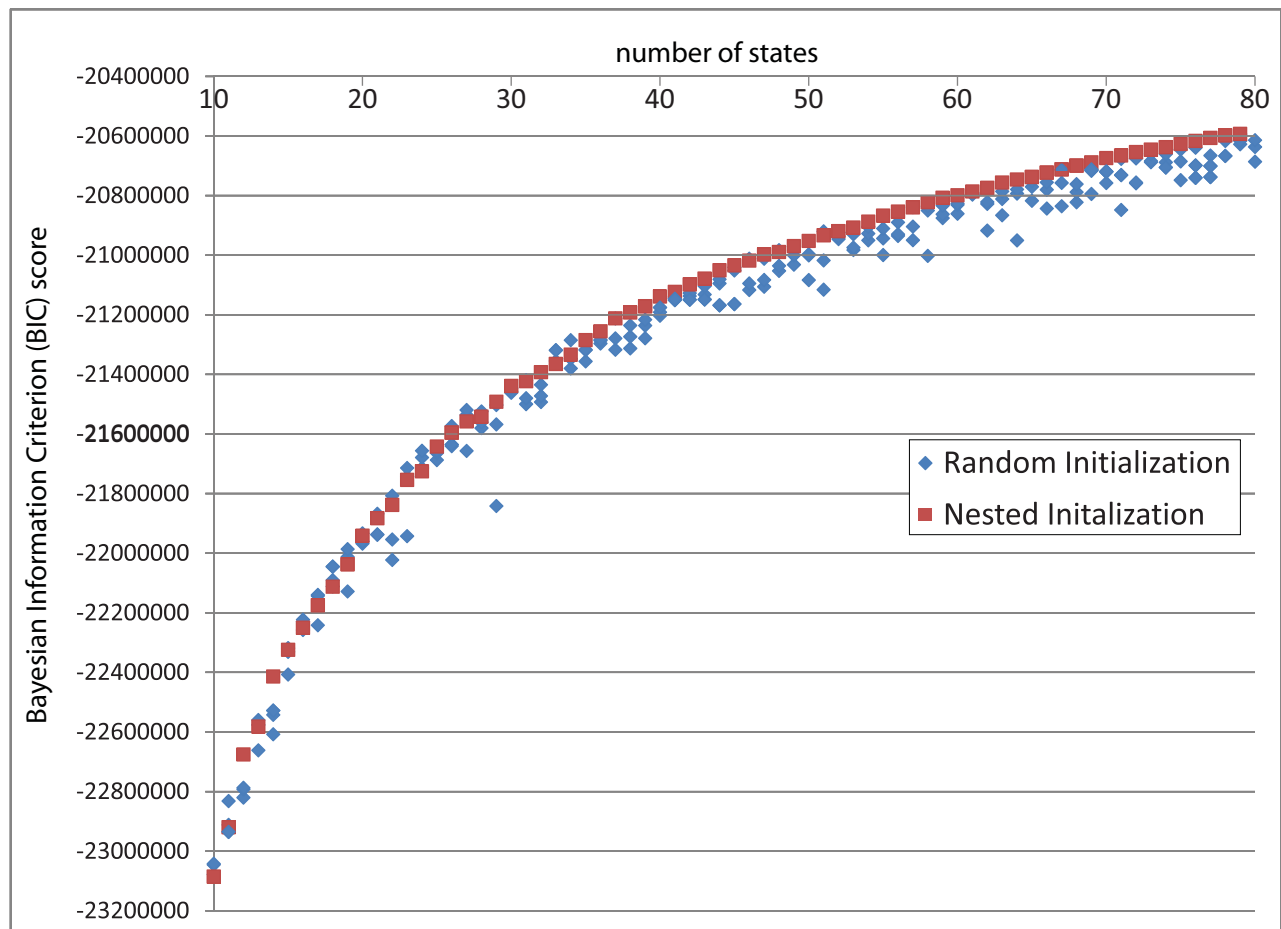

b. Convergence of 79-state model with random initialization

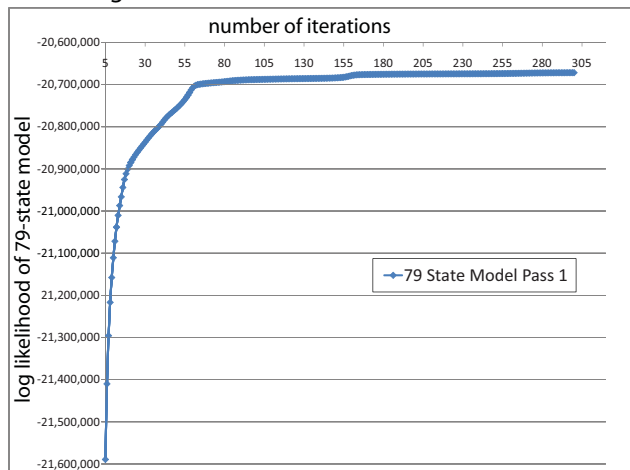

c. Convergence of 51-state model after nested initialization

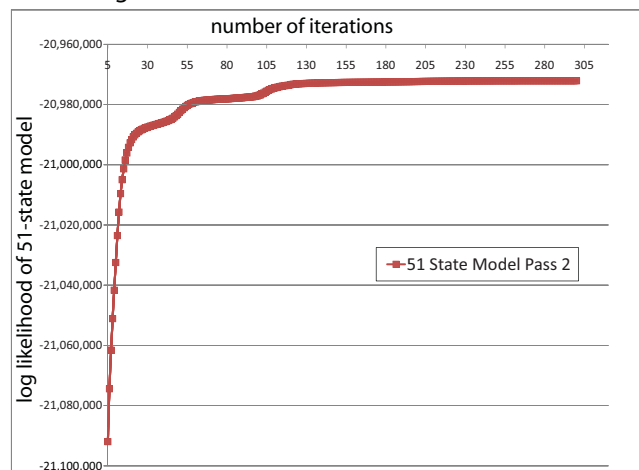

**Supplementary Figure 8: Bayesian Information Criterion (BIC) score with increasing numbers of states and convergence of model training.** (a) BIC score both for models with randomly initialized parameters (blue) and for models based on the nested initialization scheme (red). BIC score for each model is its log likelihood score minus a penalty term, computed as the number of parameters in the model divided by two times the natural log of the number of data points (in our case defined as the number of 200bp intervals). The figure shows the BIC scores of the model based on the nested initialization strategy are greater or comparable to the BIC scores obtained based on random initialization. The figure also shows the BIC score alone is not a sufficient criterion to enable selection of a model with a relatively small number of states for this data as it continued to increase past 70 states (see **Supplementary Notes**). (b and c) The log likelihood of the model versus the number of full iterations of the expectation-maximization algorithm used for parameter learning. Plots shown are for (b) the 79 state model with highest likelihood from the first pass and (c) the 51 state model from the second pass. The plot shows that the 300 iterations used were sufficient for the model training procedure to have essentially converged on a local maximum.

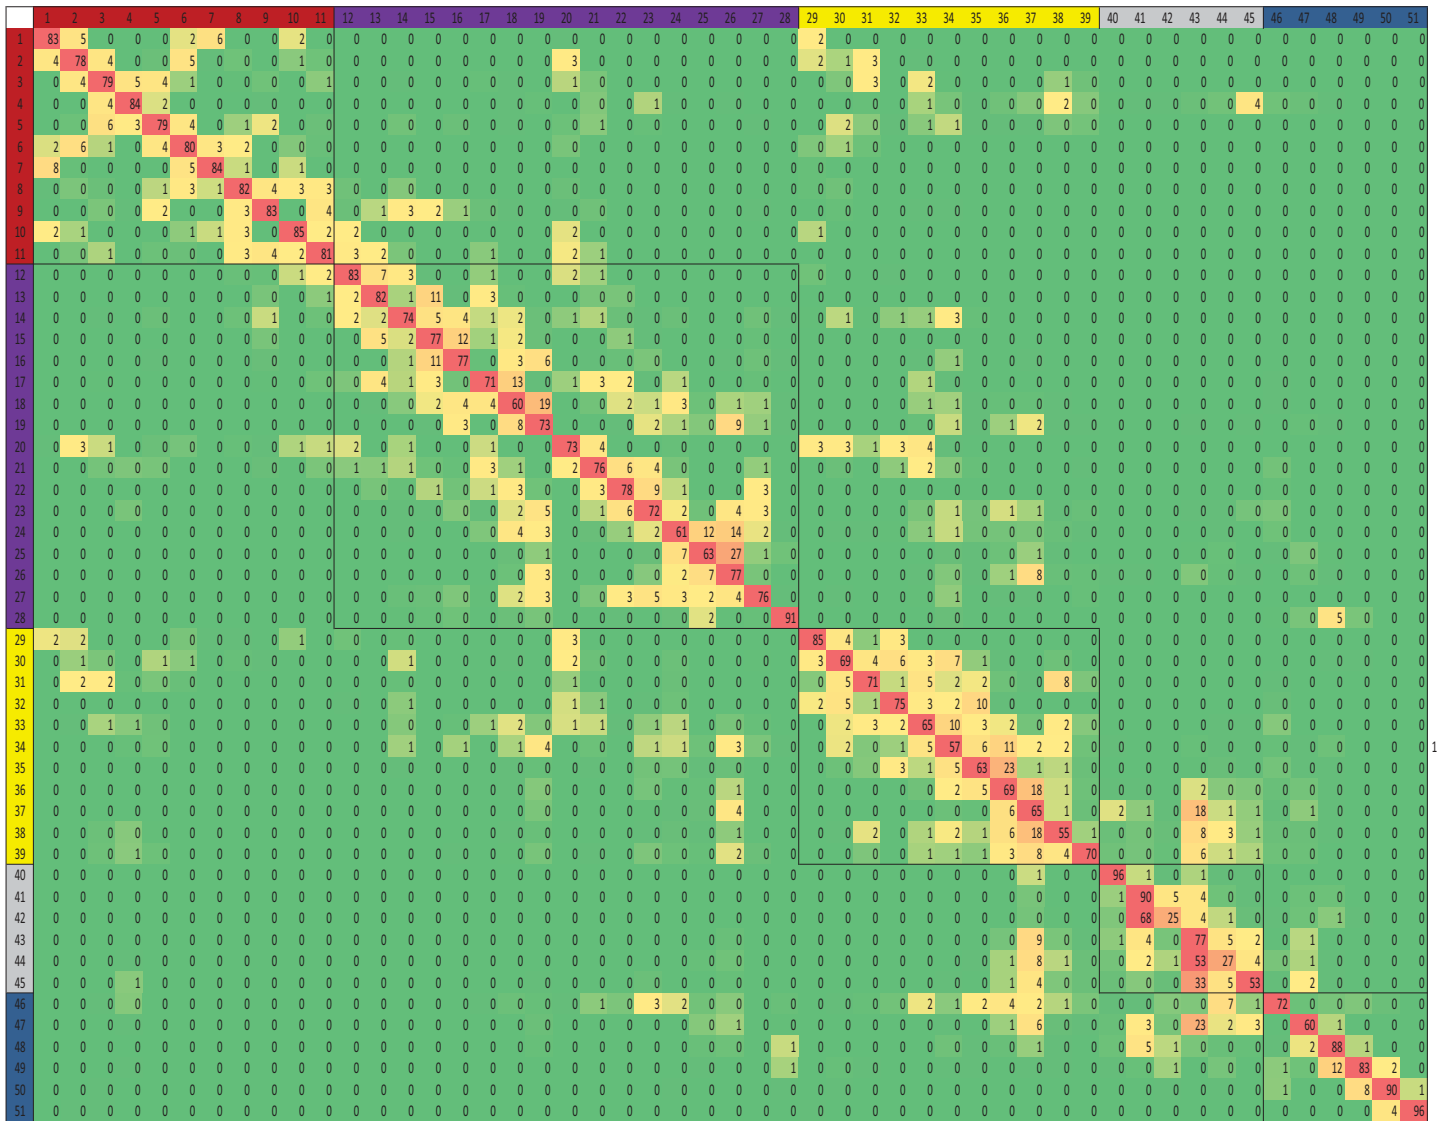

**Supplementary Figure 9: State discrimination with all 41 marks: overlap in posterior probabilities in genome-wide probabilistic assignments.** Given the probabilistic assignment of each genomic location into states, we can evaluate the frequency with which two states show non-zero probability (overlap) in the same genomic interval. Each row (summing to 100%), shows for each state the distribution of overlap in posterior probability for all states, each entry (state1,state2) denoting the average posterior probability of being in state2 for locations assigned to state1. High off diagonal values would denote uncertainty in distinguishing between a given pair of states at specific genomic locations, and specifically the directionality of mis-assignments. Nearly all states (except 42 and 44) contain the majority of the posterior probability at their locations on average, and in most cases substantially more (on average 74%) indicating the states are well-separable according to the model. For states 42 and 44 there is difficulty for the model to confidently distinguish them at any specific location from states 41 and 43 respectively. However for the vast majority of state 41 and 43 the model can be confident they are not 42 and 44 respectively, which is possible due to the high self-transition probabilities for those states.

## Promoter states

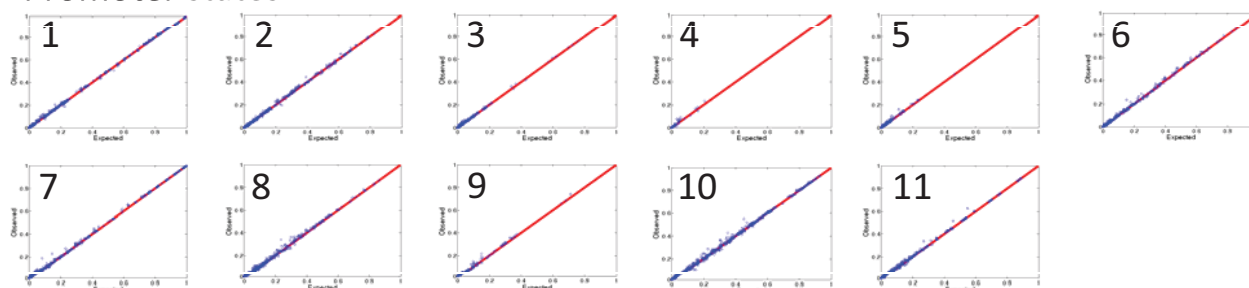

## Transcribed states

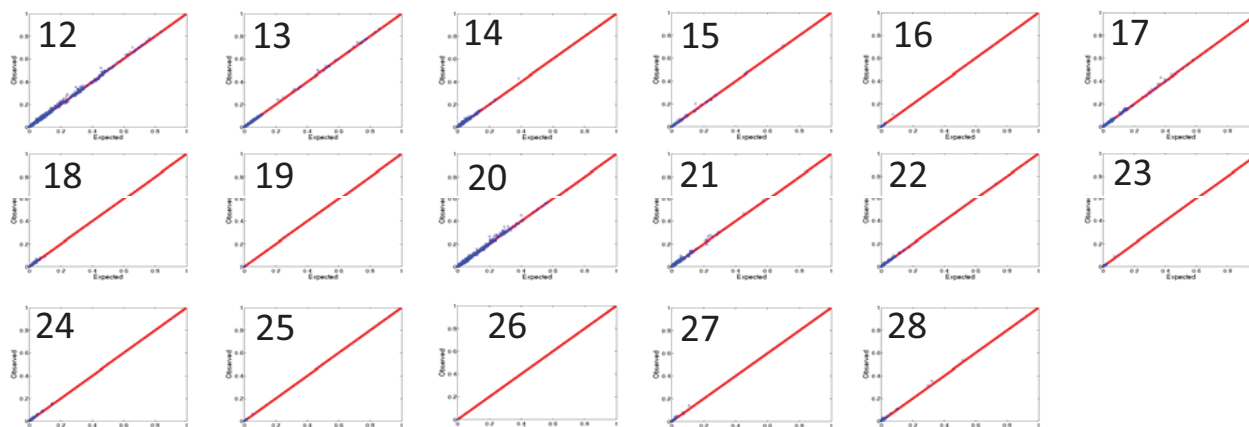

## Active Intergenic states

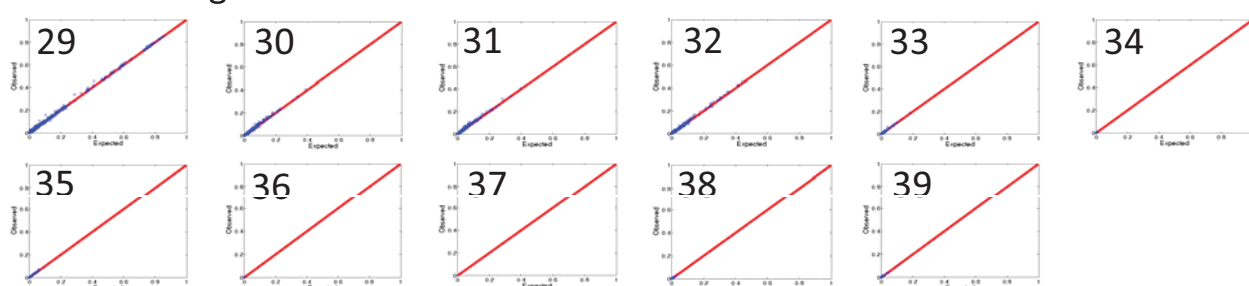

## Repressed states

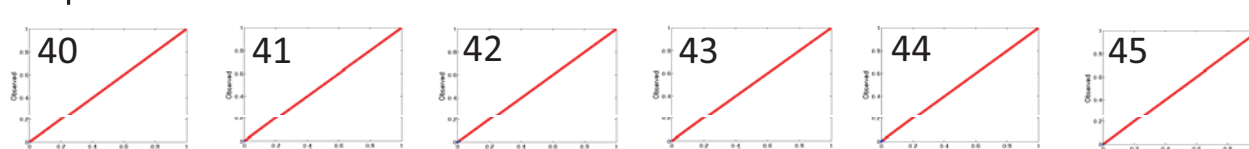

## Repetitive states

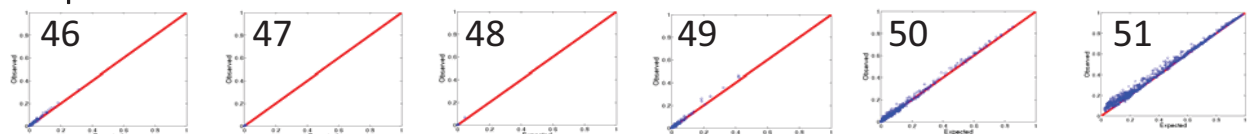

**Supplementary Figure 10: Pairwise expected vs. observed mark co-occurrence for each chromatin state in a 51-state model reveals conditional mark independence.** We evaluated the assumption of conditional independence of each pair of marks in each state of our 51-state model. Each plot corresponds to one state and each point (blue) corresponds to a pair of marks, and compares the expected frequency of a pair of marks being observed together under the model (x-axis, computed by multiplying the emission probabilities of the two marks), compared to how often a pair of marks in a state are actually observed together (y-axis). When the expected count agrees with the observed counts, points will be on the  $x=y$  line (red). The plot validates our model assumption, that conditioned on a state the pairs of marks are independent.

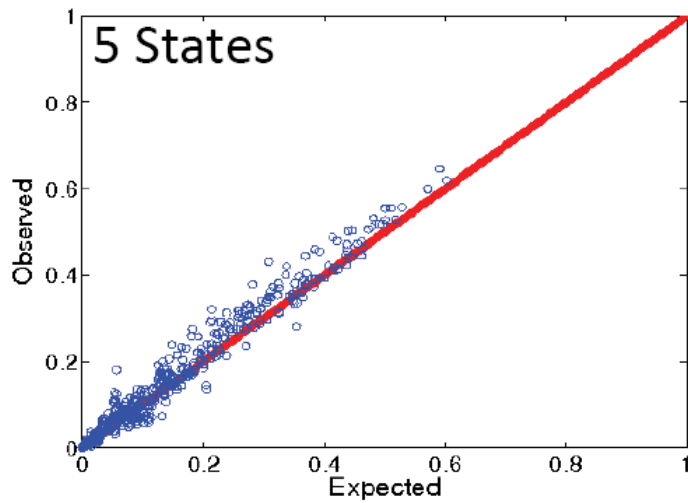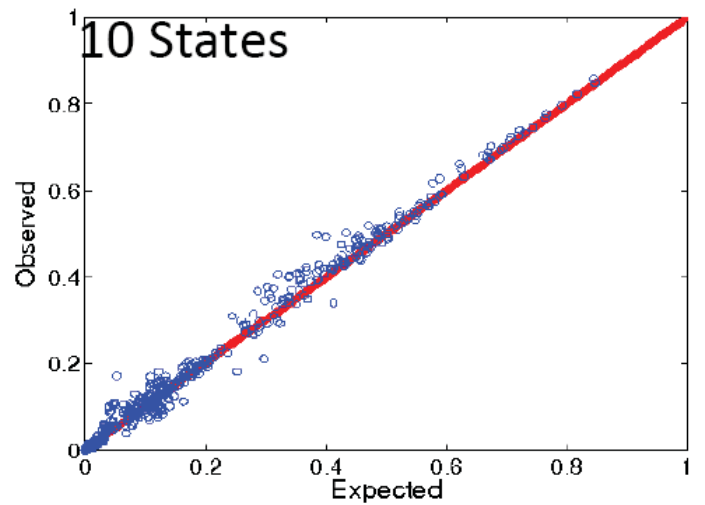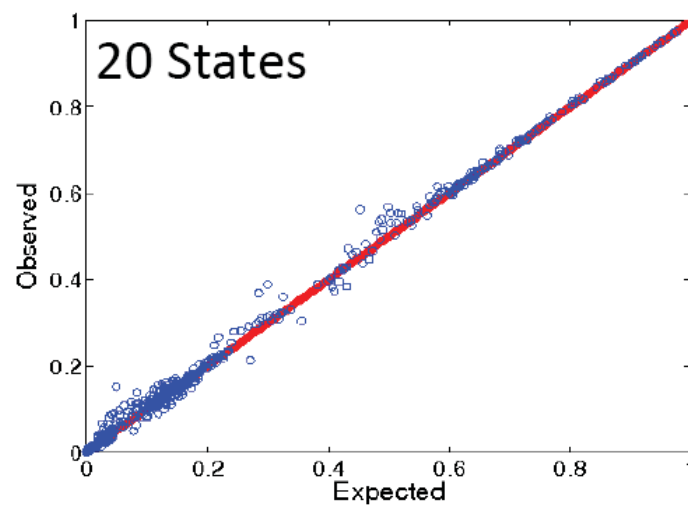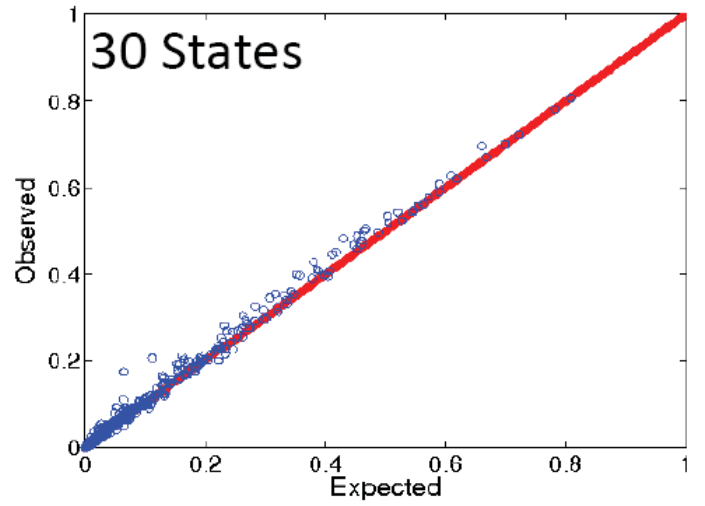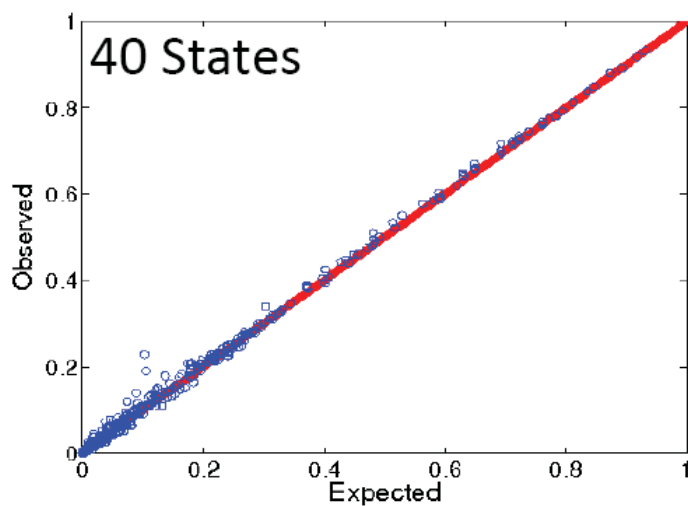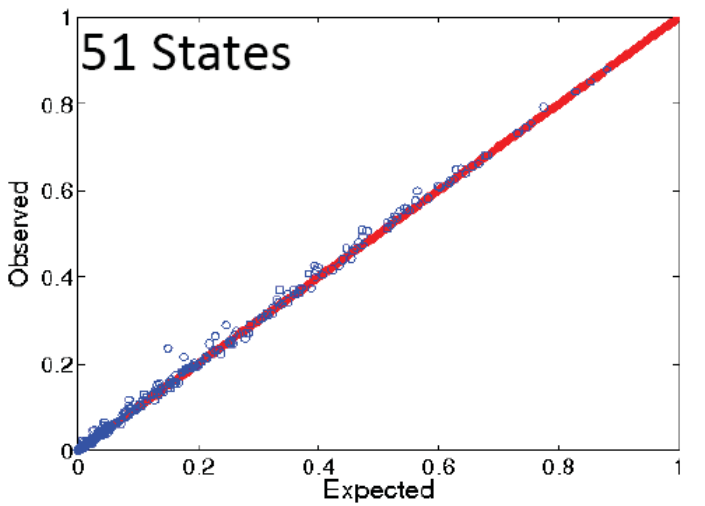

**Supplementary Figure 11: Chromatin marks become conditionally independent with increasing numbers of states.** A pairwise expected vs. observed mark co-occurrence plot as in **Supplementary Figure 10** is shown from models with increasing numbers of states, showing that larger numbers of states better capture the observed dependencies between chromatin marks. Expected vs. observed pairwise counts are shown for models with 5, 10, 20, 30, 40, and all 51 states, as obtained based on our nested initialization procedure. For each plot, we show the state most correlated to state 6 in the 51 state model in terms of the emission parameters. The comparison of the six plots shows that as more states are added, the points become increasingly closer to the  $y=x$  line, meaning that as the number of states increases, pairs of marks become conditionally independent.

| State | H3K14ac | H3K23ac | H3K12ac | H3K9ac | H3K16ac | H3K5ac | H3K91ac | H3K4ac | H3K20ac | H3K18ac | H3K120ac | H3K27ac | H3K5ac | H3K12ac | H3K36ac | H3K5ac | H3K8ac | H3K9ac | PoII | CTCF | H2AZ | H3K4me3 | H3K4me2 | H3K4me1 | H3K9me1 | H3K79me3 | H3K79me2 | H3K79me1 | H3K27me1 | H3K5me1 | H3K20me1 | H3K36me3 | H3K36me1 | H3K2me1 | H3K2me2 | H3K27me2 | H3K27me3 | H3K3me2 | H3K9me2 | H3K9me3 | H3K20me3 | 51 state | Correlation | Best 51-only | Correlation |  |
|-------|---------|---------|---------|--------|---------|--------|---------|--------|---------|---------|----------|---------|--------|---------|---------|--------|--------|--------|------|------|------|---------|---------|---------|---------|----------|----------|----------|----------|---------|----------|----------|----------|---------|---------|----------|----------|---------|---------|---------|----------|----------|-------------|--------------|-------------|--|
| 1     | 4.1     | 26.3    | 24.1    | 14.5   | 35.4    | 15.4   | 92.8    | 92.3   | 91.8    | 98.9    | 99.3     | 99.7    | 98.3   | 72.2    | 85.0    | 93.6   | 90.6   | 86.3   | 44.5 | 14.2 | 98.7 | 99.1    | 97.6    | 65.4    | 92.9    | 4.7      | 4.0      | 14.2     | 24.0     | 11.9    | 3.4      | 0.4      | 3.1      | 1.8     | 2.0     | 0.2      | 0.2      | 0.5     | 0.2     | 1.9     | 1.1      | 1.00     |             |              |             |  |
| 2     | 1.5     | 15.1    | 7.5     | 2.6    | 4.3     | 2.5    | 38.9    | 38.2   | 40.5    | 69.7    | 72.5     | 83.8    | 66.3   | 19.8    | 32.4    | 53.1   | 58.5   | 44.8   | 20.6 | 13.1 | 95.9 | 99.5    | 91.9    | 45.2    | 80.8    | 2.5      | 1.9      | 5.6      | 10.8     | 3.6     | 0.7      | 0.2      | 1.3      | 0.7     | 0.1     | 0.2      | 0.1      | 0.2     | 0.1     | 1.2     | 2.1      | 0.98     |             |              |             |  |
| 3     | 0.3     | 3.5     | 0.8     | 0.7    | 0.4     | 0.3    | 6.7     | 5.1    | 5.8     | 16.2    | 13.7     | 8.9     | 2.9    | 1.0     | 2.1     | 5.5    | 9.7    | 4.3    | 5.7  | 18.1 | 78.8 | 96.8    | 72.2    | 28.0    | 67.9    | 0.3      | 0.1      | 0.4      | 0.9      | 2.0     | 3.8      | 0.1      | 0.2      | 1.3     | 0.7     | 0.1      | 0.1      | 0.2     | 0.1     | 0.2     | 1.3      | 2.1      | 0.99        |              |             |  |
| 4     | 1.2     | 11.7    | 3.7     | 1.4    | 1.2     | 5.1    | 13.5    | 12.8   | 10.6    | 22.5    | 24.1     | 39.5    | 25.6   | 3.9     | 6.4     | 15.5   | 17.0   | 4.7    | 12.9 | 9.6  | 65.1 | 71.2    | 83.1    | 73.9    | 70.5    | 4.1      | 4.5      | 10.6     | 12.4     | 10.1    | 3.1      | 0.7      | 2.6      | 1.8     | 1.5     | 0.3      | 0.2      | 0.2     | 0.2     | 0.1     | 0.7      | 3.0      | 0.95        |              |             |  |
| 5     | 0.1     | 0.6     | 0.1     | 0.4    | 0.3     | 0.2    | 0.9     | 0.5    | 0.4     | 1.2     | 1.3      | 0.3     | 0.2    | 0.0     | 0.0     | 0.1    | 0.1    | 0.2    | 1.1  | 4.6  | 12.2 | 75.3    | 14.6    | 17.8    | 20.4    | 0.3      | 0.0      | 0.0      | 0.0      | 0.0     | 0.9      | 11.7     | 0.2      | 0.2     | 1.3     | 0.8      | 0.0      | 11.3    | 0.1     | 0.1     | 0.5      | 1.3      | 4.0         | 0.99         |             |  |
| 6     | 0.0     | 0.2     | 0.6     | 0.8    | 1.6     | 0.4    | 16.2    | 6.9    | 3.1     | 8.3     | 13.7     | 15.2    | 13.3   | 0.8     | 2.0     | 0.5    | 0.8    | 3.0    | 43.2 | 17.3 | 15.4 | 81.0    | 10.5    | 2.5     | 14.0    | 5.7      | 3.4      | 1.8      | 0.0      | 4.0     | 12.7     | 0.1      | 0.1      | 0.1     | 0.4     | 0.0      | 0.0      | 0.1     | 0.0     | 0.1     | 1.2      | 8.0      | 0.98        |              |             |  |
| 7     | 0.1     | 2.1     | 6.1     | 14.1   | 15.4    | 2.7    | 91.0    | 87.0   | 80.8    | 93.2    | 97.7     | 98.3    | 97.7   | 44.3    | 71.2    | 48.8   | 45.7   | 87.1   | 76.7 | 27.2 | 69.0 | 98.6    | 36.8    | 4.0     | 38.4    | 3.5      | 1.6      | 4.9      | 0.7      | 4.5     | 7.6      | 0.0      | 0.7      | 0.4     | 0.9     | 0.0      | 0.0      | 0.1     | 0.0     | 1.9     | 6.0      | 0.97     |             |              |             |  |
| 8     | 0.0     | 0.8     | 1.7     | 4.0    | 3.6     | 0.8    | 59.7    | 39.6   | 26.9    | 52.5    | 61.4     | 68.8    | 64.4   | 6.3     | 18.5    | 5.1    | 6.8    | 35.8   | 66.2 | 25.7 | 49.2 | 98.5    | 25.8    | 3.1     | 32.8    | 6.3      | 3.4      | 4.8      | 0.2      | 7.1     | 14.6     | 0.0      | 0.5      | 0.4     | 0.9     | 0.0      | 0.0      | 0.1     | 0.1     | 1.6     | 6.0      | 0.97     |             |              |             |  |
| 9     | 2.6     | 15.9    | 34.1    | 55.0   | 75.2    | 18.2   | 99.8    | 100.0  | 99.1    | 100.0   | 100.0    | 100.0   | 93.2   | 99.4    | 97.2    | 93.4   | 99.9   | 91.5   | 28.3 | 85.7 | 99.9 | 52.2    | 6.3     | 48.7    | 26.1    | 18.8     | 13.8     | 3.8      | 5.7      | 10.2    | 0.2      | 1.2      | 0.5      | 1.5     | 0.0     | 0.0      | 0.2      | 0.0     | 1.9     | 7.0     | 0.99     |          |             |              |             |  |
| 10    | 1.3     | 13.6    | 4.6     | 6.3    | 2.5     | 5.5    | 33.7    | 34.9   | 19.6    | 29.0    | 49.4     | 81.8    | 74.9   | 14.5    | 14.6    | 10.0   | 5.7    | 46.3   | 55.8 | 9.8  | 23.5 | 97.1    | 55.5    | 13.2    | 44.9    | 85.9     | 89.8     | 18.9     | 1.3      | 4.2     | 37.1     | 6.5      | 0.3      | 1.0     | 0.9     | 0.0      | 0.0      | 0.0     | 0.4     | 8.0     | 0.97     |          |             |              |             |  |
| 11    | 0.6     | 5.0     | 6.0     | 28.8   | 21.8    | 4.8    | 94.2    | 90.1   | 73.3    | 91.5    | 95.2     | 97.1    | 96.7   | 36.5    | 55.1    | 36.3   | 29.9   | 90.5   | 78.1 | 17.7 | 49.8 | 99.8    | 31.9    | 3.3     | 32.6    | 82.7     | 71.8     | 26.6     | 1.8      | 11.2    | 47.6     | 1.0      | 0.4      | 1.2     | 1.0     | 0.0      | 0.0      | 0.0     | 0.1     | 1.2     | 8.0      | 0.92     |             |              |             |  |
| 12    | 0.4     | 6.5     | 2.6     | 0.9    | 0.4     | 1.7    | 2.7     | 5.5    | 1.6     | 1.5     | 8.7      | 27.4    | 20.7   | 1.8     | 1.9     | 1.4    | 1.4    | 4.8    | 32.3 | 3.8  | 77.9 | 4.4     | 28.3    | 37.7    | 87.3    | 84.0     | 12.8     | 2.5      | 9.0      | 48.4    | 7.4      | 0.3      | 0.5      | 0.8     | 0.0     | 0.1      | 0.0      | 0.2     | 0.5     | 3.0     | 1.00     |          |             |              |             |  |
| 13    | 4.1     | 28.9    | 13.0    | 22.7   | 26.8    | 33.4   | 90.4    | 89.6   | 82.3    | 91.3    | 96.6     | 98.4    | 96.4   | 57.9    | 61.8    | 70.7   | 50.1   | 74.6   | 51.6 | 10.5 | 51.8 | 98.9    | 97.4    | 83.6    | 95.8    | 79.4     | 79.4     | 62.5     | 27.8     | 43.4    | 60.8     | 3.7      | 6.9      | 4.6     | 2.5     | 0.1      | 0.2      | 0.0     | 0.0     | 0.8     | 10.0     | 0.99     |             |              |             |  |
| 14    | 2.0     | 24.2    | 4.8     | 4.4    | 4.0     | 10.5   | 33.0    | 31.7   | 18.3    | 26.1    | 43.4     | 63.6    | 55.0   | 7.4     | 7.7     | 17.0   | 10.2   | 20.1   | 33.6 | 6.6  | 16.6 | 93.0    | 93.9    | 95.6    | 94.9    | 88.4     | 89.1     | 57.9     | 25.9     | 58.3    | 82.2     | 10.6     | 6.9      | 4.6     | 2.7     | 0.1      | 0.0      | 0.3     | 0.1     | 0.1     | 0.6      | 11.0     | 1.00        |              |             |  |
| 15    | 0.4     | 3.1     | 0.9     | 1.8    | 2.2     | 4.6    | 23.5    | 15.4   | 11.5    | 18.6    | 22.6     | 19.8    | 16.6   | 2.2     | 2.5     | 3.4    | 3.2    | 4.1    | 21.8 | 13.0 | 16.8 | 53.9    | 66.3    | 91.8    | 82.3    | 7.5      | 6.7      | 28.1     | 9.7      | 58.1    | 86.7     | 2.4      | 3.8      | 6.0     | 3.5     | 0.1      | 0.6      | 0.3     | 0.0     | 0.0     | 1.1      | 11.0     | 0.84        |              |             |  |
| 16    | 3.0     | 16.1    | 7.6     | 1.8    | 11.5    | 27.0   | 50.2    | 39.2   | 25.9    | 25.0    | 43.5     | 43.8    | 44.1   | 4.8     | 6.1     | 23.3   | 12.2   | 1.4    | 17.1 | 2.6  | 0.3  | 3.0     | 64.8    | 97.4    | 86.1    | 90.5     | 89.8     | 77.1     | 44.8     | 87.1    | 92.1     | 12.6     | 3.5      | 5.6     | 3.2     | 0.3      | 0.0      | 0.5     | 0.2     | 0.0     | 0.3      | 12.0     | 0.99        |              |             |  |
| 17    | 6.1     | 20.6    | 14.7    | 4.6    | 20.5    | 53.9   | 82.2    | 80.4   | 74.2    | 71.3    | 88.1     | 82.8    | 85.2   | 40.9    | 36.0    | 55.4   | 29.1   | 6.1    | 23.6 | 3.8  | 4.3  | 16.2    | 55.7    | 96.5    | 68.1    | 76.5     | 77.6     | 71.0     | 33.2     | 60.9    | 57.2     | 12.1     | 2.5      | 6.7     | 3.8     | 0.2      | 0.0      | 0.6     | 0.4     | 0.1     | 1.0      | 12.0     | 0.89        |              |             |  |
| 18    | 1.9     | 17.2    | 4.2     | 0.9    | 2.1     | 9.0    | 8.3     | 7.1    | 26.2    | 3.6     | 6.6      | 10.2    | 5.6    | 0.5     | 1.2     | 7.8    | 4.5    | 0.5    | 11.2 | 1.7  | 0.1  | 5.3     | 77.0    | 96.7    | 96.5    | 96.9     | 97.5     | 70.3     | 54.6     | 89.4    | 93.8     | 13.3     | 4.1      | 3.8     | 2.2     | 0.3      | 0.0      | 0.3     | 0.2     | 0.1     | 0.1      | 13.0     | 0.99        |              |             |  |
| 19    | 0.5     | 5.3     | 2.8     | 0.4    | 0.2     | 2.1    | 1.3     | 2.1    | 0.6     | 0.6     | 2.3      | 3.5     | 2.1    | 0.3     | 0.6     | 1.9    | 1.7    | 0.1    | 5.3  | 0.9  | 0.0  | 0.7     | 32.5    | 51.7    | 64.4    | 87.9     | 87.3     | 34.8     | 16.9     | 43.2    | 69.1     | 4.0      | 0.5      | 0.5     | 0.6     | 0.1      | 0.0      | 0.1     | 0.2     | 0.0     | 0.1      | 13.0     | 0.97        |              |             |  |
| 20    | 0.2     | 0.8     | 2.5     | 0.6    | 5.2     | 6.6    | 14.7    | 6.2    | 2.7     | 0.9     | 6.7      | 2.5     | 4.9    | 0.5     | 0.4     | 2.0    | 1.4    | 0.1    | 12.9 | 1.2  | 0.0  | 0.2     | 15.0    | 46.2    | 37.9    | 88.6     | 83.1     | 76.0     | 14.8     | 87.1    | 98.5     | 16.7     | 0.9      | 4.7     | 4.1     | 0.1      | 0.0      | 0.8     | 0.1     | 0.2     | 0.9      | 13.0     | 0.92        |              |             |  |
| 21    | 0.9     | 7.6     | 9.5     | 1.2    | 2.4     | 18.7   | 21.3    | 24.8   | 17.6    | 10.4    | 30.3     | 28.0    | 29.6   | 8.5     | 8.4     | 14.7   | 10.6   | 0.5    | 9.4  | 1.9  | 2.3  | 2.5     | 12.6    | 45.4    | 37.9    | 70.8     | 71.4     | 38.7     | 11.7     | 16.8    | 22.2     | 9.2      | 0.3      | 1.8     | 1.1     | 0.2      | 0.0      | 0.1     | 0.3     | 0.2     | 0.6      | 14.0     | 0.99        |              |             |  |
| 22    | 0.0     | 0.2     | 0.6     | 0.2    | 0.1     | 0.3    | 0.1     | 0.2    | 0.1     | 0.2     | 0.1      | 0.2     | 0.1    | 0.0     | 0.1     | 0.1    | 0.3    | 0.0    | 0.6  | 0.3  | 0.0  | 0.0     | 0.7     | 0.4     | 3.1     | 11.1     | 9.4      | 9.8      | 1.2      | 1.4     | 6.0      | 1.7      | 0.0      | 0.1     | 0.2     | 0.0      | 0.0      | 0.0     | 0.0     | 0.1     | 0.0      | 15.0     | 0.93        |              |             |  |
| 23    | 0.2     | 0.9     | 2.9     | 0.4    | 0.8     | 1.9    | 1.2     | 0.9    | 0.2     | 0.1     | 0.7      | 0.8     | 0.7    | 0.2     | 0.2     | 0.7    | 1.2    | 0.1    | 3.9  | 0.7  | 0.0  | 0.0     | 6.0     | 5.5     | 19.2    | 49.5     | 40.6     | 47.3     | 10.5     | 39.4    | 66.5     | 16.3     | 0.3      | 1.5     | 1.3     | 0.2      | 0.0      | 0.2     | 0.2     | 0.5     | 0.4      | 15.0     | 0.89        |              |             |  |
| 24    | 0.2     | 0.9     | 2.7     | 0.2    | 0.2     | 1.1    | 0.3     | 1.0    | 0.3     | 0.1     | 0.9      | 1.1     | 0.9    | 0.2     | 0.4     | 0.3    | 1.0    | 0.0    | 4.2  | 0.7  | 0.0  | 0.1     | 3.5     | 4.1     | 13.0    | 88.8     | 89.3     | 24.0     | 3.8      | 9.9     | 39.9     | 2.1      | 0.1      | 0.4     | 0.6     | 0.0      | 0.0      | 0.1     | 0.8     | 0.1     | 16.0     | 0.95     | 15.0        | 0.97         |             |  |
| 25    | 0.1     | 1.0     | 2.4     | 0.4    | 0.3     | 3.9    | 2.0     | 2.9    | 1.4     | 0.7     | 2.7      | 1.5     | 1.4    | 0.7     | 1.1     | 1.2    | 1.9    | 0.0    | 1.7  | 0.9  | 0.8  | 0.3     | 1.0     | 2.6     | 2.9     | 40.8     | 38.9     | 19.8     | 2.8      | 1.9     | 2.3      | 6.6      | 0.1      | 0.8     | 0.7     | 0.2      | 0.1      | 0.0     | 0.2     | 2.3     | 1.0      | 16.0     | 0.97        |              |             |  |
| 26    | 0.0     | 0.2     | 0.1     | 0.1    | 0.1     | 0.1    | 0.5     | 0.5    | 0.1     | 0.0     | 0.6      | 0.3     | 0.4    | 0.0     | 0.1     | 0.2    | 0.2    | 0.0    | 0.3  | 0.2  | 0.0  | 0.0     | 1.7     | 6.0     | 5.3     | 23.8     | 15.1     | 3.7      | 0.5      | 1.8     | 9.3      | 0.3      | 0.0      | 0.0     | 0.0     | 0.0      | 0.0      | 0.0     | 0.0     | 0.0     | 0.0      | 16.0     | 0.96        |              |             |  |
| 27    | 1.4     | 10.0    | 2.9     | 1.0    | 2.3     | 9.3    | 7.7     | 6.6    | 2.5     | 3.9     | 3.8      | 6.5     | 2.8    | 0.4     | 1.0     | 8.0    | 5.0    | 0.5    | 3.6  | 1.1  | 0.2  | 0.9     | 58.2    | 76.9    | 88.0    | 37.0     | 39.3     | 71.7     | 52.1     | 77.9    | 74.4     | 19.5     | 3.2      | 5.3     | 2.2     | 1.0      | 0.1      | 0.5     | 0.5     | 0.1     | 0.5      | 17.0     | 0.92        |              |             |  |
| 28    | 0.5     | 5.4     | 1.2     | 0.4    | 0.3     | 2.8    | 1.8     | 2.5    | 0.8     | 1.5     | 1.9      | 3.2     | 1.0    | 0.3     | 0.8     | 3.2    | 2.2    | 0.2    | 1.4  | 0.8  | 0.1  | 0.3     | 21.7    | 29.2    | 49.5    | 16.5     | 18.7     | 33.0     | 15.7     | 12.9    | 16.1     | 3.5      | 0.5      | 0.4     | 0.5     | 0.4      | 0.0      | 0.1     | 0.3     | 0.0     | 0.1      | 17.0     | 0.92        |              |             |  |
| 29    | 0.1     | 0.4     | 1.1     | 0.2    | 0.2     | 0.3    | 0.1     | 0.2    | 0.0     | 0.1     | 0.3      | 0.2     | 0.0    | 0.1     | 0.2     | 0.6    | 0.0    | 0.6    | 0.3  | 0.0  | 0.0  | 0.4     | 0.3     | 5.0     | 1.6     | 0.6      | 8.1      | 4.2      | 4.3      | 2.8     | 3.7      | 0.1      | 0.2      | 0.4     | 0.1     | 0.0      | 0.0      | 0.1     | 0.1     | 0.1     | 18.0     | 0.92     |             |              |             |  |
| 30    | 0.1     | 0.4     | 0.3     | 0.2    | 0.0     | 0.9    | 0.2     | 0.4    | 0.1     | 0.1     | 0.3      | 0.1     | 0.1    | 0.1     | 0.2     | 0.2    | 0.0    | 0.2    | 0.3  | 0.0  | 0.0  | 0.4     | 0.5     | 0.5     | 1.2     | 4.2      | 2.8      | 6.2      | 0.5      | 0.4     | 1.1      | 0.9      | 0.1      | 0.4     | 0.2     | 0.1      | 0.2      | 0.6     | 0.1     | 19.0    | 0.98     |          |             |              |             |  |
| 31    | 1.5     | 11.3    | 5.7     | 6.3    | 10.0    | 17.9   | 72.9    | 65.0   | 59.1    | 73.0    | 78.8     | 82.5    | 77.4   | 24.0    | 28.9    | 38.4   | 29.0   | 26.1   | 34.5 | 13.0 | 46.5 | 77.8    | 89.3    | 96.2    | 91.5    | 7.5      | 7.5      | 33.4     | 22.7     | 48.8    | 47.0     | 1.5      | 4.9      | 5.6     | 3.5     | 0.1      | 0.1      | 0.4     | 0.1     | 0.0     | 1.1      | 20.0     | 0.92        |              |             |  |
| 32    | 1.9     | 15.2    | 6.6     | 1.5    | 4.8     | 14.3   | 20.9    | 19.1   | 11.0    | 18.2    | 16.9     | 43.4    | 27.7   | 2.0     | 4.4     | 30.4   | 25.0   | 1.6    | 8.4  | 3.1  | 4.9  | 3.0     | 43.5    | 81.6    | 67.1    | 5.       |          |          |          |         |          |          |          |         |         |          |          |         |         |         |          |          |             |              |             |  |

| a  | b   | c  | d  | e  | f  | g  | h  | i  | j  | k  | l  | m  | n  | o  | p  | q  | r  | s  | t  | u  | v  | w  | x  | y  | z  |
|----|-----|----|----|----|----|----|----|----|----|----|----|----|----|----|----|----|----|----|----|----|----|----|----|----|----|
| 1  | 100 | 97 | 88 | 91 | 92 | 90 | 85 | 95 | 96 | 87 | 89 | 80 | 92 | 92 | 92 | 97 | 97 | 97 | 97 | 97 | 97 | 97 | 97 | 97 | 97 |
| 2  | 100 | 97 | 88 | 91 | 92 | 90 | 85 | 95 | 96 | 87 | 89 | 80 | 92 | 92 | 92 | 97 | 97 | 97 | 97 | 97 | 97 | 97 | 97 | 97 | 97 |
| 3  | 100 | 97 | 88 | 91 | 92 | 90 | 85 | 95 | 96 | 87 | 89 | 80 | 92 | 92 | 92 | 97 | 97 | 97 | 97 | 97 | 97 | 97 | 97 | 97 | 97 |
| 4  | 100 | 97 | 88 | 91 | 92 | 90 | 85 | 95 | 96 | 87 | 89 | 80 | 92 | 92 | 92 | 97 | 97 | 97 | 97 | 97 | 97 | 97 | 97 | 97 | 97 |
| 5  | 100 | 97 | 88 | 91 | 92 | 90 | 85 | 95 | 96 | 87 | 89 | 80 | 92 | 92 | 92 | 97 | 97 | 97 | 97 | 97 | 97 | 97 | 97 | 97 | 97 |
| 6  | 100 | 97 | 88 | 91 | 92 | 90 | 85 | 95 | 96 | 87 | 89 | 80 | 92 | 92 | 92 | 97 | 97 | 97 | 97 | 97 | 97 | 97 | 97 | 97 | 97 |
| 7  | 100 | 97 | 88 | 91 | 92 | 90 | 85 | 95 | 96 | 87 | 89 | 80 | 92 | 92 | 92 | 97 | 97 | 97 | 97 | 97 | 97 | 97 | 97 | 97 | 97 |
| 8  | 100 | 97 | 88 | 91 | 92 | 90 | 85 | 95 | 96 | 87 | 89 | 80 | 92 | 92 | 92 | 97 | 97 | 97 | 97 | 97 | 97 | 97 | 97 | 97 | 97 |
| 9  | 100 | 97 | 88 | 91 | 92 | 90 | 85 | 95 | 96 | 87 | 89 | 80 | 92 | 92 | 92 | 97 | 97 | 97 | 97 | 97 | 97 | 97 | 97 | 97 | 97 |
| 10 | 100 | 97 | 88 | 91 | 92 | 90 | 85 | 95 | 96 | 87 | 89 | 80 | 92 | 92 | 92 | 97 | 97 | 97 | 97 | 97 | 97 | 97 | 97 | 97 | 97 |
| 11 | 100 | 97 | 88 | 91 | 92 | 90 | 85 | 95 | 96 | 87 | 89 | 80 | 92 | 92 | 92 | 97 | 97 | 97 | 97 | 97 | 97 | 97 | 97 | 97 | 97 |
| 12 | 100 | 97 | 88 | 91 | 92 | 90 | 85 | 95 | 96 | 87 | 89 | 80 | 92 | 92 | 92 | 97 | 97 | 97 | 97 | 97 | 97 | 97 | 97 | 97 | 97 |
| 13 | 100 | 97 | 88 | 91 | 92 | 90 | 85 | 95 | 96 | 87 | 89 | 80 | 92 | 92 | 92 | 97 | 97 | 97 | 97 | 97 | 97 | 97 | 97 | 97 | 97 |
| 14 | 100 | 97 | 88 | 91 | 92 | 90 | 85 | 95 | 96 | 87 | 89 | 80 | 92 | 92 | 92 | 97 | 97 | 97 | 97 | 97 | 97 | 97 | 97 | 97 | 97 |
| 15 | 100 | 97 | 88 | 91 | 92 | 90 | 85 | 95 | 96 | 87 | 89 | 80 | 92 | 92 | 92 | 97 | 97 | 97 | 97 | 97 | 97 | 97 | 97 | 97 | 97 |
| 16 | 100 | 97 | 88 | 91 | 92 | 90 | 85 | 95 | 96 | 87 | 89 | 80 | 92 | 92 | 92 | 97 | 97 | 97 | 97 | 97 | 97 | 97 | 97 | 97 | 97 |
| 17 | 100 | 97 | 88 | 91 | 92 | 90 | 85 | 95 | 96 | 87 | 89 | 80 | 92 | 92 | 92 | 97 | 97 | 97 | 97 | 97 | 97 | 97 | 97 | 97 | 97 |
| 18 | 100 | 97 | 88 | 91 | 92 | 90 | 85 | 95 | 96 | 87 | 89 | 80 | 92 | 92 | 92 | 97 | 97 | 97 | 97 | 97 | 97 | 97 | 97 | 97 | 97 |
| 19 | 100 | 97 | 88 | 91 | 92 | 90 | 85 | 95 | 96 | 87 | 89 | 80 | 92 | 92 | 92 | 97 | 97 | 97 | 97 | 97 | 97 | 97 | 97 | 97 | 97 |
| 20 | 100 | 97 | 88 | 91 | 92 | 90 | 85 | 95 | 96 | 87 | 89 | 80 | 92 | 92 | 92 | 97 | 97 | 97 | 97 | 97 | 97 | 97 | 97 | 97 | 97 |
| 21 | 100 | 97 | 88 | 91 | 92 | 90 | 85 | 95 | 96 | 87 | 89 | 80 | 92 | 92 | 92 | 97 | 97 | 97 | 97 | 97 | 97 | 97 | 97 | 97 | 97 |
| 22 | 100 | 97 | 88 | 91 | 92 | 90 | 85 | 95 | 96 | 87 | 89 | 80 | 92 | 92 | 92 | 97 | 97 | 97 | 97 | 97 | 97 | 97 | 97 | 97 | 97 |
| 23 | 100 | 97 | 88 | 91 | 92 | 90 | 85 | 95 | 96 | 87 | 89 | 80 | 92 | 92 | 92 | 97 | 97 | 97 | 97 | 97 | 97 | 97 | 97 | 97 | 97 |
| 24 | 100 | 97 | 88 | 91 | 92 | 90 | 85 | 95 | 96 | 87 | 89 | 80 | 92 | 92 | 92 | 97 | 97 | 97 | 97 | 97 | 97 | 97 | 97 | 97 | 97 |
| 25 | 100 | 97 | 88 | 91 | 92 | 90 | 85 | 95 | 96 | 87 | 89 | 80 | 92 | 92 | 92 | 97 | 97 | 97 | 97 | 97 | 97 | 97 | 97 | 97 | 97 |
| 26 | 100 | 97 | 88 | 91 | 92 | 90 | 85 | 95 | 96 | 87 | 89 | 80 | 92 | 92 | 92 | 97 | 97 | 97 | 97 | 97 | 97 | 97 | 97 | 97 | 97 |
| 27 | 100 | 97 | 88 | 91 | 92 | 90 | 85 | 95 | 96 | 87 | 89 | 80 | 92 | 92 | 92 | 97 | 97 | 97 | 97 | 97 | 97 | 97 | 97 | 97 | 97 |
| 28 | 100 | 97 | 88 | 91 | 92 | 90 | 85 | 95 | 96 | 87 | 89 | 80 | 92 | 92 | 92 | 97 | 97 | 97 | 97 | 97 | 97 | 97 | 97 | 97 | 97 |
| 29 | 100 | 97 | 88 | 91 | 92 | 90 | 85 | 95 | 96 | 87 | 89 | 80 | 92 | 92 | 92 | 97 | 97 | 97 | 97 | 97 | 97 | 97 | 97 | 97 | 97 |
| 30 | 100 | 97 | 88 | 91 | 92 | 90 | 85 | 95 | 96 | 87 | 89 | 80 | 92 | 92 | 92 | 97 | 97 | 97 | 97 | 97 | 97 | 97 | 97 | 97 | 97 |
| 31 | 100 | 97 | 88 | 91 | 92 | 90 | 85 | 95 | 96 | 87 | 89 | 80 | 92 | 92 | 92 | 97 | 97 | 97 | 97 | 97 | 97 | 97 | 97 | 97 | 97 |
| 32 | 100 | 97 | 88 | 91 | 92 | 90 | 85 | 95 | 96 | 87 | 89 | 80 | 92 | 92 | 92 | 97 | 97 | 97 | 97 | 97 | 97 | 97 | 97 | 97 | 97 |
| 33 | 100 | 97 | 88 | 91 | 92 | 90 | 85 | 95 | 96 | 87 | 89 | 80 | 92 | 92 | 92 | 97 | 97 | 97 | 97 | 97 | 97 | 97 | 97 | 97 | 97 |
| 34 | 100 | 97 | 88 | 91 | 92 | 90 | 85 | 95 | 96 | 87 | 89 | 80 | 92 | 92 | 92 | 97 | 97 | 97 | 97 | 97 | 97 | 97 | 97 | 97 | 97 |
| 35 | 100 | 97 | 88 | 91 | 92 | 90 | 85 | 95 | 96 | 87 | 89 | 80 | 92 | 92 | 92 | 97 | 97 | 97 | 97 | 97 | 97 | 97 | 97 | 97 | 97 |
| 36 | 100 | 97 | 88 | 91 | 92 | 90 | 85 | 95 | 96 | 87 | 89 | 80 | 92 | 92 | 92 | 97 | 97 | 97 | 97 | 97 | 97 | 97 | 97 | 97 | 97 |
| 37 | 100 | 97 | 88 | 91 | 92 | 90 | 85 | 95 | 96 | 87 | 89 | 80 | 92 | 92 | 92 | 97 | 97 | 97 | 97 | 97 | 97 | 97 | 97 | 97 | 97 |
| 38 | 100 | 97 | 88 | 91 | 92 | 90 | 85 | 95 | 96 | 87 | 89 | 80 | 92 | 92 | 92 | 97 | 97 | 97 | 97 | 97 | 97 | 97 | 97 | 97 | 97 |
| 39 | 100 | 97 | 88 | 91 | 92 | 90 | 85 | 95 | 96 | 87 | 89 | 80 | 92 | 92 | 92 | 97 | 97 | 97 | 97 | 97 | 97 | 97 | 97 | 97 | 97 |
| 40 | 100 | 97 | 88 | 91 | 92 | 90 | 85 | 95 | 96 | 87 | 89 | 80 | 92 | 92 | 92 | 97 | 97 | 97 | 97 | 97 | 97 | 97 | 97 | 97 | 97 |
| 41 | 100 | 97 | 88 | 91 | 92 | 90 | 85 | 95 | 96 | 87 | 89 | 80 | 92 | 92 | 92 | 97 | 97 | 97 | 97 | 97 | 97 | 97 | 97 | 97 | 97 |
| 42 | 100 | 97 | 88 | 91 | 92 | 90 | 85 | 95 | 96 | 87 | 89 | 80 | 92 | 92 | 92 | 97 | 97 | 97 | 97 | 97 | 97 | 97 | 97 | 97 | 97 |
| 43 | 100 | 97 | 88 | 91 | 92 | 90 | 85 | 95 | 96 | 87 | 89 | 80 | 92 | 92 | 92 | 97 | 97 | 97 | 97 | 97 | 97 | 97 | 97 | 97 | 97 |
| 44 | 100 | 97 | 88 | 91 | 92 | 90 | 85 | 95 | 96 | 87 | 89 | 80 | 92 | 92 | 92 | 97 | 97 | 97 | 97 | 97 | 97 | 97 | 97 | 97 | 97 |
| 45 | 100 | 97 | 88 | 91 | 92 | 90 | 85 | 95 | 96 | 87 | 89 | 80 | 92 | 92 | 92 | 97 | 97 | 97 | 97 | 97 | 97 | 97 | 97 | 97 | 97 |
| 46 | 100 | 97 | 88 | 91 | 92 | 90 | 85 | 95 | 96 | 87 | 89 | 80 | 92 | 92 | 92 | 97 | 97 | 97 | 97 | 97 | 97 | 97 | 97 | 97 | 97 |
| 47 | 100 | 97 | 88 | 91 | 92 | 90 | 85 | 95 | 96 | 87 | 89 | 80 | 92 | 92 | 92 | 97 | 97 | 97 | 97 | 97 | 97 | 97 | 97 | 97 | 97 |
| 48 | 100 | 97 | 88 | 91 | 92 | 90 | 85 | 95 | 96 | 87 | 89 | 80 | 92 | 92 | 92 | 97 | 97 | 97 | 97 | 97 | 97 | 97 | 97 | 97 | 97 |
| 49 | 100 | 97 | 88 | 91 | 92 | 90 | 85 | 95 | 96 | 87 | 89 | 80 | 92 | 92 | 92 | 97 | 97 | 97 | 97 | 97 | 97 | 97 | 97 | 97 | 97 |
| 50 | 100 | 97 | 88 | 91 | 92 | 90 | 85 | 95 | 96 | 87 | 89 | 80 | 92 | 92 | 92 | 97 | 97 | 97 | 97 | 97 | 97 | 97 | 97 | 97 | 97 |
| 51 | 100 | 97 | 88 | 91 | 92 | 90 | 85 | 95 | 96 | 87 | 89 | 80 | 92 | 92 | 92 | 97 | 97 | 97 | 97 | 97 | 97 | 97 | 97 | 97 | 97 |
| 52 | 100 | 97 | 88 | 91 | 92 | 90 | 85 | 95 | 96 | 87 | 89 | 80 | 92 | 92 | 92 | 97 | 97 | 97 | 97 | 97 | 97 | 97 | 97 | 97 | 97 |
| 53 | 100 | 97 | 88 | 91 | 92 | 90 | 85 | 95 | 96 | 87 | 89 | 80 | 92 | 92 | 92 | 97 | 97 | 97 | 97 | 97 | 97 | 97 | 97 | 97 | 97 |
| 54 | 100 | 97 | 88 | 91 | 92 | 90 | 85 | 95 | 96 | 87 | 89 | 80 | 92 | 92 | 92 | 97 | 97 | 97 | 97 | 97 | 97 | 97 | 97 | 97 | 97 |
| 55 | 100 | 97 | 88 | 91 | 92 | 90 | 85 | 95 | 96 | 87 | 89 | 80 | 92 | 92 | 92 | 97 | 97 | 97 | 97 | 97 | 97 | 97 | 97 | 97 | 97 |
| 56 | 100 | 97 | 88 | 91 | 92 | 90 | 85 | 95 | 96 | 87 | 89 | 80 | 92 | 92 | 92 | 97 | 97 | 97 | 97 | 97 | 97 | 97 | 97 | 97 | 97 |
| 57 | 100 | 97 | 88 | 91 | 92 | 90 | 85 | 95 | 96 | 87 | 89 | 80 | 92 | 92 | 92 | 97 | 97 | 97 | 97 | 97 | 97 | 97 | 97 | 97 | 97 |
| 58 | 100 | 97 | 88 | 91 | 92 | 90 | 85 | 95 | 96 | 87 | 89 | 80 | 92 | 92 | 92 | 97 | 97 | 97 | 97 | 97 | 97 | 97 | 97 | 97 | 97 |
| 59 | 100 | 97 | 88 | 91 | 92 | 90 | 85 | 95 | 96 | 87 | 89 | 80 | 92 | 92 | 92 | 97 | 97 | 97 | 97 | 97 | 97 | 97 | 97 | 97 | 97 |
| 60 | 100 | 97 | 88 | 91 | 92 | 90 | 85 | 95 | 96 | 87 | 89 | 80 | 92 | 92 | 92 | 97 | 97 | 97 | 97 | 97 | 97 | 97 | 97 | 97 | 97 |
| 61 | 100 | 97 | 88 | 91 | 92 | 90 | 85 | 95 | 96 | 87 | 89 | 80 | 92 | 92 | 92 | 97 | 97 | 97 | 97 | 97 | 97 | 97 | 97 | 97 | 97 |
| 62 | 100 | 97 | 88 | 91 | 92 | 90 | 85 | 95 | 96 | 87 | 89 | 80 | 92 | 92 | 92 | 97 | 97 | 97 | 97 | 97 | 97 | 97 | 97 | 97 | 97 |
| 63 | 100 | 97 | 88 | 91 | 92 | 90 | 85 | 95 | 96 | 87 | 89 | 80 | 92 | 92 | 92 | 97 | 97 | 97 | 97 | 97 | 97 | 97 | 97 | 97 | 97 |
| 64 | 100 | 97 | 88 | 91 | 92 | 90 | 85 | 95 | 96 | 87 | 89 | 80 | 92 | 92 | 92 | 97 | 97 | 97 | 97 | 97 | 97 | 97 | 97 | 97 | 97 |
| 65 | 100 | 97 | 88 | 91 | 92 | 90 | 85 | 95 | 96 | 87 | 89 | 80 | 92 | 92 | 92 | 97 | 97 | 97 | 97 | 97 | 97 | 97 | 97 | 97 | 97 |
| 66 | 100 | 97 | 88 | 91 | 92 | 90 | 85 | 95 | 96 | 87 | 89 | 80 |    |    |    |    |    |    |    |    |    |    |    |    |    |

[illegible]

**Supplementary Figure 13: Advantage of nested-initialization strategy for consistent state recovery using a small number of states.**

**a. State recovery using random-initialization strategy.** Recovery of each state of 79-state model (rows) with randomly-initialized models at increasing numbers of states (columns). Each entry denotes the correlation (multiplied by 100 for clarity) between the emission matrix of the 79-state model (as shown in **Supplementary Figure 12**), and the emission matrix of the best-correlated state in the randomly-initialized model. The figure shows that some states (e.g. 64, 72) are recovered under some random initializations with few states but not recovered in other random initializations with more states, in contrast to nested-initialization model shown in the bottom panel.

**b. State recovery for nested-initialization strategy.** Same recovery values shown for nested-initialization models. This figure shows that once a state is recovered by a lower-complexity model, it is then consistently recovered for higher-complexity models in most cases. Black box denotes the 51-state nested-initialization model which was analyzed in detail in this paper, selected as the model with the smallest number of states that recovered the end of transcription state (state 27 in the 51-state model, state 46 in the 79-state model).

a. Enrichment and coverage of TG simple-repeats by simple-repeat state (State 46 in 51-state model)

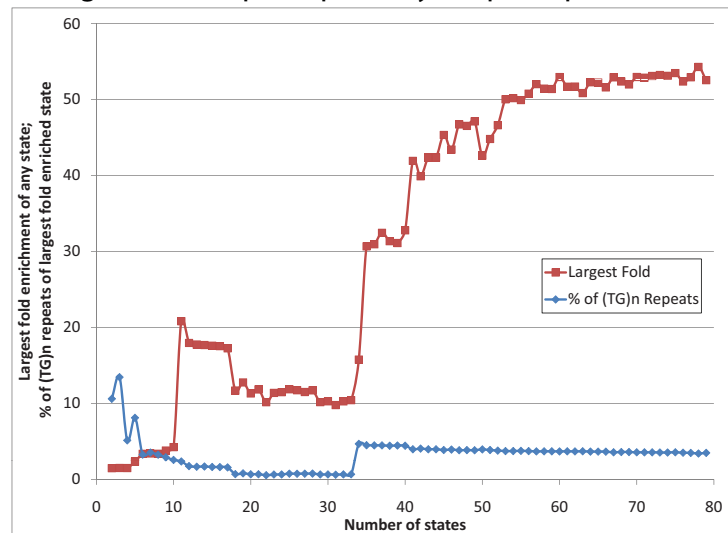

b. Enrichment and coverage of Transcription End Sites by end of transcription state (State 27 in 51-state model)

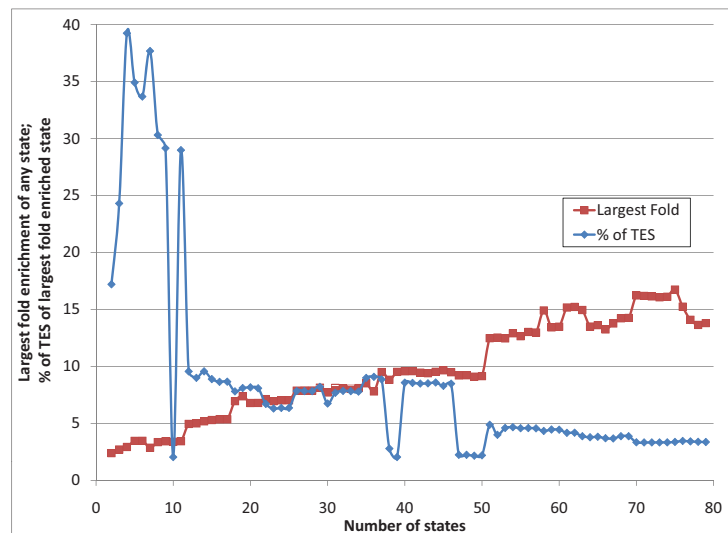

c. Enrichment and coverage of Zinc Finger genes by ZNF state (State 28 in 51-state model)

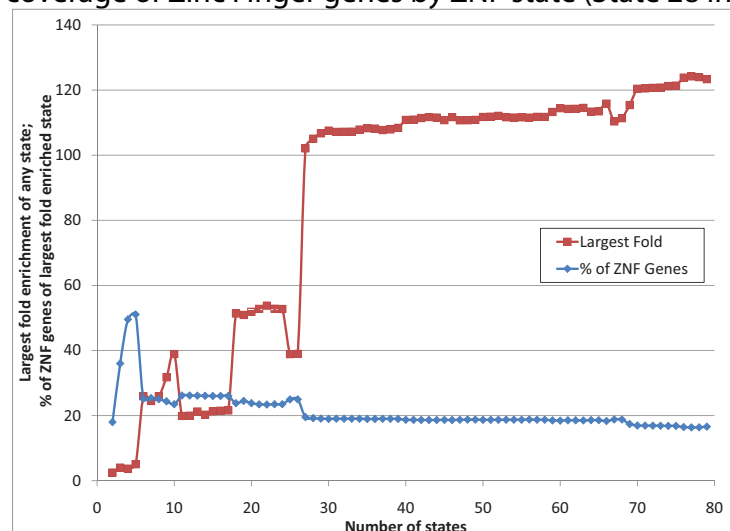

**Supplementary Figure 14: Maximal state enrichments for three different types of genomic elements by models of increasing numbers of states.** Each plot shows the maximal fold enrichment for the genomic element across all available states in the set of nested initialized models (**Supplementary Figure 13b**) (red line), and the corresponding coverage for that state (blue line), for models with increasing numbers of states. **a. TG simple repeats.** For models with at least 35 states, a state of the model has greater than 30 fold enrichment for TG simple repeats recovering about 4% of all TG simple repeats, which was not observed in models with fewer numbers of states **b. Transcription End Sites.** For models with at least 51 states, the largest enrichment becomes consistently greater than 12-fold, while capturing approximately 5% of all transcription end sites. **c. ZNF genes.** For models with at least 27 states, the enrichment for ZNF genes is consistently greater than 100-fold, while a single state captures approximately 20% of all ZNF genes.

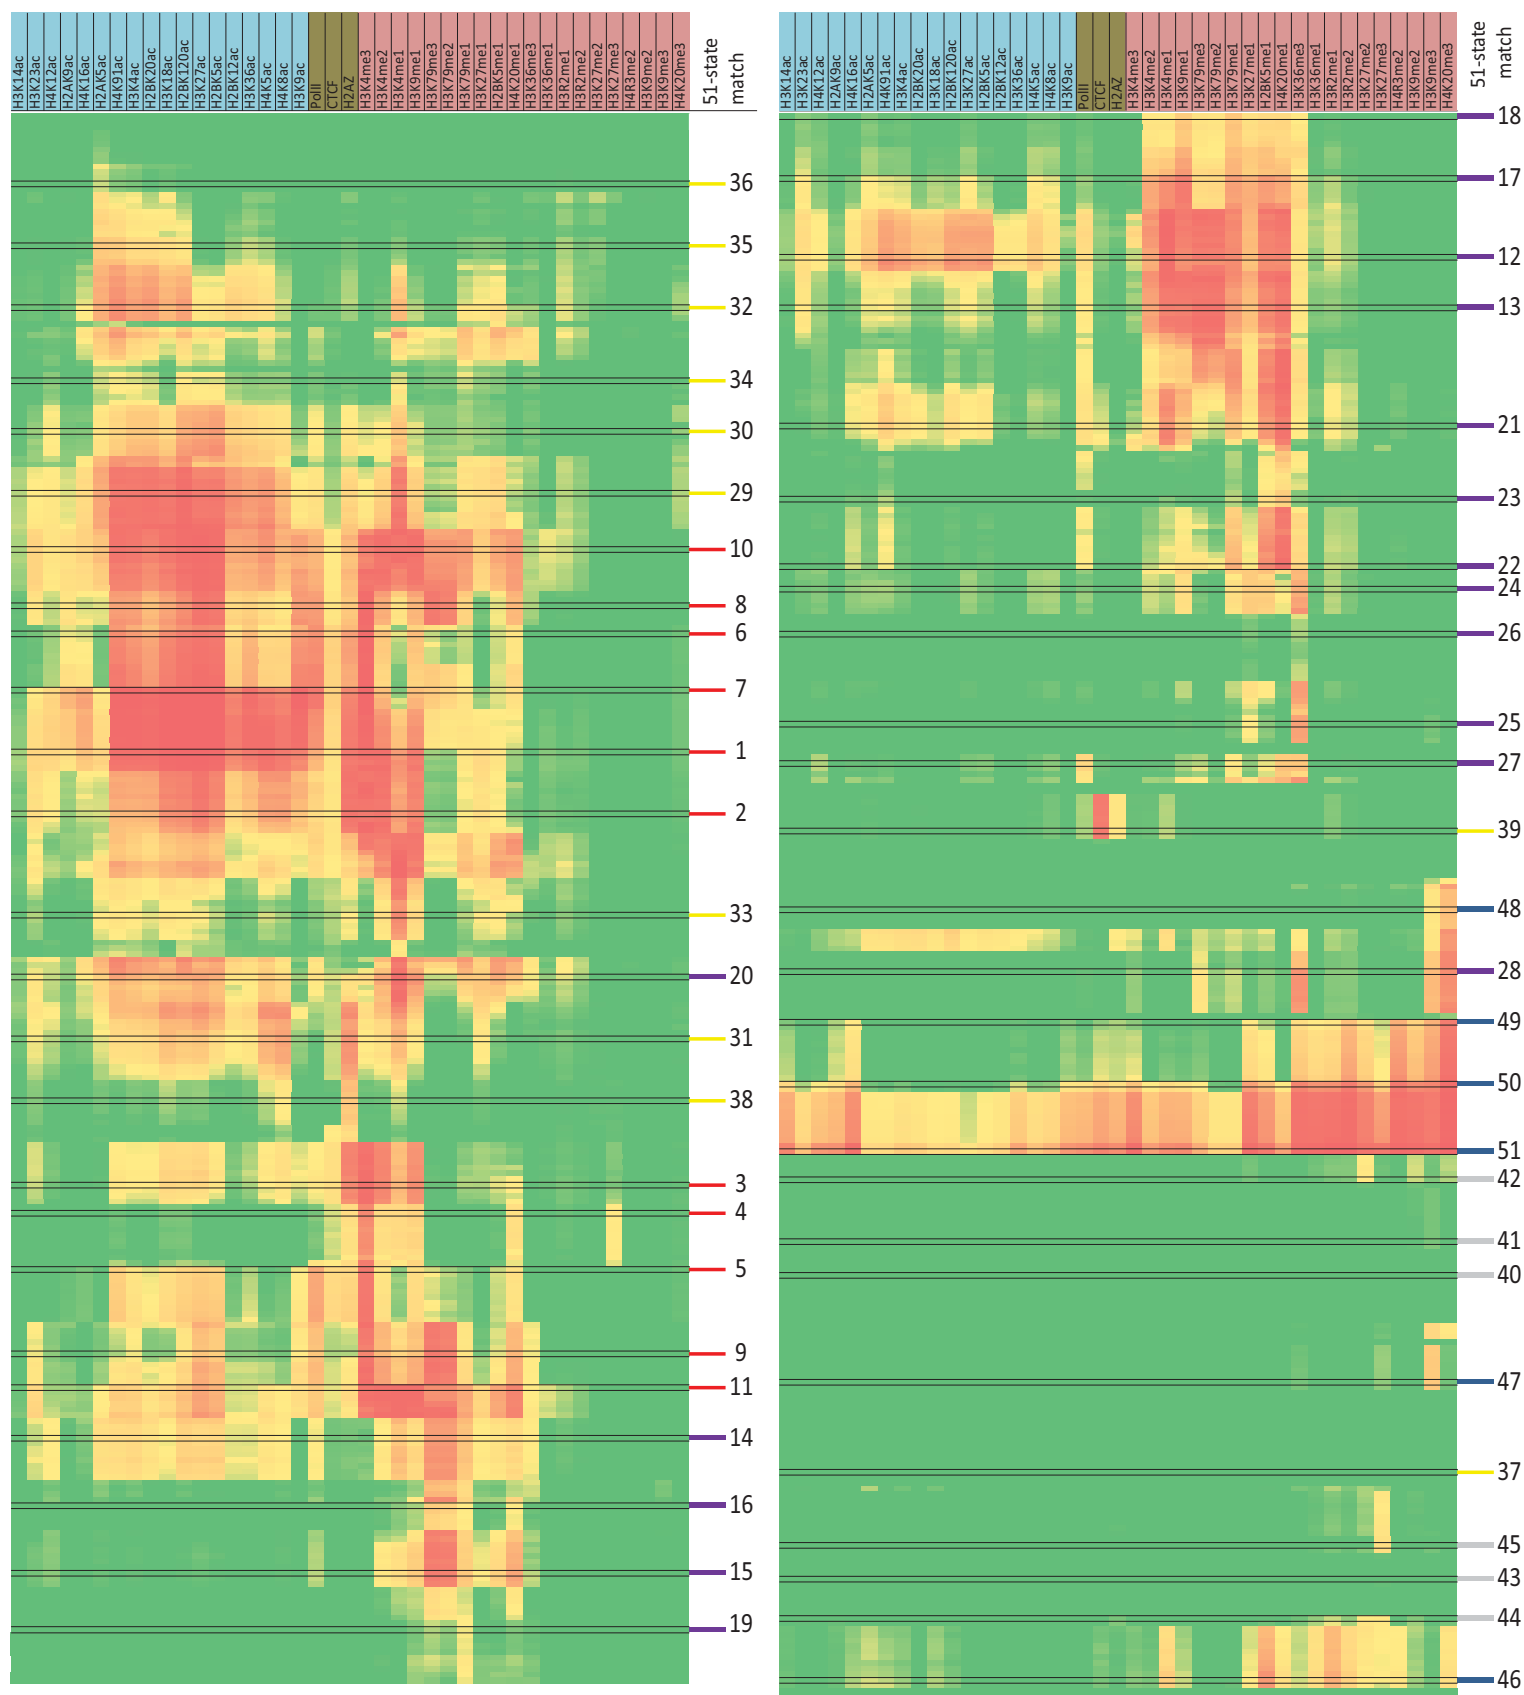

**Supplementary Figure 15: Recovery of states from 10 random-initialization 51-state models using the nested-initialization 51-state model.** Each row shows the emission parameters for all 51 states of each of 10 randomly-initialized models, clustered together with the 51 states of our nested-initialization model (boxed and labeled with their state ID). Rows are ordered using the optimal leaf ordering clustering method<sup>5</sup>, with the matrix split in two halves for display. The figure shows that the states of the model analyzed here are recovered in multiple other random initializations, and that the 51-state model has good coverage of the states found in other random initializations.

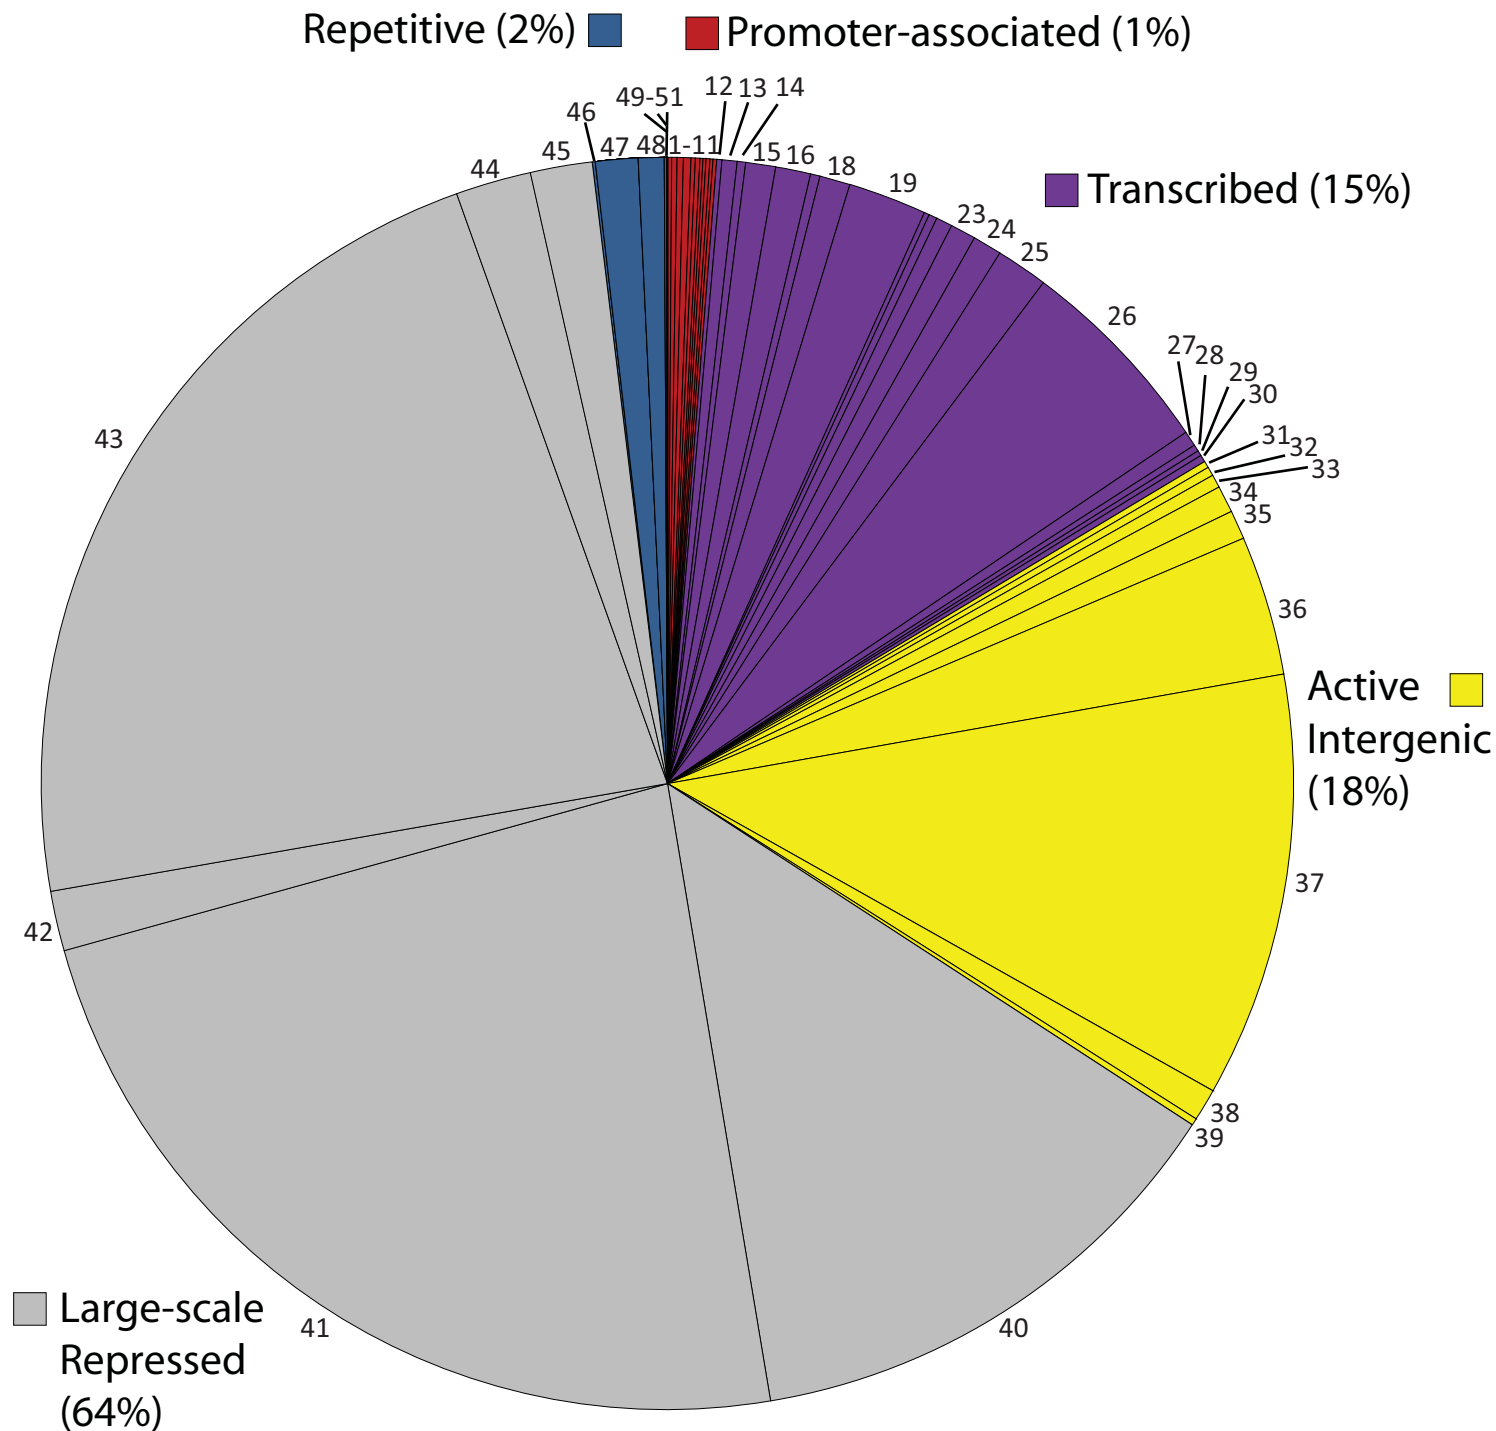

**Supplementary Figure 16: Percent genome coverage across chromatin states.** Pie chart showing the portion of the genome assigned to each chromatin state, colored by group.

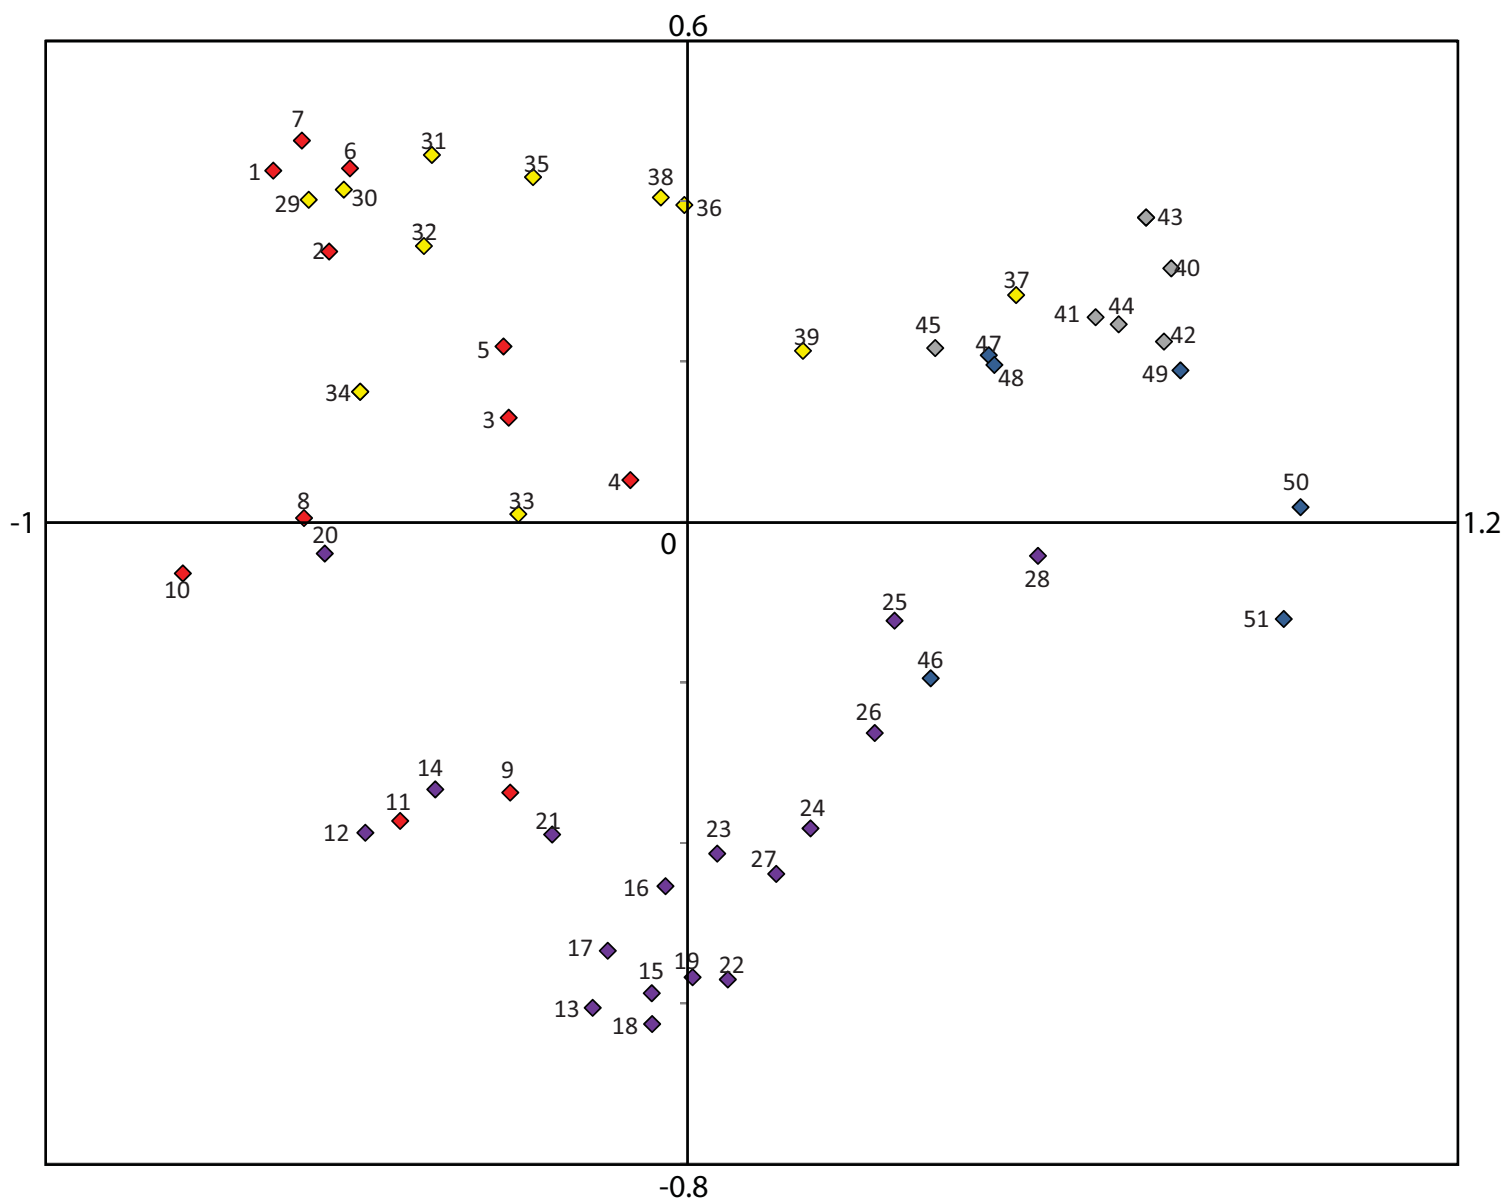

**Supplementary Figure 17: Chromatin state emission vector distances visualized using Multi-Dimensional Scaling (MDS).** Relative distances between chromatin states projected into a 2-dimensional space based on a multi-dimensional scaling (MDS) approach (implemented in the Matlab `cmdscale` function). Distances are measured as 1 minus the standard pairwise correlation coefficient between the vectors of emission parameters for each pair of chromatin states. Figure shows that the states capture largely distinct areas of the emission space, and reveal groupings that are largely consistent with the biological interpretation of the functional associations of each state.

**Supplementary Figure 18: Robustness of chromatin states to mark detection thresholds.** Each row shows the resulting frequency of each mark in each state, at varying thresholds for the Poisson distribution cut-off. For the model and state assignments inferred at the  $10^{-4}$  cutoff, we evaluate the percentage of the 200bp intervals assigned to each state that would be called ‘present’ at  $10^{-3}$ ,  $10^{-4}$ ,  $10^{-5}$ , and  $10^{-6}$  cutoffs, and computed the correlation to the emission vector for each cutoff (since the model was learned at the  $10^{-4}$  cutoff, the emission matrix is by definition the frequency with which marks are observed above the cutoff, and thus the correlation is always 1.0). The high correlation with all other cutoffs indicates that the chromatin mark combinations learned are robust at several different thresholds across three orders of magnitude in the probability cutoff. Even for states with very low emission frequencies (e.g. states 40-45), the correlation remains surprisingly high. The only exceptions are the three Alu-associated intergenic states (states 34, 36, 37), perhaps because acetylation marks that were most associated with these states were sequenced less deeply, coupled with the overall low frequency of most marks in these states making them more sensitive to such fluctuations in acetylation sequencing depth.



a.

|    | state | H3K14ac | H3K27ac | H4K12ac | H3K9ac | H4K16ac | H3K59ac | H4K9ac | H3K4ac | H3K20ac | H3K18ac | H2BK120ac | H3K27ac | H2BK59ac | H3K12ac | H3K36ac | H4K5ac | H4K8ac | H3K9ac | PoII | CTCF | H2AZ | H3K4me3 | H3K4me2 | H3K4me1 | H3K9me1 | H3K79me3 | H3K79me2 | H3K79me1 | H3K27me1 | H2BK5me1 | H4K20me1 | H3K36me3 | H3K36me1 | H3R2me1 | H3R2me2 | H3K27me2 | H3K27me3 | H4R3me2 | H3K9me2 | H3K9me3 | H4K20me3 | lgG |     |     |     |     |
|----|-------|---------|---------|---------|--------|---------|---------|--------|--------|---------|---------|-----------|---------|----------|---------|---------|--------|--------|--------|------|------|------|---------|---------|---------|---------|----------|----------|----------|----------|----------|----------|----------|----------|---------|---------|----------|----------|---------|---------|---------|----------|-----|-----|-----|-----|-----|
| 1  | 4     | 10      | 10      | 10      | 9      | 8       | 62      | 40     | 45     | 57      | 70      | 88        | 93      | 33       | 38      | 41      | 33     | 44     | 22     | 9    | 41   | 56   | 33      | 16      | 16      | 2       | 2        | 4        | 4        | 4        | 4        | 2        | 1        | 3        | 2       | 2       | 1        | 1        | 1       | 1       | 0       | 1        | 3.0 |     |     |     |     |
| 2  | 8     | 6       | 4       | 4       | 4      | 3       | 13      | 11     | 14     | 21      | 20      | 30        | 28      | 10       | 11      | 19      | 12     | 8      | 9      | 33   | 29   | 27   | 15      | 14      | 1       | 2       | 3        | 4        | 3        | 2        | 1        | 2        | 2        | 2        | 1       | 1       | 1        | 1        | 0       | 1       | 2.3     |          |     |     |     |     |     |
| 3  | 2     | 2       | 2       | 2       | 2      | 2       | 5       | 4      | 6      | 8       | 7       | 7         | 5       | 4        | 4       | 5       | 6      | 5      | 6      | 17   | 32   | 20   | 9       | 12      | 1       | 2       | 3        | 3        | 3        | 3        | 2        | 2        | 1        | 1        | 1       | 1       | 1        | 1        | 1       | 1       | 0       | 1        | 2.4 |     |     |     |     |
| 4  | 1     | 2       | 1       | 1       | 1      | 1       | 1       | 2      | 2      | 3       | 2       | 1         | 1       | 1        | 1       | 1       | 1      | 1      | 2      | 5    | 6    | 13   | 6       | 5       | 5       | 1       | 1        | 1        | 1        | 0        | 1        | 4        | 1        | 1        | 2       | 2       | 1        | 1        | 1       | 1       | 1       | 1        | 2.3 |     |     |     |     |
| 5  | 1     | 1       | 2       | 2       | 3      | 1       | 8       | 5      | 5      | 7       | 7       | 8         | 8       | 3        | 4       | 3       | 3      | 5      | 25     | 16   | 7    | 24   | 5       | 2       | 4       | 2       | 3        | 2        | 1        | 2        | 4        | 0        | 1        | 1        | 1       | 1       | 0        | 0        | 1       | 0       | 0       | 1        | 3.8 |     |     |     |     |
| 6  | 1     | 3       | 4       | 6       | 4      | 2       | 26      | 16     | 16     | 22      | 24      | 32        | 32      | 10       | 13      | 9       | 9      | 20     | 34     | 16   | 19   | 56   | 11      | 3       | 8       | 2       | 3        | 3        | 1        | 2        | 3        | 1        | 1        | 1        | 1       | 1       | 0        | 0        | 1       | 1       | 0       | 1        | 3.9 |     |     |     |     |
| 7  | 3     | 5       | 9       | 21      | 13     | 4       | 107     | 57     | 51     | 69      | 91      | 107       | 134     | 34       | 56      | 34      | 27     | 85     | 52     | 13   | 31   | 112  | 12      | 2       | 7       | 9       | 8        | 5        | 2        | 3        | 4        | 1        | 2        | 1        | 1       | 1       | 0        | 0        | 1       | 1       | 2       | 4.6      |     |     |     |     |     |
| 8  | 3     | 6       | 5       | 7       | 4      | 3       | 197     | 14     | 12     | 15      | 18      | 32        | 30      | 10       | 9       | 7       | 6      | 20     | 31     | 7    | 9    | 60   | 16      | 4       | 8       | 29      | 27       | 7        | 2        | 3        | 10       | 2        | 2        | 1        | 1       | 0       | 0        | 1        | 0       | 1       | 0       | 1        | 3.2 |     |     |     |     |
| 9  | 4     | 5       | 2       | 2       | 2      | 3       | 2       | 3      | 4      | 3       | 15      | 8         | 3       | 8        | 3       | 15      | 8      | 3      | 13     | 31   | 20   | 18   | 5       | 4       | 2       | 3       | 10       | 2        | 2        | 7        | 3        | 31       | 3        | 10       | 1       | 1       | 1        | 1        | 1       | 1       | 1       | 2.7      |     |     |     |     |     |
| 10 | 4     | 7       | 10      | 7       | 10     | 7       | 10      | 41     | 29     | 29      | 33      | 39        | 50      | 51       | 20      | 17      | 20     | 14     | 22     | 18   | 6    | 13   | 41      | 32      | 32      | 19      | 22       | 23       | 14       | 5        | 13       | 17       | 2        | 3        | 3       | 2       | 1        | 1        | 1       | 1       | 1       | 1        | 2.7 |     |     |     |     |
| 11 | 3     | 9       | 4       | 4       | 3      | 4       | 9       | 8      | 7      | 8       | 10      | 16        | 13      | 5        | 5       | 7       | 5      | 8      | 12     | 5    | 6    | 24   | 28      | 28      | 18      | 29      | 29       | 12       | 5        | 14       | 25       | 2        | 3        | 2        | 2       | 1       | 1        | 1        | 1       | 1       | 0       | 1        | 2.2 |     |     |     |     |
| 12 | 4     | 8       | 6       | 3       | 5      | 9       | 17      | 12     | 12     | 11      | 14      | 14        | 15      | 7        | 6       | 10      | 7      | 3      | 7      | 3    | 1    | 2    | 14      | 32      | 15      | 32      | 32       | 17       | 7        | 21       | 27       | 3        | 3        | 3        | 2       | 1       | 2        | 1        | 0       | 1       | 1       | 1        | 1.7 |     |     |     |     |
| 13 | 3     | 6       | 4       | 2       | 3      | 4       | 4       | 4      | 3      | 3       | 4       | 4         | 3       | 2        | 2       | 4       | 4      | 2      | 5      | 2    | 0    | 2    | 12      | 18      | 14      | 33      | 32       | 34       | 14       | 6        | 19       | 26       | 3        | 3        | 2       | 2       | 1        | 1        | 2       | 1       | 0       | 1        | 1   | 1.4 |     |     |     |
| 14 | 2     | 4       | 5       | 2       | 3      | 6       | 6       | 6      | 7      | 5       | 7       | 6         | 7       | 5        | 4       | 6       | 5      | 2      | 4      | 2    | 1    | 1    | 4       | 7       | 4       | 15      | 17       | 9        | 3        | 4        | 5        | 2        | 1        | 2        | 1       | 1       | 1        | 1        | 1       | 1       | 0       | 1        | 1   | 1.4 |     |     |     |
| 15 | 2     | 3       | 4       | 1       | 2      | 2       | 1       | 2      | 2      | 1       | 2       | 2         | 2       | 2        | 2       | 2       | 2      | 1      | 4      | 1    | 0    | 1    | 5       | 4       | 4       | 6       | 22       | 15       | 9        | 3        | 6        | 11       | 2        | 1        | 1       | 1       | 1        | 0        | 1       | 1       | 1       | 0        | 1   | 1.2 |     |     |     |
| 16 | 1     | 1       | 1       | 1       | 1      | 1       | 1       | 1      | 1      | 1       | 1       | 1         | 1       | 1        | 1       | 1       | 1      | 1      | 1      | 1    | 0    | 0    | 2       | 2       | 2       | 7       | 2        | 3        | 4        | 2        | 3        | 3        | 1        | 2        | 1       | 1       | 0        | 0        | 1       | 0       | 1       | 1        | 1.0 |     |     |     |     |
| 17 | 3     | 6       | 4       | 2       | 3      | 4       | 4       | 3      | 3      | 3       | 3       | 4         | 3       | 2        | 2       | 5       | 4      | 2      | 3      | 1    | 1    | 1    | 11      | 13      | 13      | 6       | 8        | 13       | 7        | 13       | 11       | 4        | 3        | 3        | 2       | 1       | 1        | 2        | 1       | 0       | 1       | 1        | 1.3 |     |     |     |     |
| 18 | 2     | 3       | 3       | 1       | 2      | 2       | 2       | 2      | 2      | 1       | 1       | 2         | 1       | 1        | 2       | 3       | 3      | 1      | 2      | 1    | 0    | 1    | 4       | 3       | 5       | 4       | 5        | 4        | 5        | 4        | 5        | 5        | 3        | 2        | 2       | 1       | 1        | 1        | 1       | 1       | 0       | 0        | 1   | 1.2 |     |     |     |
| 19 | 1     | 1       | 2       | 1       | 1      | 1       | 1       | 1      | 1      | 1       | 1       | 1         | 1       | 1        | 1       | 1       | 1      | 1      | 1      | 1    | 0    | 0    | 2       | 2       | 1       | 2       | 2        | 3        | 4        | 2        | 1        | 2        | 1        | 1        | 1       | 1       | 1        | 0        | 1       | 1       | 0       | 1        | 1.0 |     |     |     |     |
| 20 | 4     | 6       | 5       | 3       | 5      | 8       | 16      | 12     | 13     | 14      | 14      | 15        | 14      | 8        | 7       | 10      | 8      | 4      | 7      | 6    | 5    | 5    | 13      | 30      | 11      | 3       | 4        | 8        | 5        | 11       | 9        | 2        | 3        | 3        | 2       | 1       | 1        | 2        | 1       | 1       | 1       | 0        | 1   | 1   | 1.9 |     |     |
| 21 | 2     | 2       | 3       | 2       | 4      | 4       | 9       | 5      | 6      | 4       | 6       | 4         | 5       | 3        | 2       | 4       | 3      | 2      | 7      | 8    | 1    | 2    | 6       | 14      | 6       | 3       | 4        | 9        | 3        | 16       | 26       | 2        | 2        | 3        | 2       | 1       | 1        | 2        | 0       | 0       | 1       | 1        | 0   | 1   | 1.7 |     |     |
| 22 | 1     | 3       | 2       | 1       | 2      | 2       | 2       | 2      | 1      | 2       | 2       | 2         | 1       | 1        | 1       | 1       | 1      | 1      | 1      | 1    | 0    | 1    | 3       | 4       | 4       | 4       | 13       | 3        | 16       | 26       | 4        | 4        | 2        | 3        | 4       | 1       | 0        | 2        | 1       | 0       | 1       | 1        | 1   | 1.7 |     |     |     |
| 23 | 1     | 1       | 1       | 1       | 2      | 2       | 3       | 2      | 2      | 1       | 1       | 1         | 1       | 1        | 1       | 1       | 1      | 1      | 2      | 1    | 0    | 1    | 2       | 2       | 2       | 1       | 1        | 3        | 2        | 2        | 1        | 1        | 2        | 2        | 1       | 1       | 1        | 1        | 1       | 1       | 1       | 0        | 1   | 1   | 1.3 |     |     |
| 24 | 2     | 2       | 3       | 1       | 3      | 2       | 2       | 2      | 2      | 1       | 1       | 2         | 2       | 1        | 2       | 3       | 3      | 1      | 2      | 1    | 0    | 1    | 3       | 2       | 4       | 1       | 1        | 5        | 5        | 5        | 3        | 7        | 2        | 2        | 2       | 2       | 1        | 1        | 2       | 1       | 0       | 1        | 1   | 1   | 1.3 |     |     |
| 25 | 1     | 1       | 2       | 1       | 2      | 1       | 1       | 1      | 1      | 1       | 1       | 1         | 1       | 1        | 1       | 2       | 2      | 1      | 2      | 1    | 0    | 1    | 1       | 1       | 2       | 1       | 1        | 1        | 2        | 3        | 2        | 1        | 8        | 1        | 2       | 1       | 1        | 1        | 1       | 1       | 1       | 1        | 1   | 1.2 |     |     |     |
| 26 | 1     | 1       | 2       | 1       | 1      | 1       | 1       | 1      | 1      | 1       | 1       | 1         | 1       | 1        | 1       | 1       | 1      | 1      | 1      | 1    | 0    | 0    | 1       | 1       | 1       | 1       | 1        | 1        | 2        | 2        | 1        | 1        | 2        | 1        | 1       | 1       | 1        | 0        | 1       | 0       | 1       | 1        | 1   | 1.0 |     |     |     |
| 27 | 1     | 1       | 4       | 1       | 2      | 2       | 2       | 2      | 1      | 1       | 1       | 0         | 2       | 2        | 1       | 1       | 2      | 3      | 1      | 8    | 2    | 0    | 1       | 2       | 1       | 2       | 2        | 2        | 4        | 2        | 3        | 7        | 5        | 1        | 1       | 1       | 1        | 1        | 1       | 0       | 0       | 1        | 0   | 0   | 1.3 |     |     |
| 28 | 1     | 0       | 1       | 1       | 1      | 1       | 0       | 0      | 1      | 1       | 0       | 0         | 0       | 1        | 1       | 1       | 1      | 1      | 1      | 1    | 0    | 0    | 2       | 1       | 1       | 1       | 4        | 2        | 3        | 5        | 1        | 1        | 1        | 17       | 1       | 2       | 3        | 2        | 1       | 1       | 1       | 1        | 1   | 1   | 1.5 |     |     |
| 29 | 4     | 5       | 7       | 5       | 6      | 14      | 37      | 26     | 33     | 28      | 36      | 31        | 35      | 25       | 17      | 20      | 13     | 6      | 6      | 3    | 7    | 3    | 7       | 23      | 6       | 3       | 7        | 2        | 3        | 4        | 5        | 2        | 1        | 2        | 3       | 2       | 1        | 1        | 2       | 1       | 0       | 1        | 1   | 1   | 1.9 |     |     |
| 30 | 3     | 4       | 5       | 3       | 3      | 5       | 8       | 9      | 11     | 9       | 13      | 15        | 16      | 11       | 8       | 8       | 7      | 4      | 5      | 3    | 4    | 2    | 4       | 7       | 7       | 3       | 2        | 2        | 3        | 2        | 2        | 1        | 1        | 1        | 2       | 2       | 1        | 1        | 1       | 1       | 1       | 1        | 1   | 1   | 1   | 1.5 |     |
| 31 | 3     | 5       | 4       | 2       | 3      | 4       | 6       | 6      | 8      | 11      | 9       | 10        | 7       | 6        | 6       | 13      | 15     | 4      | 2      | 7    | 16   | 3    | 5       | 8       | 4       | 1       | 1        | 2        | 3        | 2        | 1        | 1        | 2        | 2        | 1       | 2       | 1        | 1        | 1       | 1       | 0       | 1        | 1   | 1   | 1.5 |     |     |
| 32 | 3     | 3       | 3       | 3       | 4      | 12      | 20      | 13     | 17     | 12      | 14      | 5         | 6       | 10       | 7       | 7       | 4      | 2      | 2      | 2    | 2    | 1    | 3       | 3       | 8       | 3       | 1        | 2        | 4        | 3        | 4        | 2        | 2        | 2        | 3       | 2       | 2        | 1        | 2       | 1       | 1       | 0        | 2   | 1   | 1   | 1.5 |     |
| 33 | 3     | 4       | 3       | 2       | 2      | 4       | 5       | 4      | 5      | 6       | 5       | 4         | 3       | 3        | 3       | 5       | 4      | 2      | 2      | 5    | 3    | 2    | 5       | 13      | 5       | 1       | 1        | 3        | 3        | 3        | 2        | 1        | 1        | 1        | 1       | 1       | 1        | 1        | 1       | 1       | 1       | 1        | 0   | 1   | 1   | 1.5 |     |
| 34 | 2     | 2       | 3       | 1       | 2      | 3       | 4       | 3      | 4      | 3       | 4       | 3         | 3       | 3        | 3       | 3       | 3      | 1      | 2      | 1    | 1    | 1    | 2       | 3       | 2       | 1       | 1        | 2        | 3        | 2        | 2        | 1        | 1        | 1        | 1       | 1       | 1        | 1        | 1       | 1       | 1       | 1        | 1   | 1   | 1.2 |     |     |
| 35 | 2     | 2       | 2       | 2       | 2      | 8       | 8       | 6      | 7      | 6       | 2       | 7         | 6       | 4        | 4       | 2       | 7      | 1      | 1      | 1    | 1    | 1    | 1       | 1       | 1       | 1       | 1        | 1        | 2        | 2        | 2        | 2        | 1        | 1        | 2       | 2       | 1        | 1        | 1       | 1       | 1       | 1        | 1   | 1   | 1   | 1.3 |     |
| 36 | 1     | 1       | 1       | 1       | 1      | 3       | 2       | 2      | 2      | 2       | 2       | 1         | 1       | 2        | 2       | 2       | 1      | 1      | 1      | 1    | 1    | 1    | 1       | 1       | 1       | 1       | 0        | 1        | 1        | 1        | 1        | 1        | 1        | 1        | 1       | 1       | 1        | 1        | 1       | 1       | 1       | 1        | 1   | 1   | 1   | 1.1 |     |
| 37 | 1     | 1       | 1       | 1       | 1      | 1       | 1       | 1      | 1      | 1       | 1       | 0         | 0       | 1        | 1       | 1       | 1      | 1      | 1      | 1    | 1    | 0    | 1       | 1       | 1       | 1       | 0        | 1        | 1        | 1        | 1        | 1        | 0        | 1        | 1       | 1       | 1        | 1        | 1       | 1       | 1       | 1        | 1   | 1   | 1   | 1.0 |     |
| 38 | 2     | 3       | 2       | 1       | 1      | 2       | 1       | 2      | 2      | 3       | 2       | 2         | 1       | 2        | 2       | 3       | 4      | 1      | 1      | 1    | 7    | 1    | 2       | 2       | 2       | 0       | 0        | 0        | 1        | 1        | 1        | 0        | 0        | 1        | 1       | 1       | 1        | 1        | 1       | 1       | 1       | 1        | 1   | 1   | 1   | 1   | 1.2 |
| 39 | 1     | 1       | 2       | 1       | 1      | 2       | 2       | 1      | 1      | 2       | 2       | 1         | 1       | 1        | 2       | 2       | 2      | 2      | 1      | 3    | 66   | 4    | 1       | 2       | 2       | 1       | 0        | 1        | 1        | 1        | 1        | 1        | 1        | 1        | 1       | 1       | 1        | 1        | 1       | 1       | 1       | 1        | 1   | 1   | 1   | 1   | 1.2 |
| 40 | 0     | 0       | 0       | 0       | 0      | 0       | 0       | 0      | 0      | 0       | 0       | 0         | 0       | 0        | 0       | 0       | 0      | 0      | 0      | 0    | 0    | 0    | 0       | 0       | 0       | 0       | 0        | 0        | 0        | 0        | 0        | 0        | 0        | 0        | 0       | 0       | 0        | 0        | 0       | 0       | 0       | 0        | 0   | 0   | 0   | 0.2 |     |
| 41 | 0     | 1       | 1       | 1       | 1      | 1       | 0       | 0      | 0      | 0       | 0       | 0         | 0       | 0        | 0       | 0       | 0      | 0      | 1      | 1    | 1    | 1    | 0       | 0       | 0       | 0       | 0        | 0        | 0        | 0        | 0        | 0        | 0        | 0        | 0       | 0       | 0        | 0        | 0       | 0       | 0       | 0        | 0   | 0   | 0   | 1.1 |     |
| 42 | 1     | 1       | 1       | 1       | 1      | 1       | 0       | 0      | 0      | 0       | 0       | 0         | 0       | 0        | 0       | 0       | 0      | 0      | 1      | 1    | 1    | 1    | 0       | 0       | 0       | 0       | 0        | 0        | 0        | 0        | 0        | 0        | 0        | 0        | 1       | 1       | 1        | 1        | 1       | 1       | 1       | 1        | 1   | 1   | 1   | 1   | 1.1 |
| 43 |       |         |         |         |        |         |         |        |        |         |         |           |         |          |         |         |        |        |        |      |      |      |         |         |         |         |          |          |          |          |          |          |          |          |         |         |          |          |         |         |         |          |     |     |     |     |     |

b.

b.

state

H3K14ac

H3K23ac

H4K12ac

H2AK9ac

H4K16ac

H2AK5ac

H4K91ac

H3K4ac

H2BK20ac

H3K18ac

H2BK120ac

H3K27ac

H2BK5ac

H2BK12ac

H3K36ac

H4K5ac

H4K8ac

H3K9ac

PoII

CTCF

H2AZ

H3K4me3

H3K4me2

H3K4me1

H3K9me1

H3K79me3

H3K79me2

H3K79me1

H2BK5me1

H4K20me1

H3K36me3

H3K36me1

H3K2me1

H3K2me2

H3K27me3

H4K3me2

H3K9me2

H3K9me3

H4K20me3

logG

1

1

3

3

3

3

20

13

15

19

23

29

31

11

12

13

11

14

7

3

13

18

11

5

5

1

1

1

1

1

0

1

1

1

0

1

1

1

0

0

0

0

3.0

2

2

3

3

2

2

6

5

6

9

9

13

10

4

5

8

8

5

3

4

14

12

12

7

6

1

1

2

1

1

0

1

2

1

1

0

1

1

1

0

1

0

1

2.3

3

1

2

1

1

1

2

2

2

4

3

3

2

2

2

2

3

2

2

7

9

11

8

4

5

1

1

1

1

1

0

1

1

1

1

1

1

0

1

1

1

0

0

1

2.4

4

1

0

1

1

1

0

1

1

1

1

2

2

1

1

1

1

1

1

1

2

2

6

3

2

2

0

0

1

1

2

0

1

1

1

1

0

0

0

0

0

1

2.3

5

0

0

1

1

1

2

1

1

2

2

2

2

1

1

1

1

1

1

7

4

1

1

1

1

2

1

1

1

0

1

1

1

1

0

0

0

0

0

0

0

0

3.8

6

0

1

1

1

1

0

7

4

4

6

6

8

8

2

3

2

2

5

9

4

14

3

1

2

1

1

1

1

0

1

0

1

1

1

0

0

0

0

0

0

0

0

3.9

7

1

1

2

5

3

1

23

13

11

15

20

23

29

7

12

7

6

19

11

3

7

24

3

1

2

2

2

1

0

1

1

1

0

0

0

0

0

0

0

0

0

0

4.6

8

1

2

1

2

1

1

6

4

4

5

6

10

9

3

3

2

2

6

10

2

3

19

5

1

3

9

8

2

1

1

3

0

1

1

0

0

0

0

0

0

0

3.2

9

1

2

2

1

1

1

1

2

2

2

3

5

4

2

2

1

1

3

7

2

1

10

5

3

3

15

15

3

1

1

5

1

1

1

1

0

0

0

0

0

0

2.0

10

2

4

3

4

3

4

15

11

11

12

15

19

19

8

6

8

5

8

7

2

5

16

12

7

8

9

5

2

5

7

1

1

1

1

0

1

0

1

0

0

0

0

2.7

11

1

4

2

2

1

2

4

4

3

4

5

7

6

2

2

3

2

4

6

2

3

11

13

8

13

13

6

2

6

11

1

2

1

1

0

1

0

1

0

0

0

0

2.2

12

2

5

4

2

3

5

10

7

7

6

8

8

9

4

3

6

4

2

4

2

1

1

8

19

9

19

19

10

4

12

16

2

2

2

1

1

0

1

0

1

0

1

1.7

13

2

4

3

1

2

3

3

2

2

2

3

2

1

2

3

2

1

4

1

0

1

1

8

13

10

23

24

10

4

13

18

2

2

2

1

1

1

1

0

1

1

0

1

1.4

14

1

2

3

1

2

4

5

5

5

5

3

4

5

4

3

3

3

1

0

1

3

5

5

11

11

7

2

3

3

4

2

1

1

1

1

1

1

0

1

1

0

1

12

15

1

2

3

1

1

2

1

1

1

1

1

1

1

1

1

2

2

1

3

1

0

1

4

4

5

18

19

7

2

5

9

1

1

1

1

1

0

1

1

0

1

1.0

16

1

1

2

1

1

1

1

1

1

1

1

1

1

1

1

1

1

2

1

0

1

2

2

2

2

7

8

4

2

2

3

1

1

1

1

0

1

1

0

1

1.0

17

2

4

3

1

2

3

3

2

2

2

2

3

2

1

2

4

3

1

2

1

1

8

10

9

4

6

10

5

10

8

3

2

2

1

1

0

1

1

0

1

1

1.3

18

2

2

3

1

2

2

1

1

1

1

1

1

1

1

1

2

2

1

2

1

0

1

3

3

4

4

4

7

3

4

4

2

1

1

1

1

0

1

1

0

1.2

19

1

1

2

1

1

1

1

1

1

1

1

1

1

1

1

2

1

1

1

0

1

2

1

2

2

3

4

2

1

2

1

1

1

1

0

1

1

0

1

1.0

20

2

3

3

2

2

4

9

6

7

7

8

8

4

3

6

4

2

4

3

3

2

7

16

6

1

2

4

3

6

5

1

2

2

1

1

0

1

1

0

1

0

1

1.9

21

1

1

2

1

2

3

5

3

3

2

4

2

3

2

1

2

2

1

4

5

0

1

3

8

4

2

2

5

2

9

15

1

1

2

1

0

0

1

0

1

1.7

22

1

1

2

1

2

3

1

1

1

1

1

1

1

1

1

1

1

3

1

0

0

2

2

3

3

3

7

2

10

17

3

1

2

2

1

1

0

1

0

1

1.5

23

1

1

1

1

2

2

1

1

1

1

1

1

1

1

1

1

1

2

1

0

0

2

2

2

1

1

3

4

6

1

1

1

1

1

0

1

0

1

1

1.3

24

1

2

2

1

2

2

2

1

1

1

2

1

1

2

1

1

1

1

1

1

0

1

2

3

2

1

1

4

4

2

2

5

1

2

1

1

1

0

1

1

1.3

25

1

1

2

1

2

1

1

1

1

1

1

1

1

1

1

2

1

1

1

0

1

1

1

1

1

1

2

3

2

1

7

1

1

1

1

1

1

1

1

1

1.2

26

1

1

2

1

1

1

1

1

1

1

1

1

1

1

1

1

1

1

1

0

0

1

1

1

1

1

2

2

1

1

2

1

1

1

1

0

1

1

0

1.0

27

1

1

3

1

2

1

1

1

1

1

1

1

2

1

1

2

2

1

6

1

0

0

1

1

2

2

1

3

2

2

5

4

1

1

1

0

0

1

0

0

1.3

28

1

0

1

1

1

1

0

0

0

1

0

0

0

1

1

0

1

1

1

1

0

2

1

1

1

3

2

2

1

1

1

15

1

2

2

1

0

1

1

8

44

1.2

29

2

3

4

3

3

8

20

14

18

15

19

16

19

14

9

11

7

3

3

2

4

1

4

12

3

1

1

3

2

3

1

1

1

1

1

1

1

1

1

0

1

0

1

1.9

30

2

2

4

2

2

3

5

6

7

6

8

10

11

7

5

5

2

3

2

3

1

3

5

2

1

1

2

1

1

1

1

1

1

1

1

0

1

1

0

1

1

1.5

31

2

3

3

2

2

2

4

4

5

7

6

6

4

4

4

9

10

2

1

4

10

2

4

5

2

0

1

1

2

1

1

1

1

1

1

1

1

1

1

0

1

1.5

32

2

2

2

2

3

8

13

9

12

8

9

3

4

7

5

5

3

1

1

1

1

1

2

6

2

1

1

3

6

2

1

1

2

3

1

1

2

1

1

1

0

1

1.5

33

2

2

1

2

3

3

4

3

3

4

3

2

2

3

2

3

2

3

2

3

2

3

8

3

2

1

1

2

2

1

1

2

2

1

1

1

1

1

1

1

0

1

1.5

34

1

2

2

1

2

3

3

3

3

2

3

2

3

3

2

3

2

1

2

1

1

1

2

1

1

1

1

2

2

1

1

1

1

1

1

1

1

0

1

1.2

35

2

2

1

1

2

6

6

5

6

5

4

1

3

3

3

3

2

1

1

1

1

1

1

1

1

1

1

1

1

1

1

1

1

2

1

1

1

1

1

1

0

1

1.3

36

1

1

1

1

1

3

2

2

2

2

1

1

1

2

2

1

1

1

1

1

0

1

1

1

0

0

1

1

1

1

1

1

1

1

1

1

1

1

1

0

1

1.1

37

1

1

1

1

1

1

1

1

1

1

1

0

0

1

1

1

1

1

1

1

1

1

1

1

0

0

1

1

1

1

0

1

1

1

1

1

1

1

1

0

1

1.1

38

2

2

2

1

1

2

1

2

2

2

2

1

2

2

3

4

1

1

6

1

2

2

1

2

1

0

0

1

1

1

1

1

1

1

1

1

1

1

1

1

1

1

1.2

**Supplementary Figure 20: Sequence tag enrichments relative to genome average, and relative to input control. a. Sequence tag enrichments relative to genome average.** Table shows the fold enrichment for the sequence tag counts of each mark (top) in each state (left) relative to the genome average for that mark (column). Rightmost column shows the same tag enrichments for IgG control<sup>6</sup>, showing that repetitive states 49-51 are likely due to sequencing biases (discussed below and in the text). The bottom row shows the correlation of the mark tag enrichment with the emission parameter columns for the remaining states 1-48. **b. Sequence tag enrichments relative to IgG input control.** Table shows the fold enrichment for the number of sequence tags for each mark (top) in each state (left) relative to the IgG control sequence tag enrichments in that state from panel **a** (also repeated in the rightmost column). All marks showed correlations above 0.85 except a set of nine marks (H4K12ac, H4K16ac, H3K14ac, H4R3me2, H3K36me1, H3K9me2, H3K27me2, H3R2me2, H3K23ac). These nine marks generally appear to have been less informative in our state definitions, and may correspond to either lower quality antibodies, or to less biologically informative chromatin modifications. This table shows that even though we did not seek to explicitly model tag enrichments associated with different chromatin states, such differences are captured by the model. The table also shows that repeat-associated states 49-51 had the highest enrichment for the IgG control (9.2-fold, 23.7-fold, and 67-fold), while only a subset of the high-emission marks were actually enriched relative to the IgG control for these states, suggesting that many of the sequence tags mapping to location in these states are likely from highly-repetitive genomic sequences underrepresented in the reference genome. Lastly, this table suggests that the joint modeling of marks in chromatin states may enable detection of lower informative marks in the context of all other marks and their genomic locations.

a.

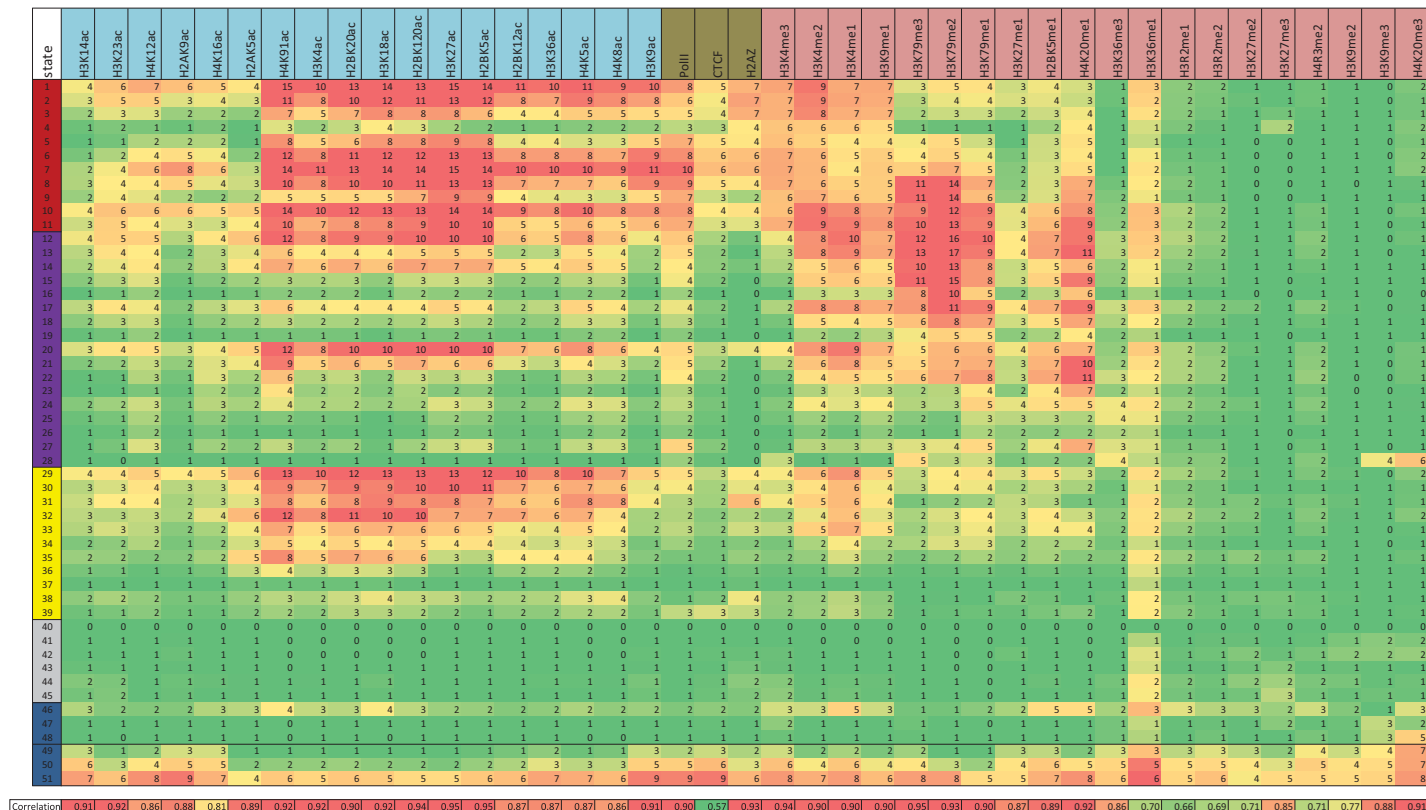

b.

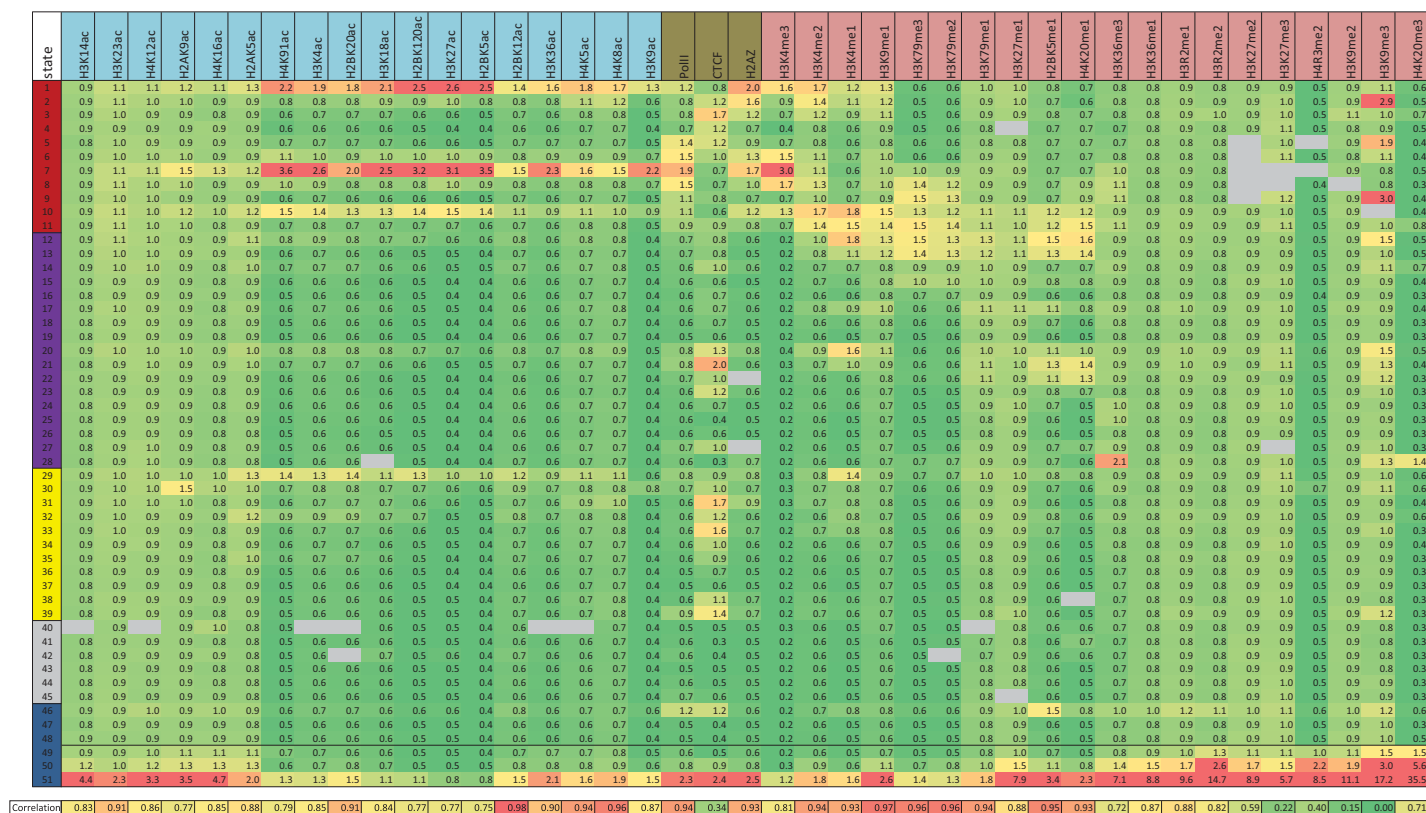

**Supplementary Figure 21: Chromatin states capture tag intensities outside binary cutoffs.** Sequence tag enrichments for intervals above and below detection threshold demonstrate that chromatin states capture additional information about signal intensity beyond the simple presence/absence information encoded in the binary cutoffs. **a. Below cutoff.** Fold enrichment for the sequence tag counts of each mark (top) in each state (left) relative to the genome average for that mark (column), for all intervals where the mark is 'absent' (i.e. number of sequence tags for that mark is below the 'presence' threshold for that mark). The bottom row shows high correlation between the emission parameters of a given mark across states and the tag frequency levels for that mark in 'absent' regions, even though when learning the model no information on the below threshold signal levels was given. **b. Above cutoff.** Same figure as top panel for intervals where the mark was 'present' (at or above the 'presence' threshold for that mark). Cells corresponding to states with zero posterior probability for observing the mark are colored gray. Again we find positive correlations between the tag tag enrichments and the emission parameters even though no information on the exact signal level above threshold was given to the model. The high correlations for both above-threshold and below-threshold intervals suggest that chromatin states with high emission probability for a given mark are more likely to have more tags for that mark, both below and above the threshold, compared to states that have lower emission probability for that mark.

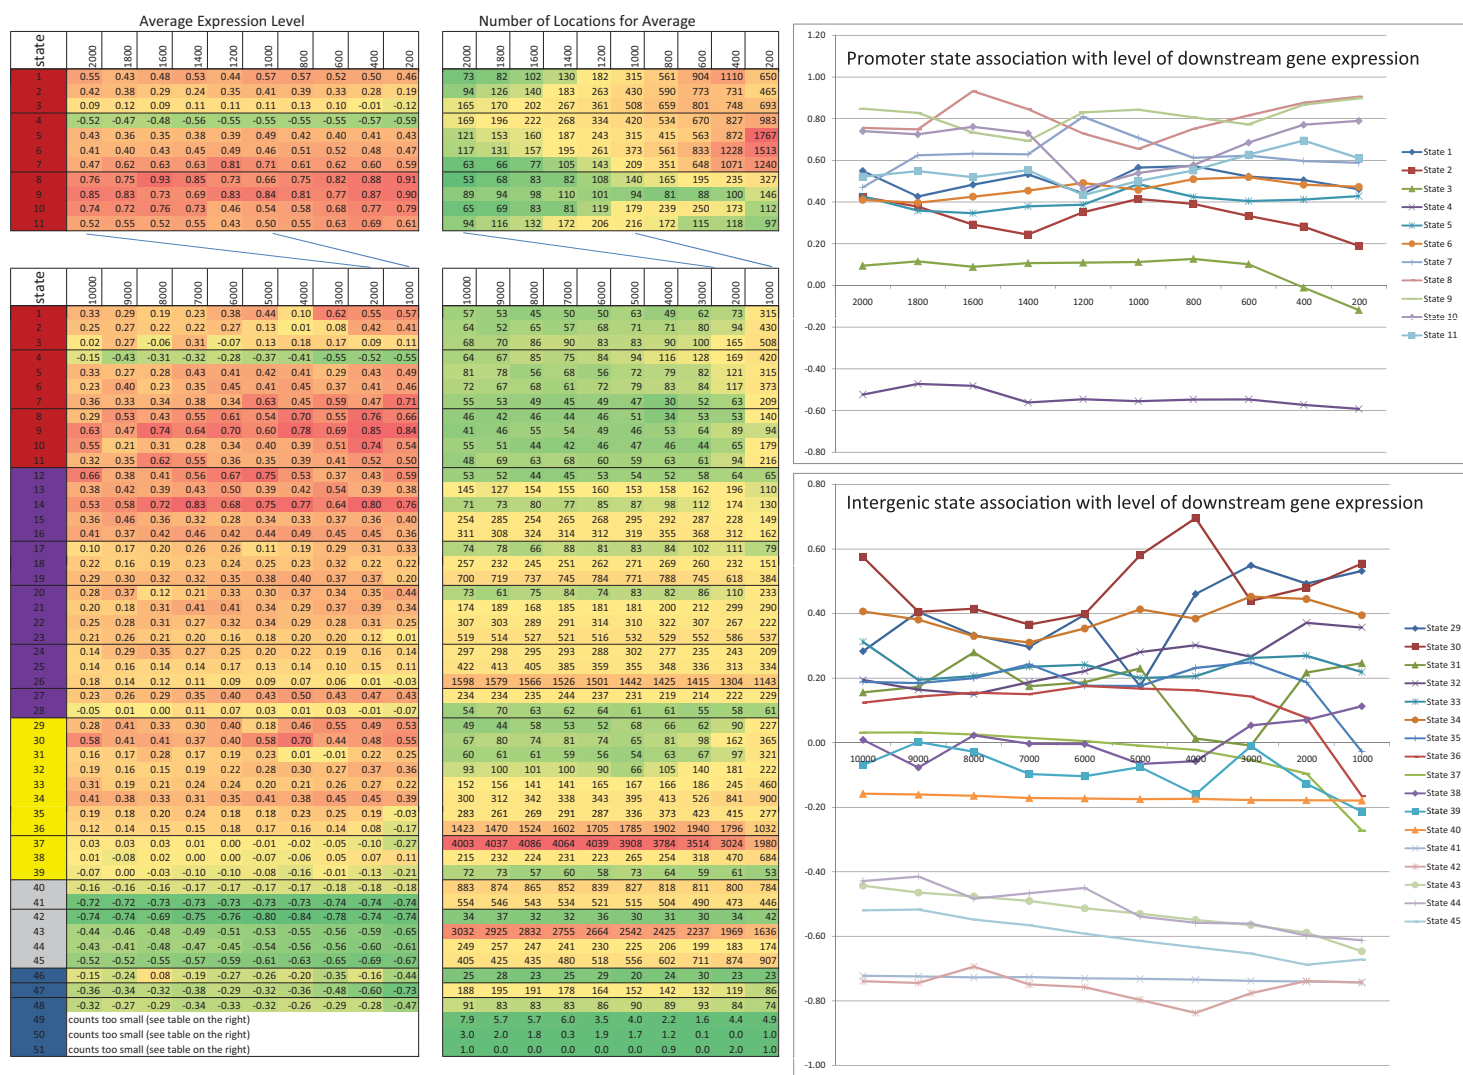

a. Regulatory motif enrichment / depletion

b. Transcription factor binding enrichment / depletion

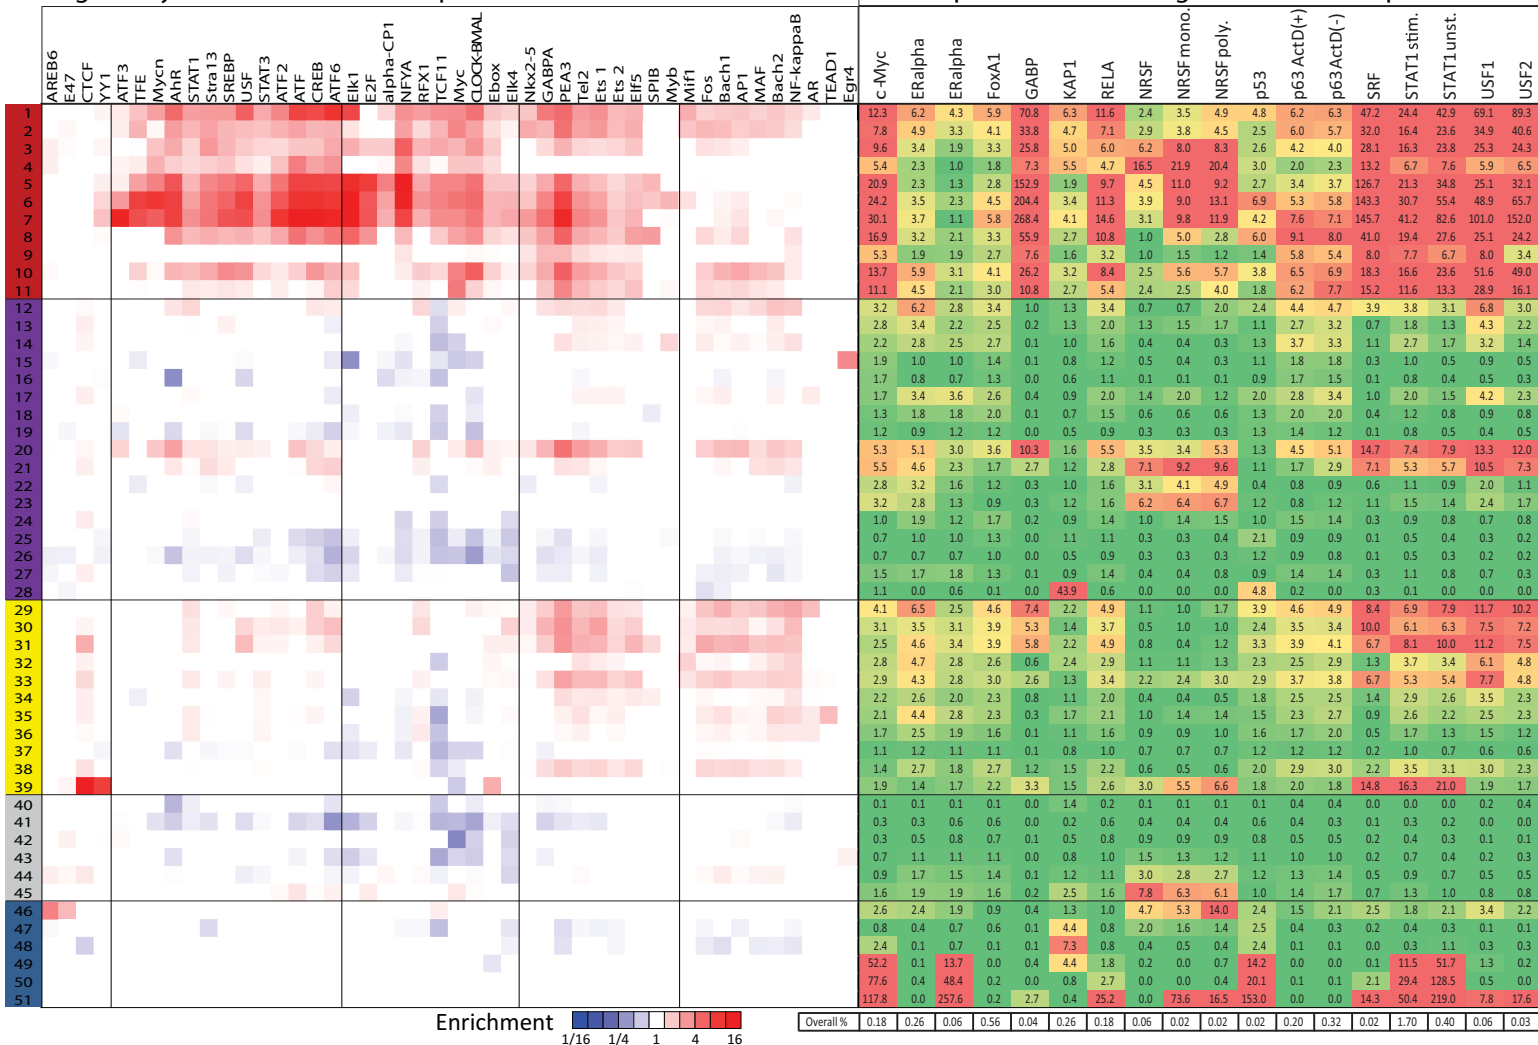

**Supplementary Figure 23: Transcription factor binding and motif enrichments.**

**a. Heatmap showing significant regulatory motif enrichments (red) and depletions (blue) for several transcription factors in both promoter and candidate enhancer states.** Vertical black lines distinguish several groups emerging from two-dimensional clustering based on their relative enrichment in promoter states vs. active intergenic states. From left to right, these are: enriched primarily in intergenic, enriched in promoter only, enriched in promoter and depleted in other states, both promoter and intergenic enrichment, enriched in promoter states away from TSS and intergenic states.

**b. Heatmap showing fold enrichments (red) and depletions (green) of chromatin states for transcription factor binding** (from left to right ) c-Myc<sup>8</sup>, ERalpha<sup>9</sup>, ERalpha<sup>10</sup>, FoxA1<sup>9</sup>, GABP<sup>11</sup>, KAP1<sup>12</sup>, RelA<sup>13</sup>, NRSF<sup>14</sup>, NRSF monoclonal and polyclonal<sup>11</sup>, p53<sup>15</sup>, p63 (actinomycinD (+) and (-))<sup>16</sup>, SRF<sup>11</sup>, STAT1 stimulated and unstimulated<sup>17</sup>, USF1 and USF2<sup>18</sup>. 'Overall %' row indicates the percentage of 200bp intervals that overlap peak calls for each transcription factor.

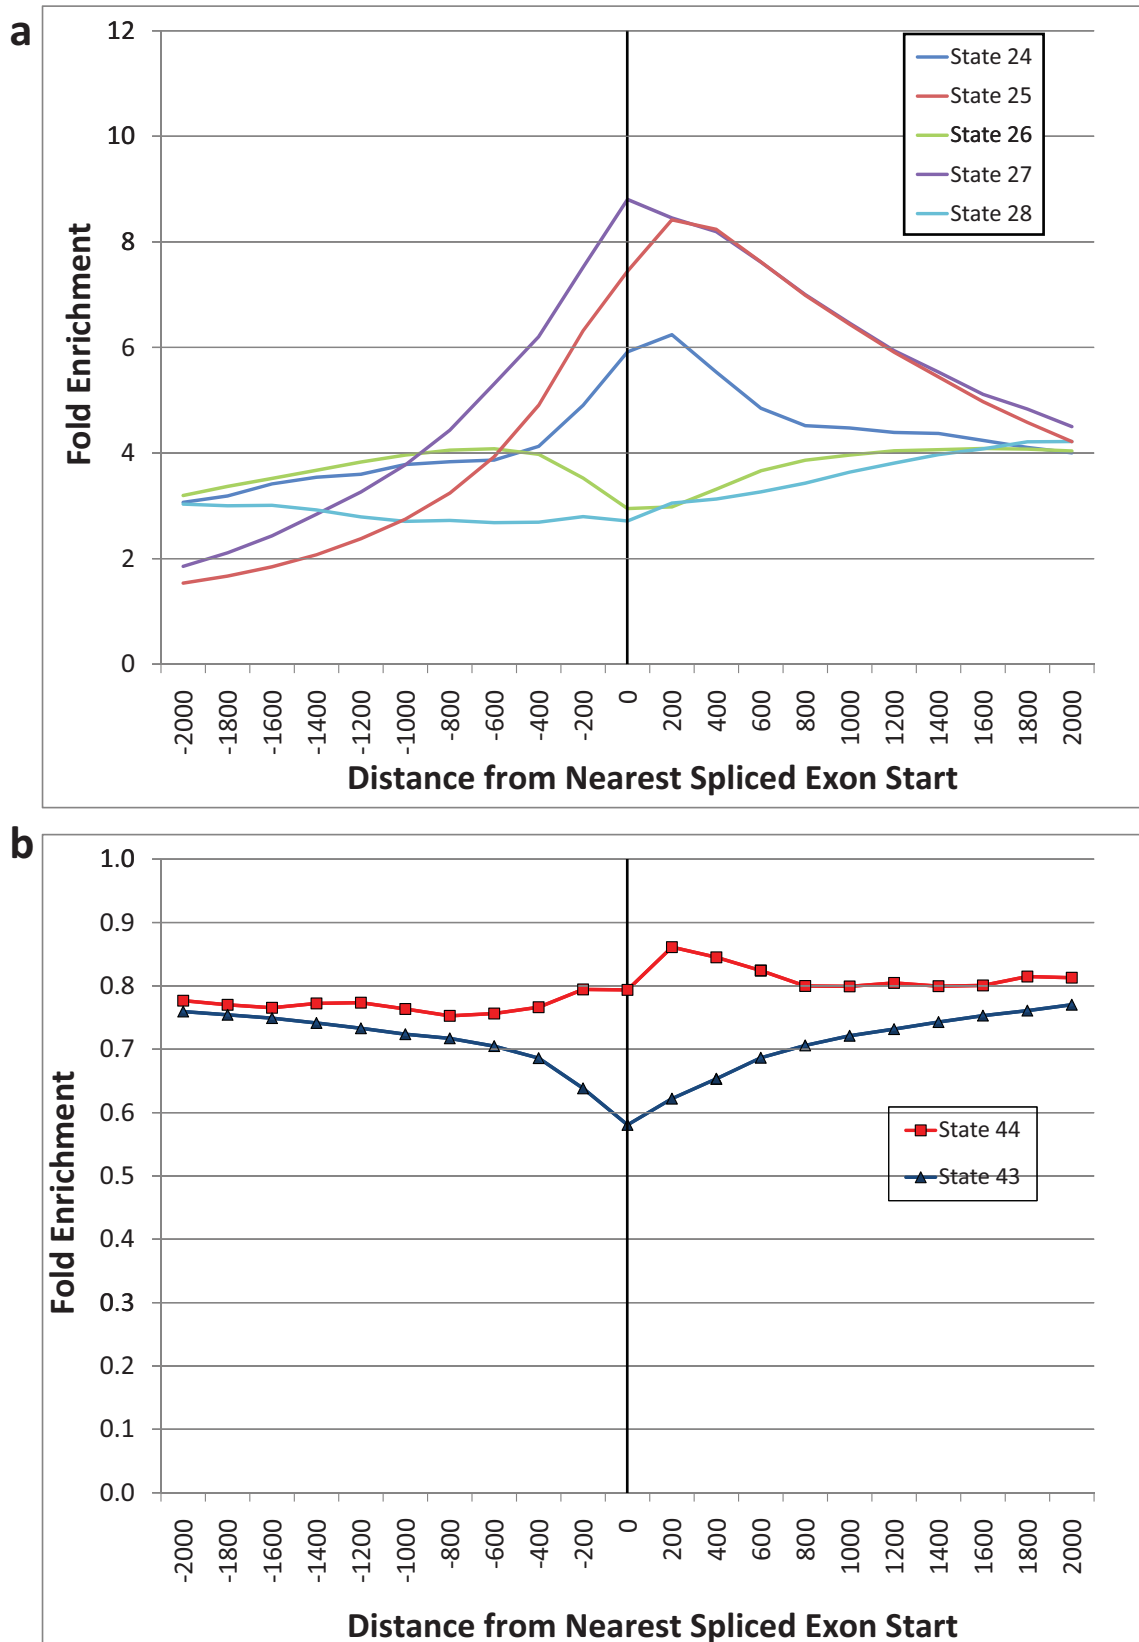

**Supplementary Figure 24: Spliced exon enrichments/depletion.** Fold enrichment (y-axis) relative to distance from the 5'-end of nearest start of a spliced exon (2<sup>nd</sup> exon or later) (x-axis, shown in the direction of transcription) for subset of transcribed and repressed states. **a. Transcribed states 24-28.** These five states show relative enrichment and depletion patterns with respect to spliced exon boundaries. States 24 and 25 enrichment peaked downstream of the start of the exon while the enrichment of States 21-23 was centered on the start of the exon (**Figure 3c**). These were separated for clarity, due to their different positional biases. **b. Repressed states 43-44.** State 43 shows its greatest depletion near spliced exon 5' boundaries, while state 44 had less depletion at the interval 200bp downstream of the 5' end of exon as compared to flanking regions. State 44 had a relatively greater frequency for H3K27me2 and H3K27me3 consistent with observations made previously on the association of repressive modifications with exons<sup>19</sup>.

| state | Resting Unphos. Pol2 | Active Unphos. Pol2 | Resting Phos. Pol2 | Active Phos. Pol2 |
|-------|----------------------|---------------------|--------------------|-------------------|
| 1     | 4.3                  | 1.4                 | 3.1                | 3.1               |
| 2     | 2.2                  | 1.1                 | 2.0                | 2.3               |
| 3     | 1.4                  | 0.8                 | 1.3                | 1.6               |
| 4     | 0.6                  | 0.5                 | 0.5                | 0.6               |
| 5     | 2.2                  | 0.7                 | 1.6                | 1.6               |
| 6     | 3.6                  | 1.1                 | 2.5                | 2.5               |
| 7     | 5.1                  | 1.4                 | 3.2                | 3.4               |
| 8     | 4.1                  | 1.1                 | 3.4                | 3.2               |
| 9     | 3.0                  | 1.1                 | 3.6                | 3.5               |
| 10    | 3.2                  | 1.1                 | 3.1                | 3.0               |
| 11    | 2.3                  | 1.1                 | 2.8                | 3.3               |
| 12    | 1.5                  | 1.0                 | 2.5                | 2.6               |
| 13    | 1.2                  | 1.0                 | 2.2                | 2.4               |
| 14    | 1.5                  | 1.0                 | 2.1                | 2.2               |
| 15    | 1.3                  | 1.0                 | 2.1                | 2.1               |
| 16    | 1.2                  | 0.9                 | 1.6                | 1.5               |
| 17    | 1.1                  | 1.0                 | 1.7                | 2.2               |
| 18    | 1.1                  | 1.0                 | 1.5                | 1.8               |
| 19    | 1.1                  | 0.9                 | 1.3                | 1.4               |
| 20    | 1.7                  | 1.0                 | 2.0                | 2.3               |
| 21    | 1.2                  | 0.9                 | 1.8                | 2.4               |
| 22    | 0.8                  | 0.9                 | 1.5                | 2.0               |
| 23    | 0.7                  | 0.8                 | 1.0                | 1.4               |
| 24    | 1.0                  | 1.0                 | 1.4                | 2.0               |
| 25    | 1.0                  | 1.0                 | 1.3                | 1.7               |
| 26    | 1.0                  | 1.0                 | 1.2                | 1.5               |
| 27    | 1.5                  | 1.1                 | 3.4                | 3.7               |
| 28    | 1.1                  | 1.1                 | 1.3                | 1.3               |
| 29    | 2.2                  | 1.0                 | 2.2                | 2.0               |
| 30    | 2.3                  | 1.1                 | 2.3                | 2.0               |
| 31    | 1.4                  | 1.1                 | 1.3                | 1.7               |
| 32    | 1.0                  | 0.9                 | 1.1                | 1.3               |
| 33    | 1.2                  | 1.0                 | 1.3                | 1.6               |
| 34    | 1.2                  | 1.0                 | 1.3                | 1.5               |
| 35    | 0.9                  | 1.0                 | 0.9                | 1.0               |
| 36    | 0.8                  | 0.9                 | 0.8                | 0.9               |
| 37    | 0.9                  | 0.9                 | 0.8                | 0.8               |
| 38    | 1.0                  | 1.0                 | 0.9                | 1.1               |
| 39    | 1.4                  | 0.9                 | 1.4                | 1.5               |
| 40    | 0.8                  | 1.0                 | 0.7                | 0.9               |
| 41    | 0.9                  | 1.0                 | 0.8                | 0.7               |
| 42    | 0.9                  | 1.1                 | 0.8                | 0.7               |
| 43    | 0.9                  | 1.0                 | 0.8                | 0.7               |
| 44    | 0.8                  | 1.0                 | 0.8                | 0.7               |
| 45    | 0.8                  | 1.0                 | 0.7                | 0.7               |
| 46    | 0.7                  | 0.9                 | 0.7                | 0.8               |
| 47    | 1.0                  | 1.0                 | 0.9                | 0.8               |
| 48    | 0.7                  | 1.0                 | 0.7                | 0.6               |
| 49    | 0.6                  | 0.7                 | 0.5                | 0.4               |
| 50    | 0.7                  | 0.9                 | 0.6                | 0.5               |
| 51    | 1.5                  | 1.8                 | 1.4                | 1.4               |

**Supplementary Figure 25: Elongating vs. resting Pol2 enrichments relative to an IgG control.** The table shows the fold enrichments for phosphorylated (elongating) and unphosphorylated (stalled) Pol2 for sequence reads in resting and active CD4 T<sup>1</sup> relative to IgG control<sup>6</sup>. While the Pol2 data used in learning our model was not specific to either form, this table shows that the highly-expressed transcribed state 27 is much more enriched for phosphorylated Pol2 in both active and resting cells, while in contrast the active TSS states (States 5-7) were more enriched for the unphosphorylated Pol2 in resting cells, showing that the remaining marks are a good predictor for the form of Pol2. The read counts for the enrichments were determined based on the 5' end of the read after applying a 100 bp shift in the 5' to 3' direction.

States ordered by GC content

| state | aa/tt | at   | ta  | ga/tc | ag/ct | ac/gt | ca/tg | cg  | gc   | cc/gg | GC%  |
|-------|-------|------|-----|-------|-------|-------|-------|-----|------|-------|------|
| 5     | 4.8   | 2.9  | 2.5 | 5.4   | 6.4   | 4.0   | 5.3   | 8.7 | 10.9 | 11.7  | 64.0 |
| 4     | 4.9   | 3.0  | 2.5 | 5.9   | 7.0   | 4.3   | 6.0   | 6.9 | 9.7  | 10.7  | 61.4 |
| 6     | 5.1   | 3.0  | 2.6 | 5.9   | 6.9   | 4.5   | 5.8   | 7.4 | 9.7  | 10.6  | 61.3 |
| 7     | 5.0   | 2.8  | 2.6 | 6.2   | 7.1   | 4.7   | 5.8   | 7.2 | 9.2  | 10.3  | 60.9 |
| 22    | 5.1   | 4.0  | 2.9 | 6.1   | 7.9   | 5.3   | 8.2   | 2.5 | 7.3  | 9.1   | 55.5 |
| 21    | 5.2   | 4.0  | 3.0 | 6.1   | 7.9   | 5.2   | 8.0   | 2.5 | 7.1  | 9.3   | 55.4 |
| 23    | 5.8   | 4.2  | 3.2 | 6.0   | 7.7   | 5.1   | 7.7   | 2.7 | 7.1  | 9.1   | 54.5 |
| 8     | 6.8   | 4.4  | 3.9 | 6.0   | 7.1   | 4.8   | 6.4   | 4.7 | 7.4  | 8.8   | 54.0 |
| 3     | 6.8   | 4.4  | 3.8 | 6.1   | 7.3   | 4.8   | 6.7   | 4.2 | 7.3  | 8.5   | 53.4 |
| 10    | 5.9   | 4.1  | 3.4 | 6.4   | 8.0   | 5.3   | 7.6   | 2.7 | 6.6  | 8.4   | 53.3 |
| 1     | 6.4   | 4.1  | 3.6 | 6.4   | 7.8   | 5.2   | 7.2   | 3.4 | 6.7  | 8.1   | 52.9 |
| 20    | 6.2   | 4.7  | 3.7 | 6.2   | 8.0   | 5.3   | 8.1   | 1.7 | 6.2  | 8.0   | 51.6 |
| 46    | 4.2   | 5.9  | 4.0 | 4.7   | 5.9   | 8.5   | 11.6  | 1.8 | 6.2  | 6.0   | 50.9 |
| 12    | 6.4   | 4.8  | 3.8 | 6.3   | 8.1   | 5.3   | 8.1   | 1.3 | 6.0  | 7.8   | 50.7 |
| 32    | 6.5   | 5.0  | 3.8 | 6.4   | 8.1   | 5.2   | 8.0   | 1.3 | 5.8  | 7.8   | 50.5 |
| 2     | 7.2   | 4.8  | 4.1 | 6.3   | 7.7   | 5.2   | 7.3   | 2.7 | 6.2  | 7.4   | 50.1 |
| 11    | 7.2   | 5.1  | 4.4 | 6.1   | 7.7   | 5.2   | 7.5   | 2.2 | 6.0  | 7.5   | 49.6 |
| 29    | 6.9   | 5.1  | 4.1 | 6.4   | 8.1   | 5.2   | 7.9   | 1.3 | 5.6  | 7.4   | 49.4 |
| 35    | 7.0   | 5.4  | 4.2 | 6.4   | 8.0   | 5.1   | 7.9   | 1.2 | 5.6  | 7.4   | 49.0 |
| 33    | 7.6   | 5.7  | 4.7 | 6.1   | 7.7   | 5.2   | 7.8   | 1.4 | 5.5  | 6.9   | 47.6 |
| 17    | 7.6   | 6.0  | 5.1 | 6.1   | 7.8   | 5.4   | 8.0   | 1.0 | 5.3  | 6.4   | 46.4 |
| 31    | 8.1   | 5.8  | 4.9 | 6.3   | 7.9   | 5.2   | 7.7   | 1.2 | 5.2  | 6.2   | 46.0 |
| 13    | 8.0   | 6.1  | 5.2 | 6.0   | 7.6   | 5.3   | 7.8   | 1.2 | 5.2  | 6.4   | 46.0 |
| 36    | 8.3   | 6.4  | 5.2 | 6.1   | 7.5   | 5.0   | 7.6   | 1.3 | 5.1  | 6.5   | 45.6 |
| 24    | 8.0   | 6.2  | 5.3 | 6.1   | 7.7   | 5.3   | 7.8   | 1.1 | 5.2  | 6.2   | 45.6 |
| 45    | 8.5   | 6.5  | 5.4 | 6.2   | 7.4   | 5.0   | 7.4   | 1.4 | 5.0  | 6.4   | 45.2 |
| 39    | 8.8   | 6.6  | 5.7 | 5.9   | 7.3   | 5.1   | 7.4   | 1.4 | 5.1  | 6.1   | 44.3 |
| 27    | 8.9   | 6.5  | 5.7 | 5.9   | 7.3   | 5.2   | 7.4   | 1.3 | 5.0  | 6.0   | 44.2 |
| 44    | 8.4   | 6.9  | 5.6 | 6.2   | 7.5   | 5.2   | 7.8   | 0.9 | 4.8  | 5.9   | 44.1 |
| 34    | 9.2   | 6.7  | 5.8 | 6.0   | 7.3   | 5.0   | 7.3   | 1.3 | 4.8  | 6.0   | 43.7 |
| 38    | 9.1   | 6.8  | 5.8 | 6.2   | 7.5   | 5.1   | 7.4   | 1.0 | 4.7  | 5.6   | 43.0 |
| 30    | 9.4   | 6.8  | 5.9 | 6.1   | 7.3   | 5.1   | 7.3   | 1.1 | 4.5  | 5.6   | 42.6 |
| 51    | 8.9   | 8.5  | 4.8 | 7.3   | 6.3   | 5.1   | 7.7   | 2.1 | 3.7  | 5.1   | 42.5 |
| 37    | 9.4   | 7.2  | 6.1 | 6.0   | 7.1   | 5.0   | 7.3   | 1.1 | 4.6  | 5.7   | 42.5 |
| 14    | 9.4   | 7.0  | 6.1 | 6.0   | 7.3   | 5.1   | 7.3   | 1.0 | 4.4  | 5.6   | 42.3 |
| 9     | 10.1  | 7.2  | 6.6 | 5.6   | 6.7   | 5.0   | 6.6   | 2.1 | 4.8  | 5.6   | 42.1 |
| 18    | 9.5   | 7.2  | 6.4 | 5.9   | 7.3   | 5.2   | 7.4   | 0.9 | 4.4  | 5.3   | 41.7 |
| 25    | 9.5   | 7.3  | 6.4 | 6.0   | 7.2   | 5.2   | 7.4   | 1.0 | 4.4  | 5.2   | 41.6 |
| 43    | 9.7   | 7.7  | 6.4 | 6.0   | 7.1   | 5.0   | 7.3   | 0.9 | 4.2  | 5.3   | 41.1 |
| 48    | 10.1  | 7.4  | 5.8 | 6.2   | 7.0   | 5.0   | 7.5   | 1.0 | 4.2  | 5.0   | 41.0 |
| 16    | 10.2  | 7.4  | 6.6 | 5.7   | 6.9   | 5.1   | 7.0   | 1.3 | 4.5  | 5.2   | 40.9 |
| 50    | 9.4   | 10.7 | 4.2 | 8.0   | 5.2   | 4.2   | 8.0   | 1.8 | 2.8  | 5.4   | 40.9 |
| 28    | 9.7   | 7.6  | 6.5 | 6.0   | 7.0   | 5.3   | 7.5   | 0.9 | 4.1  | 5.1   | 40.9 |
| 19    | 10.3  | 7.6  | 6.8 | 5.7   | 6.9   | 5.1   | 7.1   | 1.1 | 4.3  | 5.1   | 40.3 |
| 26    | 10.2  | 7.7  | 6.8 | 5.8   | 6.9   | 5.1   | 7.1   | 1.0 | 4.2  | 5.0   | 40.2 |
| 49    | 10.0  | 9.6  | 4.8 | 7.5   | 5.9   | 4.5   | 7.8   | 1.5 | 3.2  | 4.8   | 39.9 |
| 40    | 10.1  | 8.1  | 6.9 | 5.9   | 6.8   | 5.1   | 7.3   | 0.9 | 4.0  | 4.9   | 39.8 |
| 15    | 10.4  | 7.8  | 7.0 | 5.7   | 6.9   | 5.2   | 7.1   | 1.0 | 4.0  | 4.8   | 39.5 |
| 42    | 10.0  | 8.3  | 7.1 | 5.9   | 7.0   | 5.1   | 7.4   | 0.7 | 4.0  | 4.7   | 39.3 |
| 47    | 10.8  | 8.6  | 7.4 | 5.8   | 6.7   | 5.0   | 7.1   | 0.6 | 3.6  | 4.4   | 37.6 |
| 41    | 11.1  | 9.1  | 7.8 | 5.8   | 6.6   | 5.0   | 7.0   | 0.6 | 3.4  | 4.1   | 36.6 |

States ordered by state id

| state | aa/tt | at   | ta  | ga/tc | ag/ct | ac/gt | ca/tg | cg  | gc   | cc/gg | GC%  |
|-------|-------|------|-----|-------|-------|-------|-------|-----|------|-------|------|
| 1     | 6.4   | 4.1  | 3.6 | 6.4   | 7.8   | 5.2   | 7.2   | 3.4 | 6.7  | 8.1   | 52.9 |
| 2     | 7.2   | 4.8  | 4.1 | 6.3   | 7.7   | 5.2   | 7.3   | 2.7 | 6.2  | 7.4   | 50.1 |
| 3     | 6.8   | 4.4  | 3.8 | 6.1   | 7.3   | 4.8   | 6.7   | 4.2 | 7.3  | 8.5   | 53.4 |
| 4     | 4.9   | 3.0  | 2.5 | 5.9   | 7.0   | 4.3   | 6.0   | 6.9 | 9.7  | 10.7  | 61.4 |
| 5     | 4.8   | 2.9  | 2.5 | 5.4   | 6.4   | 4.0   | 5.3   | 8.7 | 10.9 | 11.7  | 64.0 |
| 6     | 5.1   | 3.0  | 2.6 | 5.9   | 6.9   | 4.5   | 5.8   | 7.4 | 9.7  | 10.6  | 61.3 |
| 7     | 5.0   | 2.8  | 2.6 | 6.2   | 7.1   | 4.7   | 5.8   | 7.2 | 9.2  | 10.3  | 60.9 |
| 8     | 6.8   | 4.4  | 3.9 | 6.0   | 7.1   | 4.8   | 6.4   | 4.7 | 7.4  | 8.8   | 54.0 |
| 9     | 10.1  | 7.2  | 6.6 | 5.6   | 6.7   | 5.0   | 6.6   | 2.1 | 4.8  | 5.6   | 42.1 |
| 10    | 5.9   | 4.1  | 3.4 | 6.4   | 8.0   | 5.3   | 7.6   | 2.7 | 6.6  | 8.4   | 53.3 |
| 11    | 7.2   | 5.1  | 4.4 | 6.1   | 7.7   | 5.2   | 7.5   | 2.2 | 6.0  | 7.5   | 49.6 |
| 12    | 6.4   | 4.8  | 3.8 | 6.3   | 8.1   | 5.3   | 8.1   | 1.3 | 6.0  | 7.8   | 50.7 |
| 13    | 8.0   | 6.1  | 5.2 | 6.0   | 7.6   | 5.3   | 7.8   | 1.2 | 5.2  | 6.4   | 46.0 |
| 14    | 9.4   | 7.0  | 6.1 | 6.0   | 7.3   | 5.1   | 7.3   | 1.0 | 4.4  | 5.6   | 42.3 |
| 15    | 10.4  | 7.8  | 7.0 | 5.7   | 6.9   | 5.2   | 7.1   | 1.0 | 4.0  | 4.8   | 39.5 |
| 16    | 10.2  | 7.4  | 6.6 | 5.7   | 6.9   | 5.1   | 7.0   | 1.3 | 4.5  | 5.2   | 40.9 |
| 17    | 7.6   | 6.0  | 5.1 | 6.1   | 7.8   | 5.4   | 8.0   | 1.0 | 5.3  | 6.4   | 46.4 |
| 18    | 9.5   | 7.2  | 6.4 | 5.9   | 7.3   | 5.2   | 7.4   | 0.9 | 4.4  | 5.3   | 41.7 |
| 19    | 10.3  | 7.6  | 6.8 | 5.7   | 6.9   | 5.1   | 7.1   | 1.1 | 4.3  | 5.1   | 40.3 |
| 20    | 6.2   | 4.7  | 3.7 | 6.2   | 8.0   | 5.3   | 8.1   | 1.7 | 6.2  | 8.0   | 51.6 |
| 21    | 5.2   | 4.0  | 3.0 | 6.1   | 7.9   | 5.2   | 8.0   | 2.5 | 7.1  | 9.3   | 55.4 |
| 22    | 5.1   | 4.0  | 2.9 | 6.1   | 7.9   | 5.3   | 8.2   | 2.5 | 7.3  | 9.1   | 55.5 |
| 23    | 5.8   | 4.2  | 3.2 | 6.0   | 7.7   | 5.1   | 7.7   | 2.7 | 7.1  | 9.1   | 54.5 |
| 24    | 8.0   | 6.2  | 5.3 | 6.1   | 7.7   | 5.3   | 7.8   | 1.1 | 5.2  | 6.2   | 45.6 |
| 25    | 9.5   | 7.3  | 6.4 | 6.0   | 7.2   | 5.2   | 7.4   | 1.0 | 4.4  | 5.2   | 41.6 |
| 26    | 10.2  | 7.7  | 6.8 | 5.8   | 6.9   | 5.1   | 7.1   | 1.0 | 4.2  | 5.0   | 40.2 |
| 27    | 8.9   | 6.5  | 5.7 | 5.9   | 7.3   | 5.2   | 7.4   | 1.3 | 5.0  | 6.0   | 44.2 |
| 28    | 9.7   | 7.6  | 6.5 | 6.0   | 7.0   | 5.3   | 7.5   | 0.9 | 4.1  | 5.1   | 40.9 |
| 29    | 6.9   | 5.1  | 4.1 | 6.4   | 8.1   | 5.2   | 7.9   | 1.3 | 5.6  | 7.4   | 49.4 |
| 30    | 9.4   | 6.8  | 5.9 | 6.1   | 7.3   | 5.1   | 7.3   | 1.1 | 4.5  | 5.6   | 42.6 |
| 31    | 8.1   | 5.8  | 4.9 | 6.3   | 7.9   | 5.2   | 7.7   | 1.2 | 5.2  | 6.2   | 46.0 |
| 32    | 6.5   | 5.0  | 3.8 | 6.4   | 8.1   | 5.2   | 8.0   | 1.3 | 5.8  | 7.8   | 50.5 |
| 33    | 7.6   | 5.7  | 4.7 | 6.1   | 7.7   | 5.2   | 7.8   | 1.4 | 5.5  | 6.9   | 47.6 |
| 34    | 9.2   | 6.7  | 5.8 | 6.0   | 7.3   | 5.0   | 7.3   | 1.3 | 4.8  | 6.0   | 43.7 |
| 35    | 7.0   | 5.4  | 4.2 | 6.4   | 8.0   | 5.1   | 7.9   | 1.2 | 5.6  | 7.4   | 49.0 |
| 36    | 8.3   | 6.4  | 5.2 | 6.1   | 7.5   | 5.0   | 7.6   | 1.3 | 5.1  | 6.5   | 45.6 |
| 37    | 9.4   | 7.2  | 6.1 | 6.0   | 7.1   | 5.0   | 7.3   | 1.1 | 4.6  | 5.7   | 42.5 |
| 38    | 9.1   | 6.8  | 5.8 | 6.2   | 7.5   | 5.1   | 7.4   | 1.0 | 4.7  | 5.6   | 43.0 |
| 39    | 8.8   | 6.6  | 5.7 | 5.9   | 7.3   | 5.1   | 7.4   | 1.4 | 5.1  | 6.1   | 44.3 |
| 40    | 10.1  | 8.1  | 6.9 | 5.9   | 6.8   | 5.1   | 7.3   | 0.9 | 4.0  | 4.9   | 39.8 |
| 41    | 11.1  | 9.1  | 7.8 | 5.8   | 6.6   | 5.0   | 7.0   | 0.6 | 3.4  | 4.1   | 36.6 |
| 42    | 10.0  | 8.3  | 7.1 | 5.9   | 7.0   | 5.1   | 7.4   | 0.7 | 4.0  | 4.7   | 39.3 |
| 43    | 9.7   | 7.7  | 6.4 | 6.0   | 7.1   | 5.0   | 7.3   | 0.9 | 4.2  | 5.3   | 41.1 |
| 44    | 8.4   | 6.9  | 5.6 | 6.2   | 7.5   | 5.2   | 7.8   | 0.9 | 4.8  | 5.9   | 44.1 |
| 45    | 8.5   | 6.5  | 5.4 | 6.2   | 7.4   | 5.0   | 7.4   | 1.4 | 5.0  | 6.4   | 45.2 |
| 46    | 4.2   | 5.9  | 4.0 | 4.7   | 5.9   | 8.5   | 11.6  | 1.8 | 6.2  | 6.0   | 50.9 |
| 47    | 10.8  | 8.6  | 7.4 | 5.8   | 6.7   | 5.0   | 7.1   | 0.6 | 3.6  | 4.4   | 37.6 |
| 48    | 10.1  | 7.4  | 5.8 | 6.2   | 7.0   | 5.0   | 7.5   | 1.0 | 4.2  | 5.0   | 41.0 |
| 49    | 10.0  | 9.6  | 4.8 | 7.5   | 5.9   | 4.5   | 7.8   | 1.5 | 3.2  | 4.8   | 39.9 |
| 50    | 9.4   | 10.7 | 4.2 | 8.0   | 5.2   | 4.2   | 8.0   | 1.8 | 2.8  | 5.4   | 40.9 |
| 51    | 8.9   | 8.5  | 4.8 | 7.3   | 6.3   | 5.1   | 7.7   | 2.1 | 3.7  | 5.1   | 42.5 |

**Supplementary Figure 26: State di-nucleotide composition.** Left table show the percentage of di-nucleotide pairs in each of the states, grouping dinucleotides that are reverse complements of each other as they have the same occurrences. Right side contains the same information, sorted by GC percentage. This table shows that State 46 has the highest ca/tg di-nucleotide occurrence frequency of any state, and that the TSS states (4-7) have the highest CpG frequency.

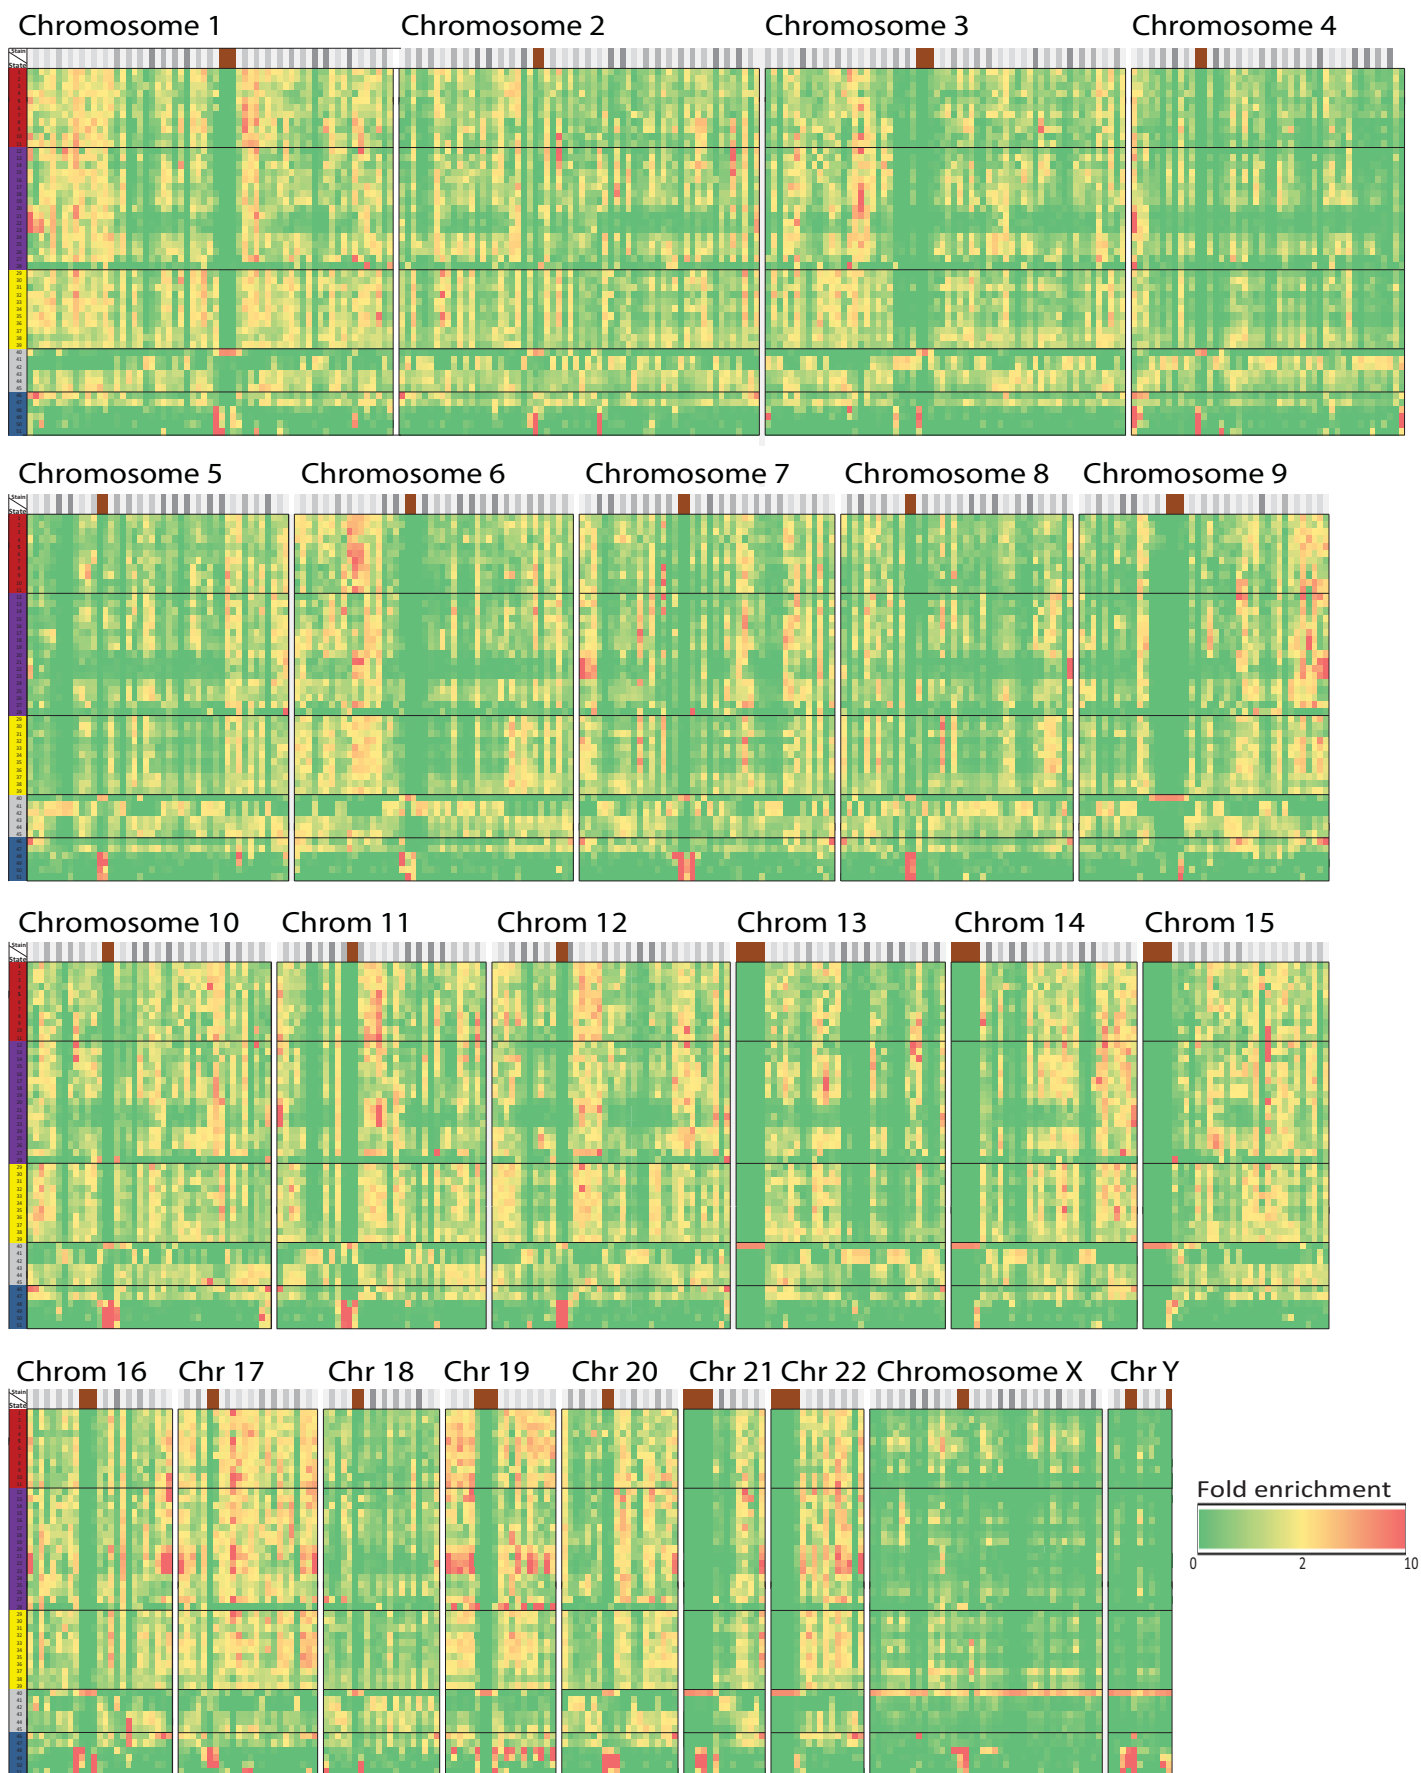

**Supplementary Figure 27: Chromatin state enrichments for each chromosomal staining band for all human chromosomes.** For each chromosome, the staining pattern is shown (top row) with gneg (no stain), gpos25, gpos50, gpos75, and gpos100 patterns shown using progressively darker shades, and brown used to represent stalk, acrocentric, and variable heterochromatic bands (see **Supplementary Fig. 28** headers for color legend). The coordinates of the bands and staining patterns were obtained from the UCSC genome browser<sup>20,21</sup>. This figure shows that the satellite enriched states (48-51) are enriched in centromere regions of the chromosome, that specific chromosome bands with darker stains are found with states 41 and 42, that the zinc finger enriched state (state 28) enriches on chromosome 19, and the unmappable state (state 40) enriches on regions at the beginning of several chromosomes.

| state     | stalk | variable heterochromatic | acrocentric | gneg | gpos25 | gpos50 | gpos75 | gpos100 |
|-----------|-------|--------------------------|-------------|------|--------|--------|--------|---------|
| 1         | 0.0   | 0.1                      | 0.1         | 1.5  | 1.7    | 1.0    | 0.6    | 0.3     |
| 2         | 0.0   | 0.1                      | 0.1         | 1.4  | 1.6    | 1.0    | 0.6    | 0.4     |
| 3         | 0.0   | 0.1                      | 0.1         | 1.4  | 1.7    | 1.0    | 0.6    | 0.4     |
| 4         | 0.0   | 0.1                      | 0.1         | 1.4  | 1.6    | 1.0    | 0.7    | 0.4     |
| 5         | 0.0   | 0.1                      | 0.1         | 1.6  | 1.6    | 0.9    | 0.5    | 0.3     |
| 6         | 0.0   | 0.1                      | 0.1         | 1.5  | 1.8    | 1.0    | 0.5    | 0.3     |
| 7         | 0.0   | 0.1                      | 0.1         | 1.4  | 1.7    | 1.0    | 0.6    | 0.4     |
| 8         | 0.0   | 0.0                      | 0.1         | 1.5  | 1.5    | 1.0    | 0.5    | 0.3     |
| 9         | 0.0   | 0.0                      | 0.2         | 1.5  | 1.3    | 1.0    | 0.6    | 0.5     |
| 10        | 0.0   | 0.1                      | 0.0         | 1.6  | 1.7    | 0.9    | 0.4    | 0.2     |
| 11        | 0.0   | 0.0                      | 0.1         | 1.6  | 1.7    | 0.9    | 0.4    | 0.2     |
| 12        | 0.0   | 0.0                      | 0.1         | 1.6  | 1.6    | 1.0    | 0.4    | 0.2     |
| 13        | 0.0   | 0.0                      | 0.1         | 1.6  | 1.6    | 1.0    | 0.4    | 0.2     |
| 14        | 0.0   | 0.0                      | 0.1         | 1.5  | 1.2    | 1.2    | 0.6    | 0.3     |
| 15        | 0.0   | 0.1                      | 0.1         | 1.5  | 1.5    | 1.0    | 0.6    | 0.4     |
| 16        | 0.0   | 0.1                      | 0.1         | 1.4  | 1.4    | 1.1    | 0.7    | 0.4     |
| 17        | 0.0   | 0.0                      | 0.1         | 1.5  | 1.5    | 1.2    | 0.6    | 0.3     |
| 18        | 0.0   | 0.0                      | 0.1         | 1.4  | 1.4    | 1.1    | 0.7    | 0.4     |
| 19        | 0.0   | 0.1                      | 0.1         | 1.4  | 1.5    | 1.1    | 0.8    | 0.4     |
| 20        | 0.0   | 0.0                      | 0.1         | 1.6  | 1.8    | 0.9    | 0.4    | 0.2     |
| 21        | 0.0   | 0.0                      | 0.1         | 1.8  | 2.0    | 0.6    | 0.2    | 0.1     |
| 22        | 0.0   | 0.0                      | 0.0         | 1.9  | 1.8    | 0.5    | 0.2    | 0.1     |
| 23        | 0.0   | 0.0                      | 0.0         | 1.8  | 2.0    | 0.5    | 0.2    | 0.1     |
| 24        | 0.0   | 0.1                      | 0.1         | 1.5  | 1.5    | 1.1    | 0.6    | 0.3     |
| 25        | 0.0   | 0.1                      | 0.1         | 1.4  | 1.4    | 1.2    | 0.8    | 0.4     |
| 26        | 0.0   | 0.1                      | 0.1         | 1.3  | 1.4    | 1.1    | 0.8    | 0.5     |
| 27        | 0.0   | 0.0                      | 0.0         | 1.6  | 1.8    | 0.9    | 0.4    | 0.3     |
| 28        | 0.0   | 1.9                      | 0.3         | 1.0  | 5.8    | 0.3    | 0.2    | 0.1     |
| 29        | 0.0   | 0.1                      | 0.1         | 1.5  | 1.5    | 1.0    | 0.6    | 0.2     |
| 30        | 0.0   | 0.1                      | 0.1         | 1.4  | 1.3    | 1.1    | 0.7    | 0.4     |
| 31        | 0.0   | 0.1                      | 0.1         | 1.4  | 1.3    | 1.0    | 0.7    | 0.5     |
| 32        | 0.0   | 0.0                      | 0.1         | 1.6  | 1.7    | 0.9    | 0.4    | 0.2     |
| 33        | 0.0   | 0.0                      | 0.1         | 1.5  | 1.8    | 0.9    | 0.5    | 0.3     |
| 34        | 0.0   | 0.1                      | 0.1         | 1.5  | 1.5    | 1.0    | 0.6    | 0.3     |
| 35        | 0.0   | 0.0                      | 0.0         | 1.6  | 1.6    | 0.9    | 0.5    | 0.3     |
| 36        | 0.0   | 0.1                      | 0.1         | 1.5  | 1.6    | 0.9    | 0.5    | 0.3     |
| 37        | 0.0   | 0.1                      | 0.1         | 1.4  | 1.4    | 1.0    | 0.8    | 0.5     |
| 38        | 0.0   | 0.1                      | 0.1         | 1.3  | 1.2    | 1.1    | 0.9    | 0.6     |
| 39        | 0.0   | 0.1                      | 0.1         | 1.3  | 1.5    | 1.1    | 0.8    | 0.5     |
| 40        | 7.6   | 6.6                      | 6.1         | 0.6  | 0.4    | 0.5    | 0.3    | 0.5     |
| 41        | 0.0   | 0.2                      | 0.4         | 0.5  | 0.4    | 0.9    | 1.7    | 2.5     |
| 42        | 0.0   | 0.2                      | 0.3         | 0.5  | 0.5    | 1.1    | 1.7    | 2.2     |
| 43        | 0.0   | 0.1                      | 0.1         | 1.1  | 1.2    | 1.3    | 1.1    | 0.7     |
| 44        | 0.0   | 0.1                      | 0.1         | 1.2  | 1.3    | 1.3    | 1.0    | 0.6     |
| 45        | 0.0   | 0.1                      | 0.1         | 1.3  | 1.6    | 1.3    | 0.8    | 0.4     |
| 46        | 0.0   | 0.1                      | 0.2         | 1.7  | 1.7    | 0.7    | 0.4    | 0.2     |
| 47        | 0.0   | 0.2                      | 0.1         | 1.2  | 1.3    | 1.3    | 0.9    | 0.6     |
| 48        | 0.0   | 3.2                      | 6.2         | 0.8  | 2.2    | 0.2    | 0.5    | 0.4     |
| 49        | 0.0   | 3.6                      | 11.2        | 0.5  | 1.8    | 0.2    | 0.4    | 0.1     |
| 50        | 0.0   | 4.7                      | 12.0        | 0.6  | 0.6    | 0.2    | 0.2    | 0.1     |
| 51        | 0.0   | 4.4                      | 12.7        | 0.5  | 1.4    | 0.2    | 0.2    | 0.1     |
| % Overall | 0.6   | 3.9                      | 3.6         | 42.1 | 6.8    | 13.6   | 13.1   | 16.2    |

**Supplementary Figure 28: Staining band genome-wide enrichments for each state.** Genome-wide fold enrichment of states for each of the staining patterns<sup>21</sup> shows that state 41 and 42 are the only two states enriched for the gpos100 stain.

| GO Category/<br>State           | 1<br>(3%)    | 2<br>(2%) | 3<br>(5%)                     | 4<br>(8%)                      | 5<br>(14%)                      | 6<br>(13%)                       | 7<br>(9%)                        | 8<br>(3%)                       | 36<br>(3%)                       | 37<br>(5%)                      | 40<br>(5%)      | 41<br>(3%)                       | 43<br>(8%)                       | 45<br>(4%)                       |
|---------------------------------|--------------|-----------|-------------------------------|--------------------------------|---------------------------------|----------------------------------|----------------------------------|---------------------------------|----------------------------------|---------------------------------|-----------------|----------------------------------|----------------------------------|----------------------------------|
| tRNA metabolic process          | 4.44 (0.003) | 0.74 (1)  | 1.55 (1)                      | 0.18 (1)                       | 1.35 (1)                        | 1.95 (0.45)                      | 2.44 (0.014)                     | 1.46 (1)                        | 0 (1)                            | 0.42 (1)                        | 0 (1)           | 0 (1)                            | 0 (1)                            | 0 (1)                            |
| Cell Cycle Phase                | 1.16 (1)     | 1.51 (1)  | 2.70<br>(2x10 <sup>-7</sup> ) | 0.57 (1)                       | 1.61<br>0.001                   | 1.45 (1)                         | 1.15 (1)                         | 1.51 (1)                        | 0.65 (1)                         | 0.53 (1)                        | 0.12(1)         | 0.52 (1)                         | 0.38 (1)                         | 0.33 (1)                         |
| Embryonic Development           | 0.50 (1)     | 0.93 (1)  | 1.24 (1)                      | 2.82<br>(9x10 <sup>-23</sup> ) | 1.07 (1)                        | 0.85 (1)                         | 0.54 (1)                         | 1.00 (1)                        | 0.78 (1)                         | 0.39 (1)                        | 0.16 (1)        | 0.53 (1)                         | 0.87 (1)                         | 3.20<br>(2.3x10 <sup>-13</sup> ) |
| Chromatin                       | 0.81 (1)     | 0.64 (1)  | 1.20 (1)                      | 0.48 (1)                       | 2.17<br>(1.4x10 <sup>-7</sup> ) | 1.64 (1)                         | 0.85 (1)                         | 0.85 (1)                        | 1.43 (1)                         | 0.40 (1)                        | 1.71 (1)        | 0 (1)                            | 0.39 (1)                         | 0 (1)                            |
| Response to DNA Damage Stimulus | 2.04 (1)     | 1.14 (1)  | 1.20 (1)                      | 0.35 (1)                       | 1.55 (0.074)                    | 2.13<br>(6.5x10 <sup>-13</sup> ) | 1.97<br>(1.0x10 <sup>-4</sup> )  | 0.84 (1)                        | 0.19 (1)                         | 0.58 (1)                        | 0.72 (1)        | 0 (1)                            | 0.15 (1)                         | 0.07 (1)                         |
| RNA Processing                  | 1.71 (1)     | 0.77 (1)  | 0.49 (1)                      | 0.26 (1)                       | 1.31 (1)                        | 1.91<br>(4.2x10 <sup>-11</sup> ) | 2.64<br>(8.7x10 <sup>-24</sup> ) | 2.46<br>(3.0x10 <sup>-4</sup> ) | 0.19 (1)                         | 0.16 (1)                        | 0.54 (1)        | 0.13 (1)                         | 0.08 (1)                         | 0.17 (1)                         |
| T cell Activation               | 1.46 (1)     | 2.70(1)   | 0.77 (1)                      | 0.88 (1)                       | 1.27 (1)                        | 0.70 (1)                         | 0.79 (1)                         | 4.72<br>(2x10 <sup>-7</sup> )   | 0.41 (1)                         | 0.52 (1)                        | 0.31 (1)        | 0 (1)                            | 0.50 (1)                         | 0.85 (1)                         |
| Intermediate Filament           | 0.20 (1)     | 0.51 (1)  | 0.24 (1)                      | 0.45 (1)                       | 0.37 (1)                        | 0.08 (1)                         | 0.11 (1)                         | 0 (1)                           | 7.84<br>(9.2x10 <sup>-21</sup> ) | 1.67 (1)                        | 0 (1)           | 4.38<br>(9.1x10 <sup>-5</sup> )  | 2.81<br>(1.8x10 <sup>-7</sup> )  | 0.40 (1)                         |
| Hormone Activity                | 0.27 (1)     | 0.34 (1)  | 0.83 (1)                      | 1.24 (1)                       | 0.15(1)                         | 0.11 (1)                         | 0.39 (1)                         | 0(1)                            | 1.58 (1)                         | 3.33<br>(4.3x10 <sup>-4</sup> ) | 1.4 (1)         | 0.83 (1)                         | 1.54 (1)                         | 2.73 (1)                         |
| Male Gamete Generation          | 1.13 (1)     | 1.13 (1)  | 0.77 (1)                      | 1.14 (1)                       | 0.67 (1)                        | 0.97 (1)                         | 0.65 (1)                         | 0.76 (1)                        | 2.35 (1)                         | 1.67 (1)                        | 2.80<br>(0.002) | 1.43 (1)                         | 0.94 (1)                         | 0.67 (1)                         |
| Olfactory Receptor Activity     | 0 (1)        | 0.12 (1)  | 0.11 (1)                      | 0 (1)                          | 0 (1)                           | 0.02 (1)                         | 0 (1)                            | 0 (1)                           | 0.70 (1)                         | 0.93 (1)                        | 1.53 (1)        | 8.04<br>(2.3x10 <sup>-49</sup> ) | 5.19<br>(1.1x10 <sup>-89</sup> ) | 0.66 (1)                         |

**Supplementary Figure 29: Gene Ontology (GO) enrichments for states with the most transcription start sites (TSS).** The table shows the Gene Ontology (GO) enrichments for selected GO categories for the states with the largest number of RefSeq TSS assigned to them based on mostly like state assignments. On the top row, colored by state grouping, are listed the states and for each the percentage of RefSeq TSS that are assigned to that state. In each cell is the fold enrichment and Bonferroni-corrected p-value for genes of that category with a TSS in that state computed using the STEM software<sup>22</sup>. Cells with p-values <=0.01 are highlighted in yellow.

| state | H3K9ac 0h | H4K16ac 0h | PolII 0h | H3K9ac: log <sub>2</sub> (2h/0h) | H3K9ac: log <sub>2</sub> (8h/0h) | H4K16ac: log <sub>2</sub> (2h/0h) | H4K16ac: log <sub>2</sub> (8h/0h) | PolII log <sub>2</sub> (8h/0h) | PolII log <sub>2</sub> (2h/0h) |
|-------|-----------|------------|----------|----------------------------------|----------------------------------|-----------------------------------|-----------------------------------|--------------------------------|--------------------------------|
| 1     | 20.9      | 16.8       | 6.5      | 1.6                              | 1.6                              | 1.6                               | 1.0                               | -0.2                           | 0.6                            |
| 2     | 9.3       | 7.7        | 4.1      | 2.0                              | 1.9                              | 2.0                               | 1.5                               | -0.1                           | 0.6                            |
| 3     | 4.6       | 3.2        | 3.5      | 2.3                              | 2.2                              | 2.7                               | 2.3                               | 0.0                            | 0.8                            |
| 4     | 1.2       | 0.7        | 1.9      | 1.7                              | 1.9                              | 2.8                               | 2.8                               | 0.1                            | 0.7                            |
| 5     | 4.8       | 3.0        | 5.5      | 2.2                              | 1.7                              | 2.7                               | 2.0                               | -0.1                           | 1.2                            |
| 6     | 11.8      | 7.0        | 7.7      | 2.0                              | 1.6                              | 2.4                               | 1.6                               | -0.1                           | 1.2                            |
| 7     | 35.9      | 22.4       | 10.6     | 1.0                              | 0.7                              | 1.3                               | 0.4                               | -0.3                           | 1.0                            |
| 8     | 15.0      | 6.4        | 5.4      | 2.4                              | 1.7                              | 2.9                               | 2.1                               | 0.0                            | 0.8                            |
| 9     | 8.4       | 4.2        | 2.8      | 2.8                              | 1.4                              | 3.0                               | 2.4                               | -0.2                           | 0.5                            |
| 10    | 10.7      | 8.1        | 5.0      | 2.7                              | 2.7                              | 2.7                               | 2.1                               | 0.1                            | 0.6                            |
| 11    | 5.7       | 3.8        | 3.5      | 3.3                              | 3.1                              | 3.4                               | 2.9                               | 0.2                            | 0.7                            |
| 12    | 2.5       | 4.7        | 2.4      | 3.2                              | 3.7                              | 2.2                               | 2.1                               | 0.4                            | 0.7                            |
| 13    | 2.1       | 3.7        | 1.9      | 1.9                              | 2.5                              | 1.2                               | 1.5                               | 0.2                            | 0.6                            |
| 14    | 2.5       | 4.8        | 1.8      | 2.5                              | 2.1                              | 1.6                               | 1.5                               | 0.0                            | 0.4                            |
| 15    | 2.0       | 3.6        | 1.5      | 1.0                              | 0.8                              | 0.4                               | 0.8                               | -0.2                           | 0.3                            |
| 16    | 1.1       | 2.0        | 0.9      | 0.5                              | 0.2                              | 0.0                               | 0.5                               | -0.2                           | 0.3                            |
| 17    | 2.0       | 3.7        | 1.7      | 0.4                              | 1.5                              | -0.1                              | 0.6                               | 0.2                            | 0.5                            |
| 18    | 1.8       | 3.3        | 1.4      | -0.9                             | -0.2                             | -1.1                              | -0.2                              | 0.0                            | 0.3                            |
| 19    | 1.2       | 2.1        | 1.0      | -1.4                             | -1.1                             | -1.4                              | -0.5                              | -0.2                           | 0.2                            |
| 20    | 3.0       | 4.4        | 2.9      | 2.7                              | 3.2                              | 2.3                               | 2.1                               | 0.2                            | 0.7                            |
| 21    | 1.2       | 2.0        | 2.2      | 2.9                              | 3.8                              | 2.3                               | 2.5                               | 0.3                            | 0.9                            |
| 22    | 0.8       | 1.7        | 1.6      | 0.2                              | 2.3                              | 0.0                               | 1.0                               | 0.3                            | 0.8                            |
| 23    | 0.6       | 1.1        | 1.1      | 0.3                              | 1.8                              | 0.2                               | 1.0                               | 0.3                            | 0.7                            |
| 24    | 1.5       | 2.8        | 1.5      | -1.8                             | -0.2                             | -1.8                              | -0.7                              | 0.1                            | 0.3                            |
| 25    | 1.3       | 2.2        | 1.3      | -2.8                             | -1.7                             | -2.4                              | -1.3                              | 0.0                            | 0.1                            |
| 26    | 1.3       | 2.0        | 1.1      | -2.7                             | -2.1                             | -2.4                              | -1.4                              | -0.2                           | 0.1                            |
| 27    | 1.2       | 2.5        | 1.6      | 0.6                              | 1.9                              | 0.0                               | 0.9                               | 0.0                            | 0.6                            |
| 28    | 0.7       | 0.6        | 1.3      | -2.4                             | -2.6                             | -0.9                              | -0.1                              | -0.1                           | 0.1                            |
| 29    | 4.9       | 7.7        | 3.0      | 2.3                              | 2.5                              | 1.8                               | 1.5                               | 0.0                            | 0.3                            |
| 30    | 4.3       | 5.7        | 2.2      | 2.2                              | 1.6                              | 1.7                               | 1.4                               | -0.2                           | 0.2                            |
| 31    | 3.8       | 5.2        | 2.1      | 0.8                              | 0.9                              | 0.4                               | 0.5                               | -0.1                           | 0.1                            |
| 32    | 1.4       | 3.3        | 1.8      | 1.7                              | 2.5                              | 1.4                               | 1.5                               | 0.2                            | 0.4                            |
| 33    | 1.9       | 2.8        | 1.8      | 1.6                              | 2.1                              | 1.3                               | 1.5                               | 0.1                            | 0.4                            |
| 34    | 1.5       | 2.6        | 1.3      | 1.4                              | 1.3                              | 1.0                               | 1.1                               | -0.1                           | 0.3                            |
| 35    | 1.0       | 1.9        | 1.4      | -0.4                             | 0.8                              | 0.0                               | 0.6                               | 0.1                            | 0.2                            |
| 36    | 0.9       | 1.3        | 1.0      | -1.4                             | -0.7                             | -0.9                              | -0.1                              | 0.0                            | 0.0                            |
| 37    | 0.9       | 1.0        | 0.9      | -2.5                             | -2.4                             | -2.0                              | -1.3                              | 0.0                            | -0.1                           |
| 38    | 1.8       | 2.1        | 1.3      | -0.7                             | -0.8                             | -0.6                              | -0.2                              | -0.1                           | -0.1                           |
| 39    | 1.4       | 1.3        | 2.6      | -0.1                             | 0.2                              | 0.1                               | 0.9                               | -0.4                           | -0.1                           |
| 40    | 0.1       | 0.1        | 0.2      | -2.9                             | -3.6                             | -2.2                              | -2.2                              | -1.8                           | -0.3                           |
| 41    | 0.8       | 0.5        | 1.0      | -3.2                             | -4.5                             | -2.1                              | -2.4                              | -0.2                           | -0.3                           |
| 42    | 0.9       | 0.5        | 1.1      | -3.2                             | -4.1                             | -2.1                              | -2.4                              | 0.0                            | -0.3                           |
| 43    | 0.9       | 0.7        | 1.0      | -3.2                             | -3.8                             | -2.4                              | -2.4                              | 0.0                            | -0.3                           |
| 44    | 0.9       | 0.7        | 1.1      | -3.1                             | -3.4                             | -2.4                              | -2.3                              | 0.1                            | -0.2                           |
| 45    | 0.9       | 0.6        | 1.1      | -2.4                             | -2.2                             | -1.3                              | -0.9                              | 0.1                            | -0.2                           |
| 46    | 0.9       | 1.3        | 1.8      | -1.3                             | -0.2                             | -0.8                              | -0.2                              | 0.2                            | 0.1                            |
| 47    | 0.9       | 0.7        | 1.1      | -3.1                             | -4.1                             | -2.1                              | -1.9                              | -0.1                           | -0.3                           |
| 48    | 0.7       | 0.4        | 1.0      | -2.6                             | -3.4                             | -1.5                              | -1.1                              | 0.1                            | -0.2                           |
| 49    | 2.4       | 1.5        | 4.0      | -3.1                             | -3.9                             | -2.1                              | -2.1                              | 0.2                            | -0.2                           |
| 50    | 6.9       | 4.7        | 14.1     | -2.9                             | -3.7                             | -1.3                              | -2.1                              | 0.1                            | -0.2                           |
| 51    | 57.1      | 33.0       | 133.4    | -2.6                             | -3.5                             | -2.0                              | -2.1                              | 0.1                            | -0.2                           |

**Supplementary Figure 30: Histone Deacetylase (HDAC) inhibition response enrichments.** For each chromatin state is shown the enrichment for H3K9ac, H4K16ac, PolII tags before HDAC inhibition (first group of columns) based on the data of (Wang et al, 2009)<sup>23</sup>. The next three pairs of columns show the log-base-2 fold change for these three marks at 2 hours and 8 hours after HDAC inhibition. The repressive promoter state (State 4) shows a notable increase in acetylation enrichment after HDAC inhibition, while repressive states 40-45 do not.

| state     | LINE | SINE | LTR  | DNA  | Simple_repeat | Low_complexity | Satellite | Other | snRNA | rRNA | tRNA | sprRNA | scRNA | Unknown | RNA  |
|-----------|------|------|------|------|---------------|----------------|-----------|-------|-------|------|------|--------|-------|---------|------|
| 1         | 0.3  | 0.6  | 0.4  | 0.5  | 0.6           | 0.5            | 0.1       | 0.0   | 3.6   | 0.5  | 6.0  | 0.1    | 0.9   | 1.1     | 0.5  |
| 2         | 0.4  | 0.7  | 0.6  | 0.7  | 0.9           | 0.6            | 0.1       | 0.1   | 1.1   | 0.7  | 4.8  | 0.5    | 2.4   | 1.6     | 0.7  |
| 3         | 0.3  | 0.7  | 0.4  | 0.5  | 1.4           | 1.8            | 0.3       | 0.0   | 0.9   | 1.0  | 15.0 | 1.1    | 1.5   | 0.5     | 0.1  |
| 4         | 0.1  | 0.3  | 0.2  | 0.2  | 2.6           | 5.0            | 0.8       | 0.1   | 0.5   | 1.1  | 13.9 | 0.6    | 0.2   | 0.0     | 0.0  |
| 5         | 0.1  | 0.4  | 0.1  | 0.2  | 4.4           | 9.1            | 0.2       | 0.0   | 1.7   | 0.4  | 20.5 | 0.8    | 0.4   | 0.4     | 0.6  |
| 6         | 0.1  | 0.3  | 0.1  | 0.2  | 1.8           | 3.7            | 0.2       | 0.0   | 2.5   | 0.3  | 19.7 | 2.2    | 0.6   | 0.0     | 0.1  |
| 7         | 0.1  | 0.2  | 0.1  | 0.2  | 0.9           | 1.8            | 0.1       | 0.0   | 2.7   | 0.0  | 6.4  | 1.2    | 0.6   | 0.0     | 0.8  |
| 8         | 0.2  | 0.4  | 0.1  | 0.3  | 1.3           | 2.6            | 0.1       | 0.0   | 0.2   | 1.2  | 0.3  | 0.3    | 2.5   | 2.2     | 0.0  |
| 9         | 0.4  | 0.8  | 0.2  | 0.6  | 1.3           | 2.1            | 0.0       | 0.1   | 1.8   | 0.3  | 0.2  | 0.1    | 1.1   | 0.0     | 1.1  |
| 10        | 0.3  | 0.7  | 0.2  | 0.5  | 0.7           | 0.4            | 0.0       | 0.1   | 0.6   | 3.5  | 0.6  | 1.2    | 0.5   | 0.0     | 1.9  |
| 11        | 0.4  | 0.8  | 0.2  | 0.6  | 0.9           | 0.6            | 0.1       | 0.0   | 0.5   | 3.3  | 0.6  | 0.2    | 2.9   | 1.2     | 0.0  |
| 12        | 0.5  | 0.8  | 0.5  | 0.8  | 0.6           | 0.2            | 0.0       | 0.0   | 0.3   | 2.6  | 0.8  | 1.9    | 0.7   | 0.8     | 2.0  |
| 13        | 0.7  | 1.1  | 0.6  | 1.3  | 0.7           | 0.4            | 0.0       | 0.1   | 1.1   | 3.5  | 0.5  | 2.7    | 1.5   | 0.7     | 3.3  |
| 14        | 0.7  | 1.2  | 0.7  | 1.2  | 0.8           | 0.8            | 0.1       | 0.1   | 1.3   | 1.3  | 0.4  | 3.5    | 1.4   | 0.4     | 1.5  |
| 15        | 1.0  | 1.5  | 0.5  | 1.5  | 0.8           | 0.9            | 0.0       | 0.5   | 2.5   | 1.7  | 0.8  | 2.1    | 3.1   | 0.1     | 1.3  |
| 16        | 1.0  | 2.4  | 0.4  | 1.2  | 1.0           | 1.2            | 0.0       | 2.0   | 2.2   | 0.9  | 0.7  | 1.4    | 2.6   | 0.3     | 0.9  |
| 17        | 0.8  | 0.9  | 0.8  | 1.2  | 0.8           | 0.4            | 0.0       | 0.1   | 0.7   | 1.9  | 0.5  | 2.8    | 1.6   | 0.0     | 2.0  |
| 18        | 0.9  | 1.3  | 0.8  | 1.5  | 0.8           | 0.7            | 0.0       | 0.7   | 1.5   | 1.3  | 0.8  | 3.2    | 2.0   | 0.1     | 1.0  |
| 19        | 1.1  | 1.9  | 0.6  | 1.3  | 1.0           | 1.1            | 0.0       | 3.5   | 2.0   | 0.8  | 0.8  | 1.4    | 2.1   | 0.2     | 0.6  |
| 20        | 0.5  | 0.8  | 0.5  | 0.7  | 1.1           | 0.4            | 0.1       | 0.0   | 0.4   | 0.4  | 1.2  | 0.8    | 1.2   | 0.3     | 0.5  |
| 21        | 0.3  | 0.8  | 0.3  | 0.5  | 1.4           | 0.7            | 0.2       | 0.1   | 0.9   | 0.5  | 0.9  | 1.2    | 1.2   | 0.0     | 0.1  |
| 22        | 0.4  | 0.7  | 0.4  | 0.6  | 0.9           | 0.5            | 0.1       | 0.6   | 0.5   | 0.7  | 0.6  | 1.3    | 1.5   | 0.0     | 0.0  |
| 23        | 0.4  | 1.6  | 0.3  | 0.6  | 1.3           | 1.0            | 0.3       | 3.9   | 0.7   | 0.7  | 0.6  | 1.2    | 1.4   | 0.3     | 0.7  |
| 24        | 0.7  | 0.9  | 0.7  | 1.1  | 0.6           | 0.5            | 0.2       | 0.4   | 1.1   | 1.5  | 1.3  | 2.2    | 1.2   | 0.0     | 2.7  |
| 25        | 0.7  | 1.1  | 0.7  | 1.3  | 0.7           | 0.9            | 0.1       | 0.3   | 1.4   | 1.2  | 1.2  | 1.5    | 1.6   | 0.1     | 1.7  |
| 26        | 0.9  | 1.6  | 0.5  | 1.2  | 0.9           | 1.2            | 0.1       | 2.1   | 1.7   | 1.1  | 1.0  | 1.2    | 2.3   | 0.2     | 0.9  |
| 27        | 0.4  | 1.4  | 0.3  | 1.1  | 0.7           | 0.9            | 0.0       | 0.3   | 2.2   | 1.3  | 1.3  | 2.7    | 2.3   | 0.0     | 0.5  |
| 28        | 1.1  | 1.3  | 1.4  | 0.9  | 0.7           | 0.7            | 0.7       | 0.3   | 1.1   | 4.2  | 1.3  | 0.0    | 2.1   | 0.0     | 0.0  |
| 29        | 0.5  | 0.9  | 0.8  | 0.9  | 0.8           | 0.4            | 0.1       | 0.0   | 0.6   | 0.9  | 1.8  | 1.5    | 1.3   | 1.3     | 1.4  |
| 30        | 0.6  | 1.2  | 0.8  | 1.0  | 1.0           | 1.0            | 0.2       | 0.1   | 1.7   | 2.9  | 1.5  | 1.6    | 2.8   | 2.6     | 1.3  |
| 31        | 0.5  | 0.8  | 1.1  | 1.1  | 0.7           | 0.5            | 0.1       | 0.1   | 1.1   | 0.8  | 2.8  | 1.4    | 1.2   | 2.0     | 1.4  |
| 32        | 0.5  | 0.9  | 1.0  | 0.9  | 1.0           | 0.5            | 0.1       | 0.1   | 0.2   | 0.4  | 0.2  | 2.1    | 0.7   | 0.7     | 4.0  |
| 33        | 0.6  | 1.2  | 0.8  | 1.1  | 1.3           | 0.8            | 0.1       | 0.1   | 1.1   | 1.0  | 1.2  | 2.0    | 1.8   | 0.1     | 1.5  |
| 34        | 0.7  | 1.8  | 0.8  | 1.1  | 1.2           | 1.2            | 0.1       | 0.5   | 1.9   | 0.9  | 0.9  | 1.5    | 2.5   | 0.4     | 1.3  |
| 35        | 0.6  | 1.0  | 1.2  | 1.0  | 0.9           | 0.5            | 0.1       | 0.1   | 0.7   | 1.3  | 0.7  | 1.4    | 1.4   | 1.1     | 1.9  |
| 36        | 0.8  | 1.6  | 1.1  | 1.2  | 1.2           | 0.8            | 0.1       | 1.1   | 1.2   | 1.1  | 1.0  | 2.1    | 1.6   | 1.0     | 1.1  |
| 37        | 1.1  | 1.5  | 1.1  | 1.2  | 1.1           | 0.9            | 0.3       | 2.2   | 1.5   | 1.3  | 1.1  | 1.9    | 1.7   | 0.8     | 0.9  |
| 38        | 0.7  | 1.0  | 1.2  | 1.2  | 0.9           | 0.8            | 0.3       | 0.3   | 1.2   | 1.1  | 1.7  | 1.4    | 1.4   | 1.4     | 1.8  |
| 39        | 0.5  | 0.9  | 0.6  | 1.1  | 1.1           | 1.0            | 0.3       | 0.2   | 1.2   | 0.6  | 2.8  | 1.0    | 1.6   | 0.3     | 0.7  |
| 40        | 0.6  | 0.4  | 0.6  | 0.4  | 0.5           | 0.5            | 1.1       | 0.5   | 0.5   | 0.4  | 0.7  | 0.6    | 0.4   | 0.3     | 0.4  |
| 41        | 1.3  | 0.7  | 1.3  | 1.0  | 1.1           | 1.4            | 0.7       | 0.4   | 0.6   | 0.7  | 0.7  | 0.3    | 0.3   | 1.3     | 1.0  |
| 42        | 1.1  | 0.6  | 1.5  | 1.0  | 1.1           | 1.1            | 1.0       | 0.4   | 0.5   | 1.0  | 0.8  | 0.6    | 0.3   | 1.4     | 1.4  |
| 43        | 1.1  | 1.1  | 1.1  | 1.2  | 1.1           | 0.9            | 0.2       | 1.1   | 1.0   | 1.0  | 0.8  | 0.9    | 0.9   | 1.7     | 1.2  |
| 44        | 0.8  | 0.9  | 1.3  | 1.1  | 1.2           | 0.7            | 0.3       | 0.6   | 0.7   | 1.2  | 0.8  | 1.0    | 0.6   | 1.3     | 1.6  |
| 45        | 0.7  | 1.0  | 0.9  | 1.0  | 1.2           | 1.1            | 0.2       | 0.5   | 0.9   | 0.8  | 2.6  | 0.7    | 0.8   | 1.0     | 1.3  |
| 46        | 0.4  | 0.5  | 0.6  | 0.5  | 13.9          | 0.4            | 0.8       | 3.3   | 0.6   | 4.3  | 0.1  | 0.3    | 0.1   | 0.0     | 1.0  |
| 47        | 1.8  | 0.7  | 1.6  | 1.0  | 0.8           | 0.7            | 0.5       | 0.6   | 1.4   | 0.9  | 2.8  | 0.7    | 1.7   | 0.8     | 1.0  |
| 48        | 1.0  | 0.8  | 1.2  | 0.6  | 0.8           | 0.6            | 63.4      | 3.1   | 0.5   | 5.5  | 1.1  | 0.9    | 0.4   | 0.0     | 0.4  |
| 49        | 0.4  | 0.3  | 0.5  | 0.5  | 1.3           | 0.5            | 138       | 0.3   | 0.8   | 17.2 | 1.7  | 1.1    | 0.0   | 0.0     | 1.0  |
| 50        | 0.2  | 0.4  | 0.3  | 0.3  | 2.9           | 0.4            | 158       | 0.6   | 0.9   | 47.9 | 6.7  | 0.0    | 0.0   | 0.0     | 2.7  |
| 51        | 0.2  | 0.3  | 0.3  | 0.3  | 1.3           | 0.8            | 159       | 0.0   | 0.0   | 365  | 12.2 | 0.0    | 0.0   | 0.0     | 0.0  |
| % Overall | 26.8 | 21.7 | 11.2 | 5.03 | 3.29          | 2.82           | 0.42      | 0.15  | 0.04  | 0.02 | 0.02 | 0.01   | 0.01  | 0.01    | 0.01 |

| state | LINE: L1 | LINE: L2 | LINE: CR1 | LINE: RTE | SINE: Alu | SINE: MIR | LTR: MaLR | LTR: ERVL | LTR: ERVK | LTR: ERV1 | Satellite: centr | Satellite: Satellite | Satellite: telo | Satellite: acro | Simple_repeat: (TG)n | Simple_repeat: (CA)n | Simple_repeat: (CATG)n | Low_complexity: GC_rich |
|-------|----------|----------|-----------|-----------|-----------|-----------|-----------|-----------|-----------|-----------|------------------|----------------------|-----------------|-----------------|----------------------|----------------------|------------------------|-------------------------|
| 1     | 0.1      | 1.0      | 0.9       | 0.3       | 0.2       | 1.8       | 0.3       | 0.4       | 0.3       | 0.0       | 0.0              | 0.2                  | 0.0             | 0.0             | 0.9                  | 0.9                  | 0.0                    | 4.8                     |
| 2     | 0.2      | 1.2      | 0.8       | 0.5       | 0.3       | 1.6       | 0.4       | 0.6       | 0.5       | 2.2       | 0.0              | 0.3                  | 1.0             | 0.0             | 1.4                  | 1.2                  | 0.4                    | 5.0                     |
| 3     | 0.2      | 0.7      | 0.5       | 0.5       | 0.5       | 1.2       | 0.2       | 0.4       | 0.6       | 0.9       | 0.2              | 0.4                  | 2.1             | 0.0             | 1.4                  | 1.3                  | 0.3                    | 25.0                    |
| 4     | 0.1      | 0.3      | 0.3       | 0.2       | 0.2       | 0.6       | 0.1       | 0.1       | 0.3       | 0.0       | 0.6              | 0.7                  | 7.3             | 0.0             | 1.7                  | 1.7                  | 0.7                    | 103.9                   |
| 5     | 0.1      | 0.2      | 0.1       | 0.1       | 0.5       | 0.3       | 0.0       | 0.1       | 0.4       | 0.6       | 0.1              | 0.3                  | 2.7             | 0.0             | 0.6                  | 0.6                  | 0.0                    | 197.1                   |
| 6     | 0.1      | 0.3      | 0.2       | 0.2       | 0.3       | 0.5       | 0.0       | 0.1       | 0.2       | 0.6       | 0.0              | 0.4                  | 1.1             | 0.0             | 0.6                  | 0.7                  | 0.3                    | 82.5                    |
| 7     | 0.0      | 0.2      | 0.1       | 0.1       | 0.1       | 0.5       | 0.0       | 0.0       | 0.1       | 1.7       | 0.0              | 0.3                  | 0.0             | 0.0             | 0.3                  | 0.4                  | 0.0                    | 39.7                    |
| 8     | 0.1      | 0.4      | 0.6       | 0.6       | 0.2       | 1.0       | 0.1       | 0.1       | 0.1       | 0.0       | 0.0              | 0.3                  | 0.0             | 0.0             | 0.8                  | 0.9                  | 0.8                    | 54.3                    |
| 9     | 0.3      | 0.6      | 0.9       | 0.9       | 0.7       | 1.1       | 0.1       | 0.1       | 0.1       | 0.0       | 0.0              | 0.1                  | 0.0             | 0.0             | 0.8                  | 1.1                  | 0.0                    | 28.8                    |
| 10    | 0.1      | 1.2      | 1.3       | 0.4       | 0.1       | 2.1       | 0.2       | 0.2       | 0.1       | 0.1       | 0.0              | 0.1                  | 0.0             | 0.0             | 1.4                  | 1.6                  | 7.1                    | 4.1                     |
| 11    | 0.1      | 1.2      | 1.1       | 0.5       | 0.4       | 1.9       | 0.2       | 0.3       | 0.1       | 2.5       | 0.0              | 0.2                  | 0.1             | 0.0             | 1.5                  | 1.4                  | 10.6                   | 5.2                     |
| 12    | 0.2      | 1.8      | 1.4       | 0.7       | 0.3       | 2.3       | 0.7       | 0.6       | 0.0       | 1.5       | 0.0              | 0.0                  | 0.4             | 0.0             | 1.0                  | 1.2                  | 1.7                    | 0.1                     |
| 13    | 0.4      | 1.8      | 1.3       | 0.9       | 0.9       | 1.7       | 0.7       | 0.7       | 0.2       | 0.7       | 0.0              | 0.0                  | 0.0             | 0.0             | 1.1                  | 1.0                  | 1.3                    | 0.3                     |
| 14    | 0.5      | 1.5      | 1.6       | 1.2       | 1.1       | 1.5       | 0.8       | 0.7       | 0.3       | 0.3       | 0.0              | 0.1                  | 0.3             | 0.0             | 0.9                  | 0.7                  | 0.0                    | 0.2                     |
| 15    | 0.9      | 1.1      | 1.2       | 1.3       | 1.7       | 1.1       | 0.5       | 0.3       | 0.4       | 0.5       | 0.0              | 0.0                  | 0.0             | 0.0             | 0.7                  | 0.7                  | 0.5                    | 0.2                     |
| 16    | 1.1      | 0.7      | 0.8       | 0.9       | 3.1       | 0.7       | 0.4       | 0.2       | 0.7       | 0.6       | 0.0              | 0.0                  | 0.0             | 0.0             | 0.8                  | 0.7                  | 0.0                    | 0.2                     |
| 17    | 0.4      | 2.1      | 1.3       | 0.7       | 0.6       | 1.7       | 0.9       | 1.0       | 0.2       | 2.1       | 0.0              | 0.1                  | 0.2             | 0.0             | 1.7                  | 1.4                  | 5.2                    | 0.2                     |
| 18    | 0.7      | 1.7      | 1.4       | 1.2       | 1.3       | 1.4       | 0.8       | 0.7       | 0.4       | 1.0       | 0.0              | 0.0                  | 0.1             | 0.0             | 0.9                  | 0.8                  | 0.9                    | 0.1                     |
| 19    | 1.1      | 0.9      | 1.0       | 1.2       | 2.3       | 0.9       | 0.5       | 0.3       | 0.8       | 0.7       | 0.0              | 0.0                  | 0.1             | 0.0             | 0.7                  | 0.8                  | 0.2                    | 0.1                     |
| 20    | 0.1      | 1.5      | 1.3       | 0.8       | 0.3       | 2.0       | 0.5       | 0.8       | 0.3       | 0.1       | 0.0              | 0.4                  | 0.3             | 0.0             | 2.8                  | 2.1                  | 2.8                    | 1.8                     |
| 21    | 0.1      | 1.1      | 0.6       | 0.4       | 0.6       | 1.6       | 0.3       | 0.3       | 0.2       | 0.7       | 0.0              | 0.6                  | 1.6             | 0.0             | 2.7                  | 2.5                  | 4.3                    | 6.4                     |
| 22    | 0.2      | 1.0      | 0.7       | 0.5       | 0.6       | 1.2       | 0.4       | 0.3       | 0.1       | 0.9       | 0.0              | 0.3                  | 0.9             | 0.0             | 1.3                  | 1.4                  | 4.4                    | 2.2                     |
| 23    | 0.3      | 0.8      | 0.5       | 0.4       | 1.8       | 1.0       | 0.3       | 0.3       | 0.5       | 0.8       | 0.0              | 0.7                  | 1.9             | 0.0             | 1.0                  | 1.0                  | 2.6                    | 5.9                     |
| 24    | 0.4      | 1.6      | 1.3       | 1.0       | 0.7       | 1.5       | 0.8       | 0.9       | 0.3       | 0.4       | 0.0              | 0.6                  | 0.1             | 0.0             | 0.8                  | 0.9                  | 1.5                    | 0.1                     |
| 25    | 0.6      | 1.1      | 1.1       | 1.2       | 1.1       | 1.1       | 0.8       | 0.7       | 0.9       | 0.4       | 0.0              | 0.4                  | 0.0             | 0.0             | 0.6                  | 0.7                  | 0.4                    | 0.0                     |
| 26    | 0.9      | 1.0      | 1.1       | 1.2       | 1.9       | 0.9       | 0.5       | 0.4       | 0.8       | 0.4       | 0.0              | 0.2                  | 0.1             | 0.0             | 0.7                  | 0.7                  | 0.3                    | 0.1                     |
| 27    | 0.3      | 0.8      | 0.8       | 0.8       | 1.5       | 1.0       | 0.3       | 0.3       | 0.4       | 0.6       | 0.0              | 0.1                  | 0.4             | 0.0             | 0.5                  | 0.6                  | 0.0                    | 0.7                     |
| 28    | 1.2      | 0.7      | 0.3       | 0.7       | 1.6       | 0.4       | 0.9       | 1.4       | 5.8       | 1.9       | 0.9              | 0.2                  | 0.5             | 13.6            | 0.6                  | 0.7                  | 0.0                    | 0.0                     |
| 29    | 0.1      | 1.6      | 1.3       | 1.2       | 0.4       | 2.2       | 0.9       | 1.0       | 0.3       | 1.0       | 0.0              | 0.2                  | 0.0             | 0.0             | 1.1                  | 1.3                  | 0.2                    | 0.3                     |
| 30    | 0.4      | 1.3      | 1.4       | 1.5       | 1.0       | 1.6       | 0.7       | 0.6       | 0.6       | 2.5       | 0.2              | 0.3                  | 0.0             | 0.0             | 1.1                  | 1.1                  | 0.2                    | 1.1                     |
| 31    | 0.3      | 1.5      | 1.4       | 0.9       | 0.4       | 1.8       | 1.0       | 1.3       | 0.5       | 1.3       | 0.0              | 0.3                  | 0.4             | 0.0             | 1.2                  | 1.1                  | 0.5                    | 0.6                     |
| 32    | 0.2      | 1.7      | 1.3       | 0.9       | 0.5       | 2.1       | 1.1       | 1.3       | 0.2       | 0.9       | 0.0              | 0.2                  | 0.0             | 0.0             | 1.9                  | 1.8                  | 2.6                    | 0.2                     |
| 33    | 0.3      | 1.5      | 1.2       | 0.9       | 1.1       | 1.8       | 0.8       | 1.0       | 0.5       | 0.8       | 0.0              | 0.2                  | 1.0             | 0.0             | 2.1                  | 1.8                  | 2.1                    | 1.3                     |

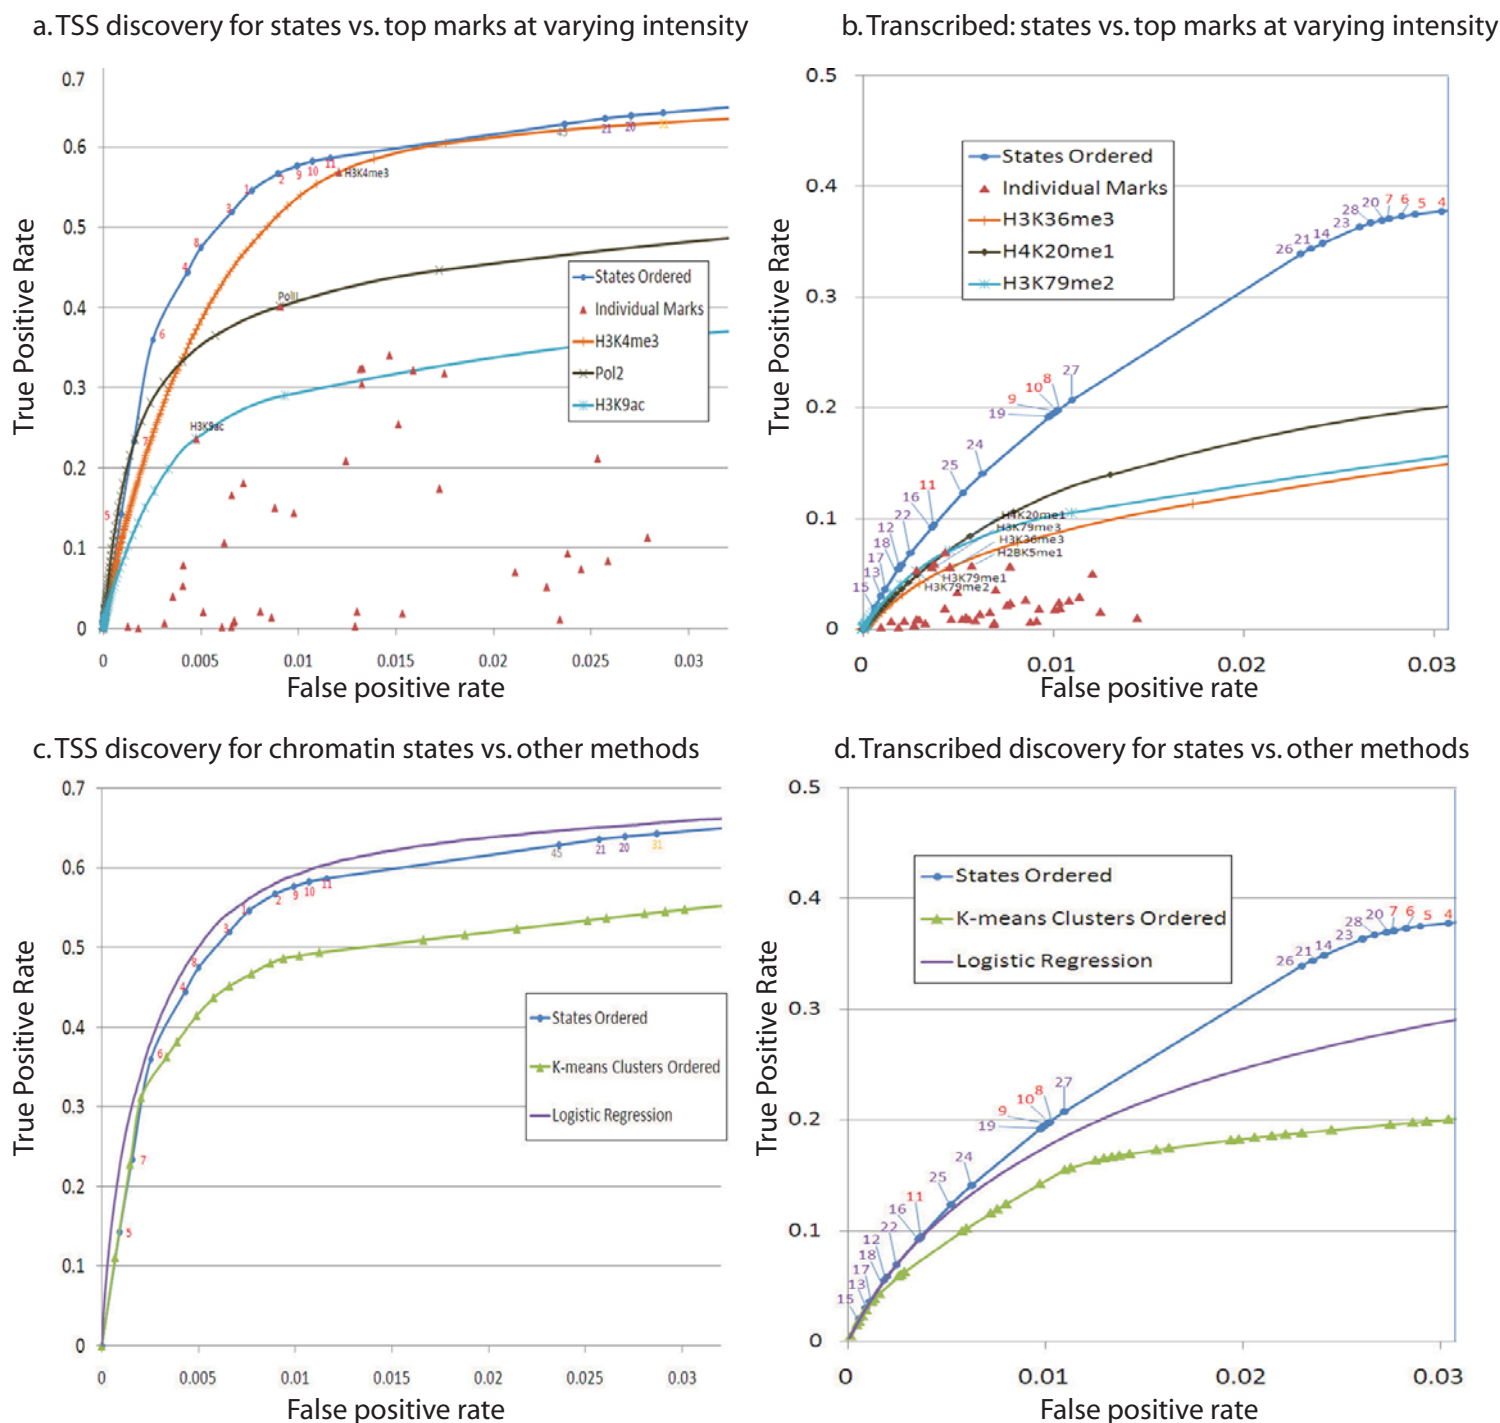

**Supplementary Figure 32: Comparison of TSS recovery with individual marks at varying intensity thresholds, k-means, and logistic regression.** a-d. Receiver Operating Characteristic (ROC) curves for recovery of RefSeq Transcription Start Sites (TSS) and RefSeq Transcribed Regions for chromatin states, best-performing chromatin marks at varying read-count signal intensity thresholds, and two alternate methods: a 51-cluster k-means clustering (green) of the same binarized input features used by chromatin states, but without any spatial information (also ordered by their TSS enrichment), and a supervised learning logistic regression classifier (purple) given chromatin mark signal intensity information and labeled gene annotation data but lacking spatial information. **a. TSS recovery for chromatin states and individual chromatin marks.** ROC curves shown for the three top-performing marks at all varying intensity levels obtained by varying thresholds in the number of reads within a bin necessary for a presence call for a given mark. Even though H3K4me3 performs similar to chromatin states at a 1% false positive rate, it significantly underperforms states at more stringent false positive rates (20% lower true positive rate at a false positive rate of 0.5%). **b. Transcribed region recovery for chromatin states and individual chromatin marks.** ROC curves shown for chromatin states and the top three chromatin marks at varying intensity thresholds. No single mark performs comparably to chromatin states that are able to use both combinations of marks and spatial context information. **c. TSS recovery for chromatin states and alternative methods.** Chromatin states outperform a k-means clustering approach, showing that even for the identification of TSS that are very punctate, spatial context information can play an important role, likely capturing transitions between upstream and downstream promoter states. We also compared to logistic regression, a supervised classifier that specifically learns predictive chromatin combinations by training on known TSS, while our chromatin states were learned de novo without any previous annotation information. Logistic regression slightly out-performed chromatin states (~3% increase in performance), benefiting from the supervised learning approach, and also having access to mark the full spectrum of mark intensity information. **d. Transcribed region recovery for chromatin states and alternate methods.** In contrast to TSS, transcribed regions are much harder to recover without spatial information, and chromatin states strongly outperform both k-means clustering and logistic regression with locally defined features.

a.

| state   | % RefSeq | % EST |    | % EST for non-RefSeq |     | Lin et al, Exons |  | Lin et al, Exons   Not RefSeq Exon |  |
|---------|----------|-------|----|----------------------|-----|------------------|--|------------------------------------|--|
| 1       | 45       | 82    | 68 | 2                    | 3   |                  |  |                                    |  |
| 2       | 44       | 77    | 61 | 2                    | 3   |                  |  |                                    |  |
| 3       | 49       | 79    | 61 | 4                    | 6   |                  |  |                                    |  |
| 4       | 52       | 80    | 62 | 6                    | 14  |                  |  |                                    |  |
| 5       | 63       | 90    | 75 | 5                    | 11  |                  |  |                                    |  |
| 6       | 61       | 91    | 78 | 6                    | 6   |                  |  |                                    |  |
| 7       | 70       | 96    | 86 | 8                    | 6   |                  |  |                                    |  |
| 8       | 87       | 98    | 85 | 5                    | 4   |                  |  |                                    |  |
| 9       | 89       | 98    | 87 | 3                    | 2   |                  |  |                                    |  |
| 10      | 87       | 97    | 80 | 4                    | 2   |                  |  |                                    |  |
| 11      | 92       | 98    | 89 | 4                    | 2   |                  |  |                                    |  |
| 12      | 93       | 97    | 79 | 2                    | 1   |                  |  |                                    |  |
| 13      | 95       | 99    | 91 | 2                    | 1   |                  |  |                                    |  |
| 14      | 82       | 94    | 69 | 2                    | 1   |                  |  |                                    |  |
| 15      | 95       | 99    | 92 | 1                    | 0   |                  |  |                                    |  |
| 16      | 92       | 98    | 84 | 1                    | 0   |                  |  |                                    |  |
| 17      | 94       | 99    | 85 | 2                    | 1   |                  |  |                                    |  |
| 18      | 93       | 99    | 85 | 2                    | 1   |                  |  |                                    |  |
| 19      | 89       | 97    | 79 | 1                    | 0   |                  |  |                                    |  |
| 20      | 70       | 87    | 58 | 3                    | 2   |                  |  |                                    |  |
| 21      | 83       | 93    | 67 | 9                    | 5   |                  |  |                                    |  |
| 22      | 92       | 98    | 82 | 11                   | 7   |                  |  |                                    |  |
| 23      | 81       | 93    | 68 | 7                    | 5   |                  |  |                                    |  |
| 24      | 90       | 97    | 74 | 6                    | 3   |                  |  |                                    |  |
| 25      | 91       | 97    | 73 | 8                    | 2   |                  |  |                                    |  |
| 26      | 86       | 95    | 70 | 3                    | 1   |                  |  |                                    |  |
| 27      | 88       | 96    | 72 | 8                    | 2   |                  |  |                                    |  |
| 28      | 77       | 96    | 86 | 2                    | 2   |                  |  |                                    |  |
| 29      | 44       | 71    | 51 | 2                    | 1   |                  |  |                                    |  |
| 30      | 46       | 74    | 54 | 1                    | 1   |                  |  |                                    |  |
| 31      | 32       | 65    | 50 | 1                    | 1   |                  |  |                                    |  |
| 32      | 42       | 67    | 46 | 2                    | 2   |                  |  |                                    |  |
| 33      | 51       | 75    | 52 | 2                    | 2   |                  |  |                                    |  |
| 34      | 52       | 77    | 55 | 1                    | 1   |                  |  |                                    |  |
| 35      | 34       | 62    | 45 | 2                    | 2   |                  |  |                                    |  |
| 36      | 33       | 61    | 45 | 1                    | 2   |                  |  |                                    |  |
| 37      | 38       | 65    | 47 | 1                    | 1   |                  |  |                                    |  |
| 38      | 32       | 61    | 45 | 1                    | 1   |                  |  |                                    |  |
| 39      | 37       | 64    | 46 | 1                    | 1   |                  |  |                                    |  |
| 40      | 10       | 25    | 19 | 0                    | 0   |                  |  |                                    |  |
| 41      | 22       | 46    | 33 | 0                    | 0   |                  |  |                                    |  |
| 42      | 23       | 47    | 34 | 0                    | 0   |                  |  |                                    |  |
| 43      | 33       | 58    | 41 | 1                    | 1   |                  |  |                                    |  |
| 44      | 34       | 59    | 41 | 1                    | 2   |                  |  |                                    |  |
| 45      | 34       | 60    | 43 | 1                    | 2   |                  |  |                                    |  |
| 46      | 42       | 63    | 41 | 2                    | 2   |                  |  |                                    |  |
| 47      | 29       | 57    | 42 | 0                    | 1   |                  |  |                                    |  |
| 48      | 17       | 52    | 44 | 0                    | 1   |                  |  |                                    |  |
| 49      | 9        | 40    | 34 | 0                    | 0   |                  |  |                                    |  |
| 50      | 6        | 42    | 38 | 0                    | 0   |                  |  |                                    |  |
| 51      | 6        | 47    | 43 | 1                    | 0   |                  |  |                                    |  |
| Overall | 36       | 58    | 37 | 2.0                  | 0.1 |                  |  |                                    |  |

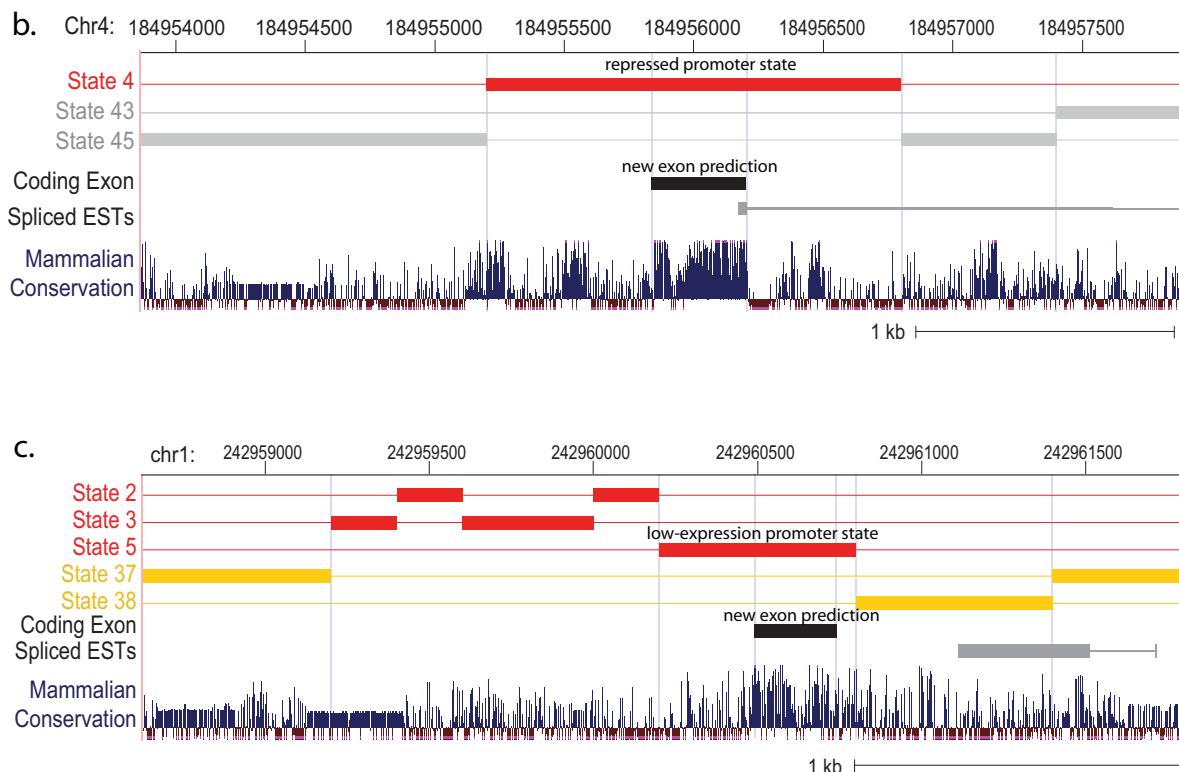

**Supplementary Figure 33: Overlap with Expressed Sequence Tags (ESTs) and Predicted New Exons.** Independent experimental and comparative information provides support that a significant fraction of false positives in Figures 5a and 5b are genuine novel unannotated TSS and transcribed regions currently missing from RefSeq. **a.** In the left table, for each state is shown the percentage of the state falling within a RefSeq annotated transcribed region. In the center table is the percentage of 200 bp intervals associated with a state intersecting expressed sequence tag (EST), and the percentage of the state that overlaps with EST data when restricting to RefSeq transcribed regions. Bottom row indicates the genome-wide percentages of these quantities. This table shows that chromatin states are predictive of function even outside known annotations, and many non-RefSeq-annotated regions falling in transcribed states are indeed supported by EST data for being transcriptionally active. In the right table are fold enrichment for protein-coding exons predicted by evolution conservation using 29 mammals (Lin and Kellis, in preparation), and the same fold enrichment specifically outside RefSeq exons. The shift in enrichment from transcribed states (states 21-27) to repressed and low-expression promoter states (state 4 and 5) suggests that novel exons missing from RefSeq are likely to be short and of low expression. **b.** Example of candidate novel exon repressed in CD4 T-cells. Highly-conserved protein-coding exon (black) is annotated in repressed promoter state 4 (red) and surrounded by repressed states (grey), likely due to its short length and repression in CD4 T-cells. **c.** Example of candidate novel exon active in CD4 T-cells. This evolutionarily-predicted new protein-coding exon (black) lies in a low-expression promoter state (state 5) and is associated with several other promoter states (2 and 3) and flanked by active intergenic regions.

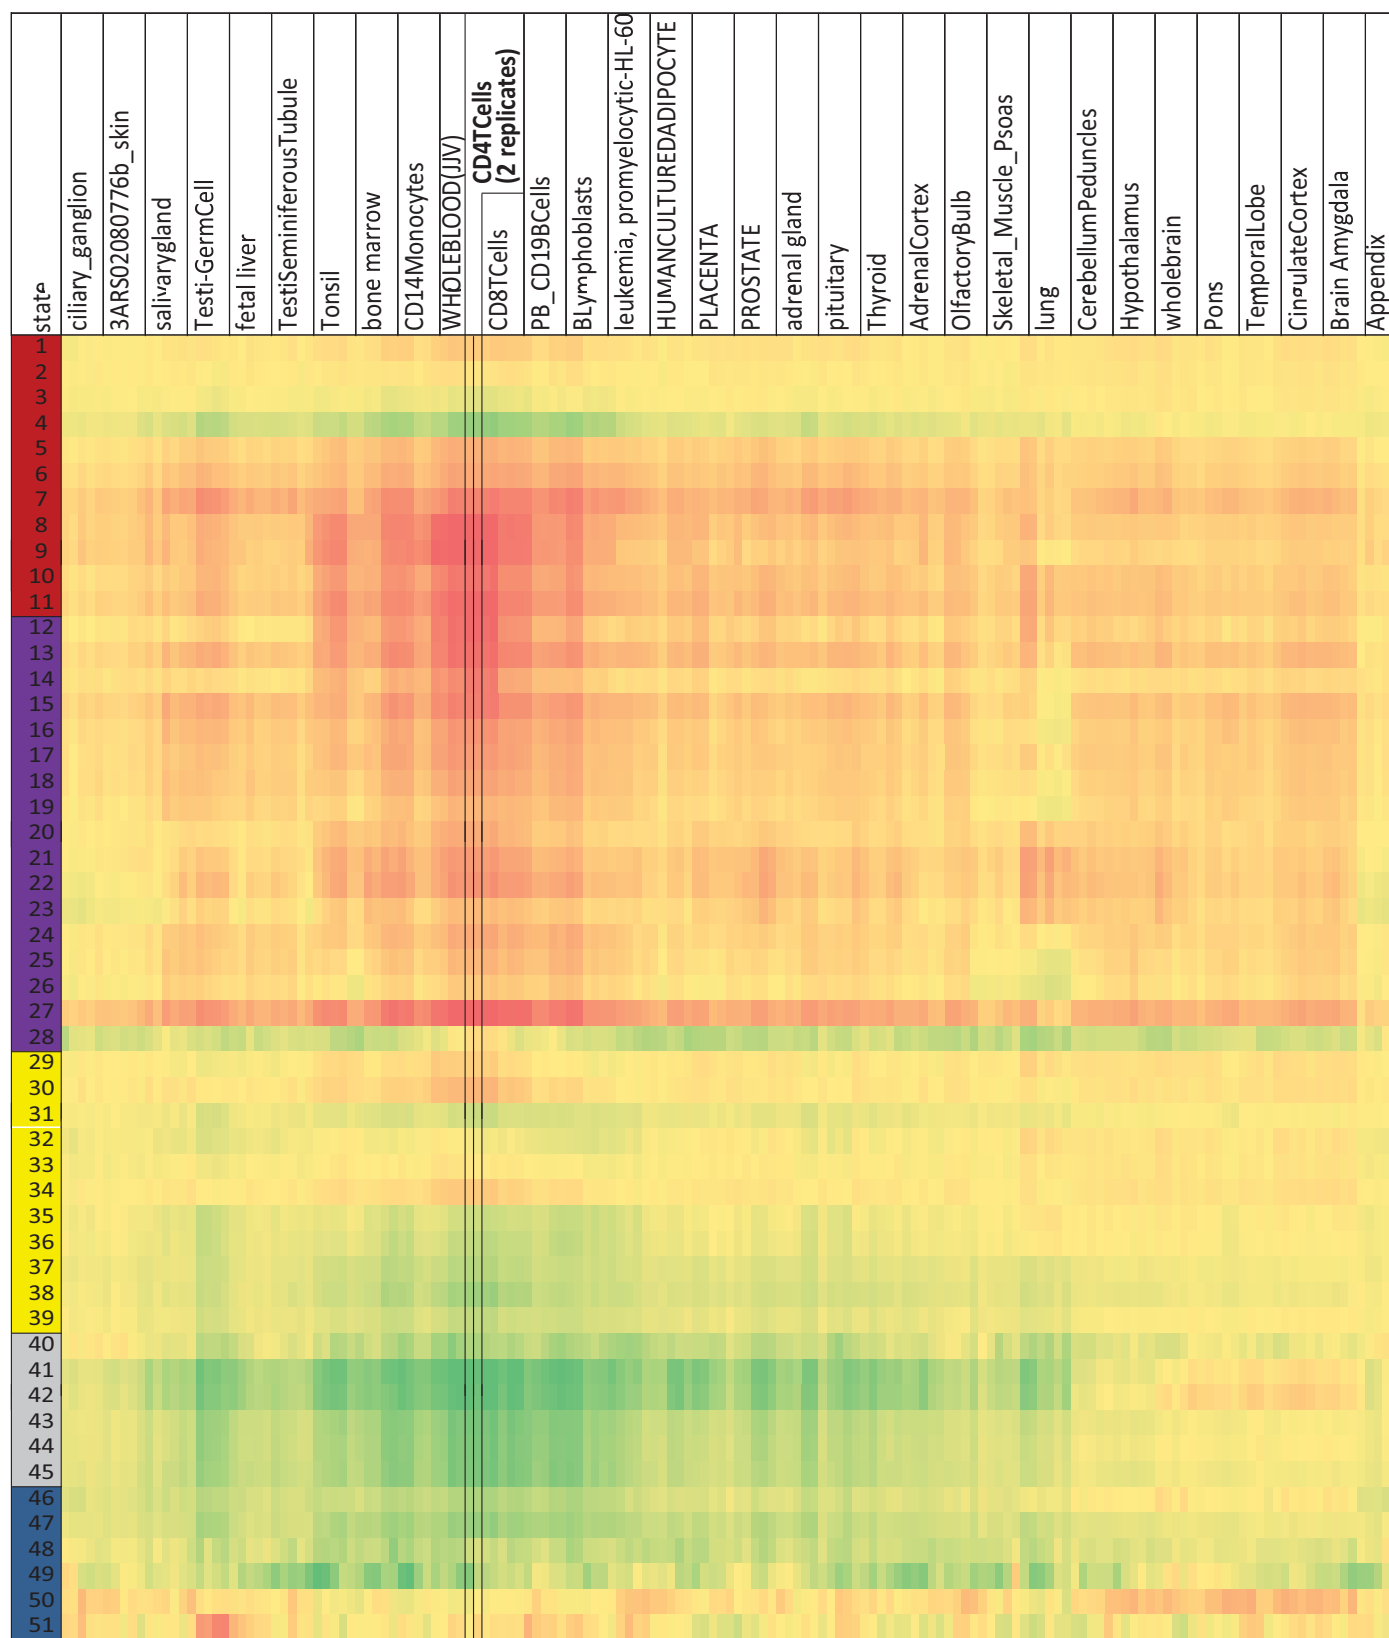

158 microarray experiments, clustered  
(only every 5th name shown)

**Supplementary Figure 34: Expression enrichments for numerous cell types.** Average expression level corresponding to each state across 158 microarray experiments<sup>7</sup>. Experiments are clustered hierarchically and ordered based on the optimal leaf ordering<sup>5</sup>. The name of every fifth experiment is listed for compactness. The two CD4 T experiments are boxed and marked. Heatmap shows that the chromatin states defined here based on CD4 T chromatin marks show the highest and lowest expression levels in CD4 T and related cell types. Average expression levels of each state were computed as described for the CD4 T data in the Online Methods section, but all replicates were kept separate.

| state     | Transcript top 2000 | Transcript bottom 2000 | 5' end top 2000 | 5' end bottom 2000 |
|-----------|---------------------|------------------------|-----------------|--------------------|
| 1         | 0.8                 | 1.4                    | 14.4            | 8.7                |
| 2         | 0.5                 | 1.8                    | 6.4             | 6.5                |
| 3         | 0.4                 | 2.6                    | 5.9             | 21.0               |
| 4         | 0.3                 | 4.5                    | 4.8             | 59.4               |
| 5         | 2.0                 | 1.8                    | 131.0           | 41.8               |
| 6         | 1.8                 | 1.4                    | 140.2           | 27.1               |
| 7         | 3.2                 | 1.0                    | 210.7           | 20.7               |
| 8         | 8.1                 | 1.1                    | 169.7           | 7.5                |
| 9         | 9.9                 | 1.0                    | 39.1            | 5.0                |
| 10        | 5.5                 | 1.9                    | 17.5            | 2.1                |
| 11        | 7.0                 | 1.4                    | 9.1             | 2.5                |
| 12        | 7.3                 | 2.4                    | 5.0             | 0.6                |
| 13        | 6.5                 | 1.9                    | 3.8             | 0.8                |
| 14        | 4.6                 | 1.4                    | 2.1             | 0.4                |
| 15        | 5.0                 | 1.6                    | 1.6             | 0.4                |
| 16        | 3.3                 | 1.6                    | 0.9             | 0.3                |
| 17        | 3.0                 | 2.4                    | 1.2             | 0.4                |
| 18        | 2.4                 | 2.0                    | 0.9             | 0.3                |
| 19        | 1.7                 | 2.0                    | 0.6             | 0.5                |
| 20        | 1.9                 | 1.8                    | 2.8             | 3.1                |
| 21        | 3.4                 | 2.1                    | 6.5             | 3.3                |
| 22        | 3.8                 | 2.6                    | 4.6             | 2.1                |
| 23        | 1.9                 | 2.9                    | 1.4             | 3.5                |
| 24        | 2.1                 | 1.7                    | 1.1             | 1.0                |
| 25        | 1.5                 | 1.7                    | 0.9             | 0.8                |
| 26        | 1.0                 | 2.0                    | 0.6             | 0.8                |
| 27        | 8.6                 | 0.9                    | 8.8             | 1.6                |
| 28        | 0.5                 | 0.9                    | 1.8             | 1.7                |
| 29        | 1.0                 | 1.8                    | 0.7             | 1.1                |
| 30        | 1.4                 | 1.5                    | 1.7             | 1.3                |
| 31        | 0.3                 | 2.1                    | 0.7             | 2.3                |
| 32        | 0.3                 | 1.9                    | 0.3             | 1.2                |
| 33        | 0.6                 | 2.2                    | 0.5             | 1.6                |
| 34        | 1.0                 | 1.7                    | 0.7             | 1.4                |
| 35        | 0.2                 | 2.1                    | 0.1             | 1.5                |
| 36        | 0.2                 | 2.2                    | 0.1             | 1.3                |
| 37        | 0.2                 | 2.6                    | 0.1             | 1.0                |
| 38        | 0.1                 | 2.5                    | 0.1             | 1.8                |
| 39        | 0.3                 | 2.6                    | 0.4             | 1.5                |
| 40        | 0.2                 | 1.1                    | 0.3             | 0.5                |
| 41        | 0.0                 | 1.9                    | 0.0             | 0.2                |
| 42        | 0.0                 | 1.9                    | 0.0             | 0.3                |
| 43        | 0.1                 | 3.1                    | 0.0             | 0.7                |
| 44        | 0.1                 | 3.2                    | 0.0             | 0.9                |
| 45        | 0.1                 | 3.0                    | 0.1             | 4.6                |
| 46        | 0.2                 | 3.5                    | 0.0             | 1.2                |
| 47        | 0.1                 | 2.0                    | 0.0             | 0.4                |
| 48        | 0.1                 | 0.6                    | 0.2             | 1.1                |
| 49        | 0.1                 | 0.4                    | 0.0             | 1.0                |
| 50        | 0.1                 | 0.5                    | 0.0             | 0.0                |
| 51        | 0.1                 | 0.5                    | 0.0             | 0.0                |
| % Overall | 1.53                | 3.36                   | 0.011           | 0.012              |

**Supplementary Figure 35: State enrichments for most expressed and most repressed genes.** For each state is shown the enrichment for the 2000 affymetrix probe sets with the highest and lowest expression in CD4 T cells<sup>7</sup>, and the enrichments based only on the intervals which intersect a 5' end of a probe set. The bottom row indicates the percentage of 200 bp intervals each category represents. The figure indicates that both highly- and lowly-expressed genes show specific state enrichments, though these were stronger for genes of higher expression. The genomic coordinates of probe sets were obtained from the UCSC genome browser<sup>20</sup>.

## a. Recovery of RefSeq Transcription Start Sites in CD4, CD36, CD133

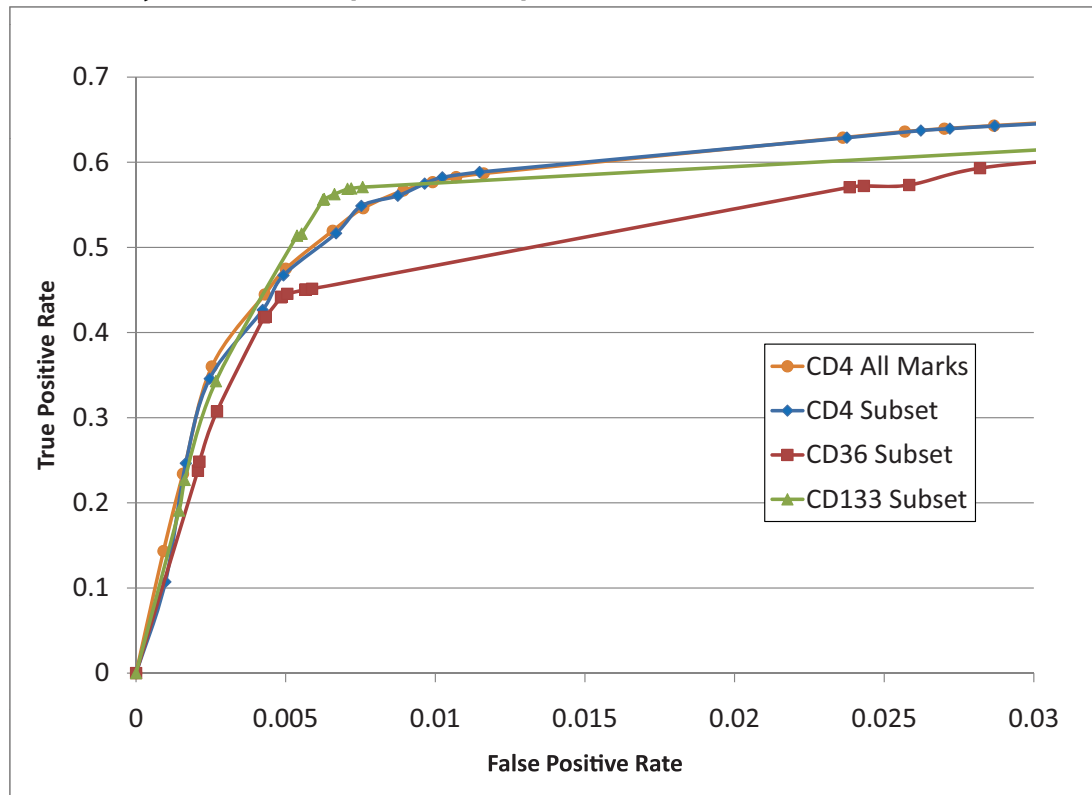

## b. Recovery of RefSeq Transcripts in CD4, CD36, CD133

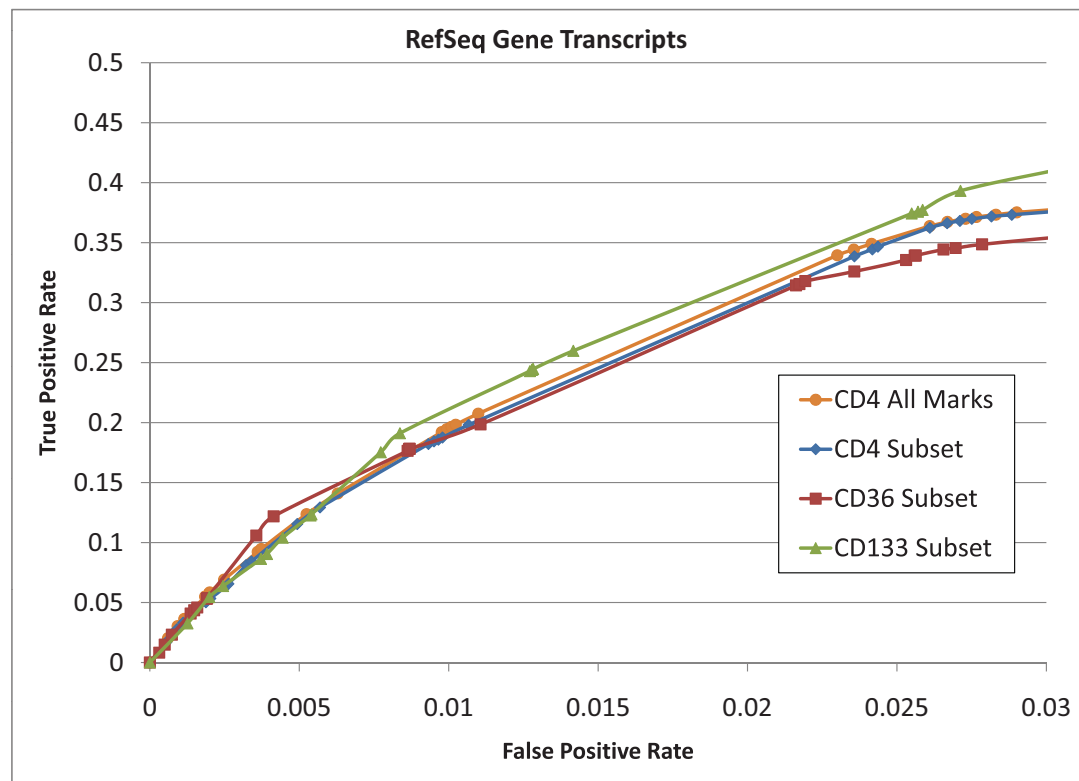

**Supplementary Figure 36. Transcription Start Site (TSS) and Transcribed Region recovery in additional cell types.** This figure shows the recovery of RefSeq TSS and genes when applying the CD4 model learned on 41 marks to the subset of 10 marks inferred from the CD36 and CD133 data<sup>25</sup>. The states are ordered in the same way as used in the analysis based on the CD4 model with all the marks as shown in **Figure 5**. The figure indicates the functional enrichment of these states are relatively robust across these cell types. The recovery of TSS in CD36 compared to CD133 was somewhat lower, consistent with the previous observation<sup>25</sup> that in the more differentiated CD36 cells fewer repressed gene promoters are marked with H3K4me3.

a. % State overlap at varying distances within TSS

| state | TSS +/-2kb | TSS +/-5kb | TSS +/-10kb | TSS +/-20kb | TSS +/-50kb | TSS +/-100kb |
|-------|------------|------------|-------------|-------------|-------------|--------------|
| 1     | 50.7       | 54.4       | 59.5        | 67.3        | 81.3        | 90.6         |
| 2     | 41.0       | 45.8       | 51.1        | 60.0        | 76.0        | 87.1         |
| 3     | 51.6       | 57.1       | 62.7        | 70.3        | 82.8        | 91.0         |
| 4     | 56.7       | 65.0       | 70.8        | 77.0        | 85.7        | 92.1         |
| 5     | 74.3       | 79.1       | 82.7        | 86.8        | 92.7        | 96.6         |
| 6     | 77.8       | 81.0       | 84.0        | 88.1        | 93.7        | 97.2         |
| 7     | 88.7       | 90.6       | 92.2        | 94.3        | 97.4        | 99.0         |
| 8     | 71.5       | 80.1       | 83.9        | 88.7        | 94.8        | 98.3         |
| 9     | 40.9       | 69.0       | 79.0        | 85.3        | 92.9        | 96.9         |
| 10    | 48.4       | 56.2       | 65.0        | 75.2        | 89.6        | 96.6         |
| 11    | 54.0       | 72.6       | 80.7        | 87.6        | 94.8        | 98.4         |
| 12    | 8.3        | 18.7       | 32.4        | 51.8        | 79.4        | 94.6         |
| 13    | 6.3        | 21.6       | 39.6        | 60.3        | 84.7        | 95.7         |
| 14    | 9.2        | 20.2       | 32.6        | 49.1        | 75.1        | 91.3         |
| 15    | 3.4        | 17.8       | 37.2        | 59.8        | 85.1        | 95.6         |
| 16    | 3.7        | 17.0       | 35.1        | 56.4        | 82.7        | 94.9         |
| 17    | 6.6        | 16.8       | 27.5        | 42.2        | 68.3        | 86.4         |
| 18    | 2.7        | 11.3       | 23.1        | 39.6        | 67.1        | 86.0         |
| 19    | 2.1        | 10.4       | 23.1        | 40.8        | 68.9        | 87.5         |
| 20    | 21.1       | 30.0       | 39.8        | 53.8        | 76.2        | 89.5         |
| 21    | 27.8       | 45.4       | 58.5        | 71.9        | 88.4        | 95.4         |
| 22    | 4.4        | 19.3       | 38.6        | 60.5        | 84.0        | 94.1         |
| 23    | 10.2       | 25.7       | 43.3        | 63.4        | 84.7        | 94.2         |
| 24    | 1.3        | 5.9        | 15.6        | 32.9        | 65.3        | 85.9         |
| 25    | 0.6        | 2.8        | 9.6         | 26.0        | 60.3        | 83.7         |
| 26    | 1.0        | 4.0        | 10.8        | 25.9        | 57.5        | 80.9         |
| 27    | 3.2        | 12.2       | 27.8        | 51.6        | 82.7        | 96.3         |
| 28    | 4.2        | 12.5       | 30.6        | 61.0        | 85.7        | 92.7         |
| 29    | 11.0       | 16.3       | 24.4        | 38.2        | 64.7        | 81.1         |
| 30    | 15.0       | 21.4       | 29.1        | 42.0        | 65.9        | 82.3         |
| 31    | 14.7       | 20.2       | 26.9        | 37.9        | 59.4        | 77.0         |
| 32    | 8.5        | 15.4       | 23.8        | 36.6        | 61.2        | 79.2         |
| 33    | 14.4       | 22.8       | 32.1        | 45.2        | 67.1        | 82.9         |
| 34    | 13.3       | 24.0       | 33.4        | 46.7        | 69.9        | 85.3         |
| 35    | 5.3        | 13.3       | 21.9        | 34.3        | 56.3        | 74.9         |
| 36    | 4.4        | 13.1       | 23.4        | 36.6        | 58.8        | 76.1         |
| 37    | 2.6        | 8.7        | 18.3        | 33.2        | 58.8        | 77.0         |
| 38    | 8.4        | 14.3       | 21.2        | 32.3        | 54.8        | 73.0         |
| 39    | 4.1        | 10.5       | 20.2        | 35.1        | 61.8        | 79.8         |
| 40    | 0.9        | 2.2        | 4.3         | 8.1         | 16.8        | 25.6         |
| 41    | 0.3        | 0.9        | 1.8         | 3.7         | 9.2         | 18.0         |
| 42    | 0.5        | 1.0        | 1.9         | 3.8         | 9.2         | 18.1         |
| 43    | 1.3        | 3.8        | 8.5         | 17.5        | 38.0        | 58.3         |
| 44    | 1.5        | 3.9        | 8.5         | 17.3        | 37.3        | 57.7         |
| 45    | 11.0       | 22.4       | 31.9        | 43.0        | 61.1        | 76.7         |
| 46    | 4.2        | 9.4        | 17.8        | 30.1        | 53.6        | 71.3         |
| 47    | 1.6        | 5.1        | 10.8        | 21.6        | 43.9        | 63.4         |
| 48    | 2.7        | 6.0        | 11.0        | 20.2        | 35.8        | 46.9         |
| 49    | 1.9        | 3.1        | 4.9         | 8.4         | 17.1        | 24.7         |
| 50    | 0.9        | 2.0        | 3.7         | 6.8         | 14.1        | 21.8         |
| 51    | 1.1        | 2.1        | 2.6         | 5.7         | 9.9         | 18.6         |

|           |     |     |      |      |      |      |
|-----------|-----|-----|------|------|------|------|
| % Overall | 2.7 | 6.3 | 11.6 | 20.4 | 37.4 | 52.3 |
|-----------|-----|-----|------|------|------|------|

b. State overlap at varying distances from any gene

| state | intergenic | intergenic >2kb away | intergenic >5kb away | intergenic >10kb away | intergenic >20kb away | intergenic >50kb away | intergenic >100kb away |
|-------|------------|----------------------|----------------------|-----------------------|-----------------------|-----------------------|------------------------|
| 1     | 55.2       | 27.9                 | 24.6                 | 20.9                  | 15.6                  | 9.0                   | 4.6                    |
| 2     | 56.2       | 35.2                 | 30.9                 | 26.4                  | 20.2                  | 11.7                  | 6.3                    |
| 3     | 51.2       | 30.3                 | 26.2                 | 21.4                  | 15.9                  | 8.5                   | 4.5                    |
| 4     | 47.9       | 28.7                 | 23.9                 | 20.3                  | 15.4                  | 8.5                   | 4.6                    |
| 5     | 37.4       | 14.5                 | 12.0                 | 9.7                   | 7.2                   | 3.6                   | 1.8                    |
| 6     | 39.1       | 13.3                 | 10.8                 | 8.8                   | 6.0                   | 2.9                   | 1.3                    |
| 7     | 30.4       | 7.2                  | 5.9                  | 4.8                   | 3.3                   | 1.3                   | 0.4                    |
| 8     | 12.5       | 6.8                  | 5.5                  | 4.9                   | 3.7                   | 1.2                   | 0.3                    |
| 9     | 10.7       | 7.7                  | 6.3                  | 5.6                   | 4.3                   | 2.0                   | 0.6                    |
| 10    | 12.7       | 7.1                  | 5.6                  | 4.5                   | 3.0                   | 1.1                   | 0.4                    |
| 11    | 7.9        | 4.4                  | 3.5                  | 2.9                   | 1.8                   | 0.6                   | 0.2                    |
| 12    | 7.2        | 5.9                  | 5.0                  | 4.2                   | 3.1                   | 1.1                   | 0.2                    |
| 13    | 5.3        | 4.8                  | 4.2                  | 3.5                   | 2.6                   | 0.9                   | 0.3                    |
| 14    | 17.7       | 14.0                 | 10.7                 | 8.2                   | 5.8                   | 2.6                   | 1.0                    |
| 15    | 5.1        | 4.7                  | 3.9                  | 3.2                   | 2.3                   | 0.8                   | 0.1                    |
| 16    | 7.8        | 7.0                  | 5.6                  | 4.4                   | 3.0                   | 1.2                   | 0.3                    |
| 17    | 6.0        | 4.8                  | 3.6                  | 2.5                   | 1.8                   | 0.6                   | 0.2                    |
| 18    | 6.7        | 5.7                  | 4.4                  | 3.2                   | 2.3                   | 0.9                   | 0.3                    |
| 19    | 11.0       | 9.7                  | 7.6                  | 5.6                   | 3.9                   | 1.9                   | 0.8                    |
| 20    | 29.6       | 20.7                 | 16.0                 | 12.4                  | 8.6                   | 4.4                   | 2.2                    |
| 21    | 16.8       | 8.7                  | 5.1                  | 3.3                   | 2.1                   | 1.0                   | 0.4                    |
| 22    | 7.6        | 5.0                  | 3.6                  | 2.9                   | 2.2                   | 1.2                   | 0.6                    |
| 23    | 18.6       | 11.4                 | 7.2                  | 4.9                   | 3.1                   | 1.4                   | 0.6                    |
| 24    | 9.9        | 6.6                  | 4.1                  | 2.4                   | 1.3                   | 0.6                   | 0.2                    |
| 25    | 9.0        | 5.8                  | 4.1                  | 3.0                   | 2.0                   | 1.0                   | 0.5                    |
| 26    | 14.4       | 11.0                 | 7.4                  | 4.7                   | 3.0                   | 1.5                   | 0.6                    |
| 27    | 12.3       | 4.7                  | 1.7                  | 0.6                   | 0.4                   | 0.2                   | 0.0                    |
| 28    | 23.3       | 17.6                 | 14.1                 | 10.8                  | 7.0                   | 3.9                   | 2.5                    |
| 29    | 55.6       | 46.6                 | 41.9                 | 36.2                  | 27.9                  | 16.7                  | 9.0                    |
| 30    | 54.2       | 42.2                 | 36.9                 | 31.7                  | 25.2                  | 15.7                  | 9.1                    |
| 31    | 68.1       | 56.2                 | 51.0                 | 45.0                  | 36.8                  | 22.9                  | 13.3                   |
| 32    | 57.7       | 51.2                 | 45.3                 | 39.3                  | 31.1                  | 18.7                  | 9.9                    |
| 33    | 48.6       | 39.4                 | 33.1                 | 26.9                  | 20.1                  | 11.5                  | 6.4                    |
| 34    | 48.4       | 38.1                 | 30.4                 | 24.5                  | 18.4                  | 10.4                  | 5.6                    |
| 35    | 65.5       | 61.0                 | 54.6                 | 47.9                  | 38.9                  | 24.4                  | 14.2                   |
| 36    | 67.2       | 63.1                 | 56.0                 | 48.0                  | 38.1                  | 23.5                  | 13.8                   |
| 37    | 61.8       | 58.9                 | 53.1                 | 44.5                  | 33.4                  | 19.2                  | 11.1                   |
| 38    | 68.4       | 61.9                 | 56.5                 | 50.4                  | 41.6                  | 26.7                  | 16.0                   |
| 39    | 63.5       | 58.6                 | 51.7                 | 43.0                  | 32.0                  | 17.7                  | 9.8                    |
| 40    | 90.3       | 89.5                 | 88.4                 | 86.6                  | 83.5                  | 76.7                  | 69.6                   |
| 41    | 78.4       | 78.1                 | 77.6                 | 76.7                  | 75.1                  | 70.4                  | 63.4                   |
| 42    | 77.3       | 76.9                 | 76.4                 | 75.5                  | 73.8                  | 69.1                  | 62.0                   |
| 43    | 67.1       | 65.8                 | 63.5                 | 59.6                  | 52.3                  | 37.6                  | 24.7                   |
| 44    | 65.5       | 64.2                 | 62.0                 | 58.1                  | 51.2                  | 37.4                  | 24.6                   |
| 45    | 65.9       | 59.5                 | 53.1                 | 46.6                  | 38.0                  | 24.6                  | 14.0                   |
| 46    | 57.8       | 54.4                 | 50.6                 | 44.3                  | 37.1                  | 24.6                  | 15.2                   |
| 47    | 71.2       | 69.5                 | 66.2                 | 60.4                  | 50.8                  | 34.3                  | 21.9                   |
| 48    | 83.4       | 79.9                 | 75.0                 | 69.2                  | 62.5                  | 53.4                  | 46.4                   |
| 49    | 91.3       | 89.7                 | 88.4                 | 86.7                  | 83.4                  | 76.3                  | 68.1                   |
| 50    | 94.2       | 93.3                 | 92.4                 | 90.6                  | 86.9                  | 79.4                  | 69.7                   |
| 51    | 93.9       | 93.2                 | 93.1                 | 92.0                  | 87.5                  | 81.1                  | 74.4                   |

|           |      |      |      |      |      |      |      |
|-----------|------|------|------|------|------|------|------|
| % Overall | 63.7 | 61.6 | 59.1 | 55.7 | 50.7 | 41.8 | 34.0 |
| % of Pol2 | 28.5 | 14.9 | 11.4 | 9.1  | 6.9  | 4.1  | 2.5  |

c. Pol2 detection away from genes

| all  | intergenic | intergenic >2kb away | intergenic >5kb away | intergenic >10kb away | intergenic >20kb away | intergenic >50kb away | intergenic >100kb away |
|------|------------|----------------------|----------------------|-----------------------|-----------------------|-----------------------|------------------------|
| 51.6 | 51.9       | 47.6                 | 46.1                 | 44.5                  | 41.3                  | 36.6                  | 32.9                   |
| 18.1 | 17.6       | 15.2                 | 14.1                 | 13.4                  | 12.2                  | 10.7                  | 9.2                    |
| 11.2 | 11.0       | 8.9                  | 8.2                  | 7.8                   | 7.2                   | 6.4                   | 6.0                    |
| 1.9  | 1.6        | 1.3                  | 1.2                  | 1.2                   | 1.1                   | 1.0                   | 0.7                    |
| 53.5 | 52.9       | 42.1                 | 40.9                 | 38.9                  | 36.3                  | 33.3                  | 26.8                   |
| 69.2 | 67.6       | 63.8                 | 62.5                 | 60.8                  | 57.3                  | 52.2                  | 44.3                   |
| 88.0 | 89.4       | 86.9                 | 86.7                 | 85.8                  | 85.1                  | 80.7                  | 80.9                   |
| 62.1 | 63.7       | 62.3                 | 61.5                 | 60.6                  | 60.5                  | 50.5                  | 60.4                   |
| 34.7 | 39.1       | 33.5                 | 32.4                 | 33.0                  | 30.8                  | 32.1                  | 19.3                   |
| 46.6 | 47.8       | 49.4                 | 48.1                 | 45.0                  | 41.6                  | 35.0                  | 36.7                   |
| 30.9 | 34.0       | 27.2                 | 27.6                 | 27.3                  | 27.5                  | 21.1                  | 15.9                   |
| 18.0 | 13.9       | 11.8                 | 11.4                 | 10.3                  | 9.7                   | 7.0                   | 3.6                    |
| 10.2 | 10.1       | 8.5                  | 8.0                  | 7.7                   | 6.8                   | 4.8                   | 4.9                    |
| 6.9  | 4.7        | 4.2                  | 3.4                  | 3.3                   | 3.6                   | 2.6                   | 2.0                    |
| 5.0  | 5.1        | 4.2                  | 3.4                  | 3.1                   | 2.9                   | 2.0                   | 2.0                    |
| 0.6  | 0.6        | 0.5                  | 0.4                  | 0.4                   | 0.4                   | 0.4                   | 0.7                    |
| 3.5  | 5.7        | 5.0                  | 4.2                  | 3.3                   | 3.3                   | 3.8                   | 0.1                    |
| 1.6  | 1.8        | 1.7                  | 1.3                  | 1.3                   | 1.3                   | 0.9                   | 1.0                    |
| 0.4  | 0.5        | 0.4                  | 0.3                  | 0.4                   | 0.4                   | 0.3                   | 0.4                    |
| 14.5 | 15.8       | 12.8                 | 10.2                 | 9.6                   | 9.1                   | 8.6                   | 8.7                    |
| 15.1 | 20.0       | 13.4                 | 8.7                  | 9.3                   | 10.9                  | 11.1                  | 3.3                    |
| 8.5  | 11.8       | 8.3                  | 5.4                  | 4.9                   | 5.5                   | 7.4                   | 0.8                    |
| 1.4  | 1.9        | 1.3                  | 0.8                  | 0.6                   | 0.7                   | 0.7                   | 0.6                    |
| 2.2  | 4.3        | 3.3                  | 1.9                  | 1.3                   | 0.9                   | 1.0                   | 0.6                    |
| 0.8  | 1.3        | 0.8                  | 0.4                  | 0.3                   | 0.2                   | 0.2                   | 0.2                    |
| 0.6  | 1.1        | 0.8                  | 0.5                  | 0.3                   | 0.2                   | 0.2                   | 0.1                    |
| 21.7 | 40.5       | 38.9                 | 33.5                 | 26.6                  | 27.7                  | 35.6                  | 5.2                    |
| 1.3  | 1.4        | 1.2                  | 0.7                  | 0.7                   | 0.6                   | 0.7                   | 1.0                    |
| 13.6 | 12.6       | 12.2                 | 11.6                 | 11.4                  | 10.1                  | 9.6                   | 9.1                    |
| 9.1  | 8.4        | 7.7                  | 7.2                  | 7.0                   | 6.6                   | 6.2                   | 5.5                    |
| 1.2  | 1.2        | 1.1                  | 1.0                  | 0.9                   | 0.8                   | 0.6                   | 0.5                    |
| 1.6  | 1.5        | 1.2                  | 1.0                  | 0.9                   | 0.8                   | 0.8                   | 0.9                    |
| 2.6  | 2.6        | 2.2                  | 1.8                  | 1.6                   | 1.5                   | 1.3                   | 1.3                    |
| 1.5  | 1.5        | 1.2                  | 1.0                  | 0.9                   | 0.9                   | 0.8                   | 0.9                    |
| 0.3  | 0.3        | 0.2                  | 0.2                  | 0.2                   | 0.2                   | 0.2                   | 0.1                    |
| 0.1  | 0.1        | 0.1                  | 0.1                  | 0.1                   | 0.1                   | 0.1                   | 0.1                    |
| 0.1  | 0.1        | 0.1                  | 0.1                  | 0.0                   | 0.0                   | 0.0                   | 0.1                    |
| 0.1  | 0.2        | 0.1                  | 0.1                  | 0.1                   | 0.1                   | 0.1                   | 0.1                    |
| 4.1  | 4.2        | 3.7                  | 3.3                  | 3.0                   | 2.6                   | 2.1                   | 2.1                    |
| 0.0  | 0.0        | 0.0                  | 0.0                  | 0.0                   | 0.0                   | 0.0                   | 0.0                    |
| 0.0  | 0.0        | 0.0                  | 0.0                  | 0.0                   | 0.0                   | 0.0                   | 0.0                    |
| 0.1  | 0.1        | 0.1                  | 0.1                  | 0.1                   | 0.1                   | 0.1                   | 0.1                    |
| 0.0  | 0.0        | 0.0                  | 0.0                  | 0.0                   | 0.0                   | 0.0                   | 0.0                    |
| 0.1  | 0.1        | 0.1                  | 0.1                  | 0.1                   | 0.1                   | 0.1                   | 0.1                    |
| 0.1  | 0.1        | 0.1                  | 0.1                  | 0.1                   | 0.1                   | 0.1                   | 0.1                    |
| 0.6  | 0.6        | 0.5                  | 0.5                  | 0.5                   | 0.5                   | 0.5                   | 0.6                    |
| 0.1  | 0.1        | 0.1                  | 0.1                  | 0.1                   | 0.1                   | 0.1                   | 0.1                    |
| 0.1  | 0.1        | 0.1                  | 0.1                  | 0.1                   | 0.1                   | 0.0                   | 0.0                    |
| 0.9  | 0.9        | 0.9                  | 0.9                  | 0.9                   | 0.9                   | 0.9                   | 0.9                    |
| 14.1 | 13.6       | 13.3                 | 13.4                 | 13.2                  | 13.4                  | 13.8                  | 14.6                   |
| 69.6 | 69.1       | 68.9                 | 68.9                 | 69.1                  | 69.3                  | 68.8                  | 67.8                   |

### Supplementary Figure 37: State overlap of varying distances from TSS and genes, and detection of PolII away from genes a.

The table shows the percentage of each state which is within fixed distances of 2kb, 5kb, 10kb, 20kb, 50kb, and 100kb from a RefSeq transcription start site. The bottom row are the genome-wide percentages. One can see in this table the majority of States 29-33 are more than 20kb from an annotated RefSeq TSS, despite enriching for open chromatin and transcription factor binding making many locations within these states candidates for distal enhancers. While a majority of States 1-3 fall within 20kb of an annotated TSS between 30-40% does not, and are possible candidate distal enhancers. **b.** The table on the left shows the percentage of each state that is outside a RefSeq transcribed region, and at least 2kb, 5kb, 10kb, 20kb, 50kb, and 100kb from a RefSeq transcribed region. **c.** The percentage of PolII '1' calls for the state outside of the same regions shown on the table at left. This table indicates there is Pol2 present in location away from known genes. Some of this may correspond to unannotated genes, while in other cases it could be for other reasons such as enhancer looping.

| state | H3K9me3 | H4K20me3 | H3K36me3 |  | Satellite repeats | ZNF Gene Fold | Combination    |
|-------|---------|----------|----------|--|-------------------|---------------|----------------|
| 47    | 32      | 2        | 2        |  | 0.5               | 0.8           | H3K9me3        |
| 48    | 12      | 38       | 1        |  | 63.4              | 10.8          | +H4K20me3      |
| 28    | 43      | 75       | 69       |  | 0.7               | 111.8         | +H3K36me3      |
| 25    | 2       | 0        | 60       |  | 0.1               | 3.6           | H3K36me3 alone |

**Supplementary Figure 38: Example of combinatorial mark relationships.** In this example the enrichment for Satellite repeats occurs when H3K9me3 and H4K20me3 co-occur in a State 48 without H3K36me3, but not necessarily with H3K36me3 (State 28), for H3K9me3 alone (State 47), or for H3K36me3 alone (State 25). The enrichment for ZNF genes is an order of magnitude greater in State 28 which is also associated with H3K36me3 as compared to State 48 which is not.



[illegible]

**Supplementary Figure 40: Chromatin State Recovery with all marks except CTCF and Pol2.** The figure shows the percentage of each state that would be recovered when excluding CTCF and Pol2, but using the 38-histone modifications and H2A.Z to determine the posterior state assignments. We find that nearly all individual states are recovered at rates greater than 90%. The only three exceptions are insulator state 39 that heavily relies on CTCF (10% recovery), transcription end state 27 that relies on Pol2 (69% recovery), and promoter state 5 (88% recovery).

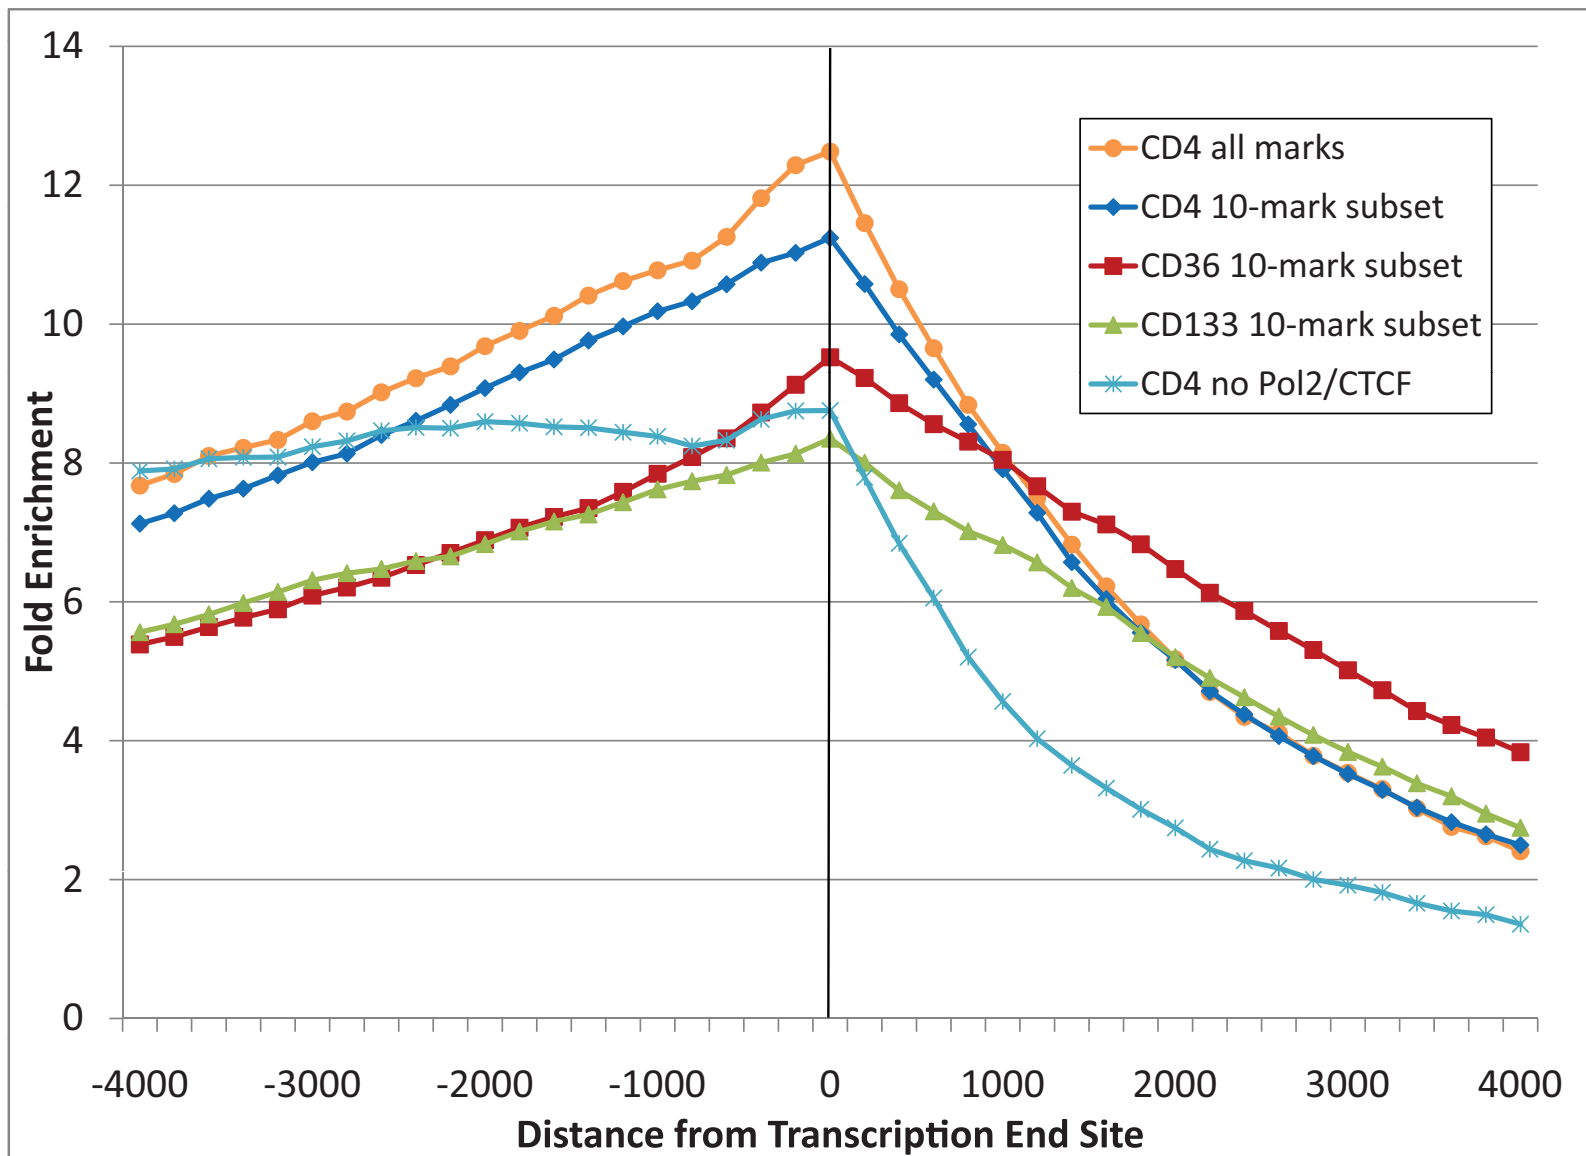

**Supplementary Figure 41: Enrichment of State 27 Relative to the Transcription End Sites across Cell Types.** The figure shows that state 27 learned based on 41 marks in CD4 T cells still shows enrichment relative to the transcription end site in two additional cell types, CD36 and CD133, based on a subset of 10 marks<sup>25</sup>. Even though the model was not learned with CD36 and CD133 the state still show an enrichment profiling peaking over the transcription end site. Also shown is the enrichment of the state based on the same subset of 10 marks in CD4 T as well as all marks in CD4 T cells except CTCF and PolII.

## Supplementary References

1. Schones, D. E. *et al.* Dynamic regulation of nucleosome positioning in the human genome. *Cell* **132**, 887-898 (2008).
2. Elkan, C. *Using the triangle inequality to accelerate k-means* (Twentieth International Conference on Machine Learning (ICML'03) Ser. 20, 2003).
3. Komarek, P. & Moore, A. W. *Making logistic regression a core data mining tool with tr-irls* (Proceedings of the 5th International Conference on Data Mining, 2005).
4. Hon, G., Ren, B. & Wang, W. ChromaSig: a probabilistic approach to finding common chromatin signatures in the human genome. *PLoS Comput. Biol.* **4**, e1000201 (2008).
5. Bar-Joseph, Z., Gifford, D. K. & Jaakkola, T. S. Fast optimal leaf ordering for hierarchical clustering. *Bioinformatics* **17**, S22 (2001).
6. Zang, C. *et al.* A clustering approach for identification of enriched domains from histone modification ChIP-Seq data. *Bioinformatics* **25**, 1952-1958 (2009).
7. Su, A. I. *et al.* A gene atlas of the mouse and human protein-encoding transcriptomes. *Proc. Natl. Acad. Sci. U. S. A.* **101**, 6062-6067 (2004).
8. Zeller, K. I. *et al.* Global mapping of c-Myc binding sites and target gene networks in human B cells. *Proceedings of the National Academy of Sciences* **103**, 17834 (2006).
9. Lupien, M. *et al.* FoxA1 translates epigenetic signatures into enhancer-driven lineage-specific transcription. *Cell* **132**, 958-970 (2008).
10. Lin, C. Y. *et al.* Whole-genome cartography of estrogen receptor alpha binding sites. *PLoS Genet* **3**, e87 (2007).
11. Valouev, A. *et al.* Genome-wide analysis of transcription factor binding sites based on ChIP-Seq data. *Nature methods* **5**, 829-834 (2008).
12. O'Geen, H. *et al.* Genome-wide analysis of KAP1 binding suggests autoregulation of KRAB-ZNFs. *PLoS Genet.* **3**, e89 (2007).
13. Lim, C. A. *et al.* Genome-wide mapping of RELA (p65) binding identifies E2F1 as a transcriptional activator recruited by NF- $\kappa$ B upon TLR4 activation. *Mol. Cell* **27**, 622-635 (2007).
14. Johnson, D. S., Mortazavi, A., Myers, R. M. & Wold, B. Genome-wide mapping of in vivo protein-DNA interactions. *Science* **316**, 1497 (2007).
15. Wei, C. L. *et al.* A global map of p53 transcription-factor binding sites in the human genome. *Cell* **124**, 207-219 (2006).
16. Yang, A. *et al.* Relationships between p63 binding, DNA sequence, transcription activity, and biological function in human cells. *Mol. Cell* **24**, 593-602 (2006).
17. Robertson, G. *et al.* Genome-wide profiles of STAT1 DNA association using chromatin immunoprecipitation and massively parallel sequencing. *Nature methods* **4**, 651-657 (2007).
18. Rada-Iglesias, A. *et al.* Whole-genome maps of USF1 and USF2 binding and histone H3 acetylation reveal new aspects of promoter structure and candidate genes for common human disorders. *Genome Res.* **18**, 380 (2008).
19. Andersson, R., Enroth, S., Rada-Iglesias, A., Wadelius, C. & Komorowski, J. Nucleosomes are well positioned in exons and carry characteristic histone modifications. *Genome Res.* **19**, 1732-1741 (2009).
20. Karolchik, D. *et al.* The UCSC Genome Browser Database: 2008 update. *Nucleic Acids Res.* **36**, D773-9 (2008).
21. Furey, T. S. & Haussler, D. Integration of the cytogenetic map with the draft human genome sequence. *Hum. Mol. Genet.* **12**, 1037-1044 (2003).
22. Ernst, J. & Bar-Joseph, Z. STEM: a tool for the analysis of short time series gene expression data. *BMC Bioinformatics* **7**, 191 (2006).
23. Wang, Z. *et al.* Genome-wide mapping of HATs and HDACs reveals distinct functions in active and inactive genes. *Cell* **138**, 1019-1031 (2009).
24. Smit, A., Hubley, R. & Green, P. *RepeatMasker Open-3.0* (1996).
25. Cui, K. *et al.* Chromatin signatures in multipotent human hematopoietic stem cells indicate the fate of bivalent genes during differentiation. *Cell. Stem Cell.* **4**, 80-93 (2009).
